# Supplementary material for: Ligand-controlled regiodivergent π-allyl palladium catalysis enables a switch between [3+2] and [3+3] cycloadditions
Source: Royal Society of Chemistry journal article supplement (doi:10.1039/c9cc00611g), 2019-01-01

## Supporting Information

### Ligand-Controlled Regiodivergent $\pi$ -Allyl Palladium Catalysis

#### Enables Switch between [3+2] and [3+3] Cycloadditions

Yu Xia,<sup>a</sup> Qiao-Fei Bao,<sup>a</sup> Yuke Li,<sup>b</sup> Li-Jing Wang,<sup>c</sup> Bo-Sheng Zhang,<sup>a</sup> Hong-Chao Liu,<sup>a</sup> and Yong-Min Liang<sup>\*a</sup>

<sup>a</sup>State Key Laboratory of Applied Organic Chemistry, School of Chemistry and Chemical Engineering, Lanzhou University, Lanzhou 730000 (P. R. China)

<sup>b</sup>Department of Chemistry and Centre for Scientific Modeling and Computation, Chinese University of Hong Kong, Shatin, Hong Kong, China

<sup>c</sup>Key Laboratory of Medicinal Chemistry, and Molecular Diagnosis of the Ministry of Education, College of Chemistry & Environmental Science, HeBei University, 180 Wusi Donglu, Baoding 071002, P. R. China

[liangym@lzu.edu.cn](mailto:liangym@lzu.edu.cn)

## Table of Contents

|                                                                      |    |
|----------------------------------------------------------------------|----|
| 1. General Information .....                                         | 3  |
| 2. X-ray Single Crystal Diffraction Data .....                       | 4  |
| 3. Table S1 Optimization of the [3+3] Cycloaddition Conditions ..... | 7  |
| 4. Table S2 Control Reactions.....                                   | 8  |
| 5. Diversification of This Protocol.....                             | 8  |
| 6. General Procedure .....                                           | 8  |
| 1) Synthesis of <b>4, 5, 6</b> .....                                 | 8  |
| 2) Synthesis of substrates <b>1b, 1c-1e, 2b, 3, 8</b> .....          | 9  |
| 3) References for substrates synthesis.....                          | 9  |
| 7. Spectral Data of Products.....                                    | 10 |
| 8. Spetra of Products.....                                           | 23 |

## 1. General Information

Column chromatography was carried out on silica gel.  $^1\text{H}$  NMR spectra were recorded on 400 MHz in  $\text{CDCl}_3$ ,  $^{13}\text{C}$  NMR spectra were recorded on 100 MHz in  $\text{CDCl}_3$ , and product **5g**  $^{13}\text{C}$  NMR spectra used  $\text{C}_3\text{D}_6\text{O}$  as solvent. Notably, some spectra worked with different nuclear magnetic resonance spectrometer. IR spectra were recorded on a FT-IR spectrometer and only major peaks are reported in  $\text{cm}^{-1}$ . All products were further characterized by high resolution mass spectra (HRMS), the HRMS was obtained on a Q-Exactive Hybrid Quadrupole-Orbitrap Mass Spectrometer. Copies of their  $^1\text{H}$  NMR,  $^{13}\text{C}$  NMR spectra are provided in the ESI. Unless otherwise noted, materials obtained from commercial suppliers were used without further purification.

## 2. X-ray Single Crystal Diffraction Data

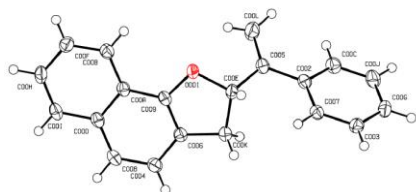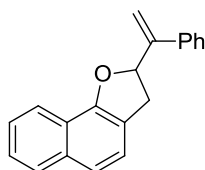

**4a**

Bond precision: C-C = 0.0020 Å  
 Cell: a=8.7455(6) b=9.5862(9) c=9.8123(10)  
 alpha=63.15(1) beta=73.885(7) gamma=82.681(7)  
 Temperature: 120 K

|                        | Calculated                        | Reported                          |
|------------------------|-----------------------------------|-----------------------------------|
| Volume                 | 705.10(13)                        | 705.10(12)                        |
| Space group            | P -1                              | P -1                              |
| Hall group             | -P 1                              | -P 1                              |
| Moiety formula         | C <sub>20</sub> H <sub>16</sub> O | C <sub>20</sub> H <sub>16</sub> O |
| Sum formula            | C <sub>20</sub> H <sub>16</sub> O | C <sub>20</sub> H <sub>16</sub> O |
| Mr                     | 272.33                            | 271.32                            |
| Dx, g cm <sup>-3</sup> | 1.283                             | 1.278                             |
| Z                      | 2                                 | 2                                 |
| Mu (mm <sup>-1</sup> ) | 0.599                             | 0.599                             |
| F <sub>000</sub>       | 288.0                             | 286.0                             |
| F <sub>000</sub> '     | 288.79                            |                                   |
| h,k,lmax               | 10,11,12                          | 10,11,12                          |
| Nref                   | 2851                              | 2743                              |
| Tmin,Tmax              | 0.750, 0.942                      | 0.785, 1.000                      |
| Tmin'                  | 0.658                             |                                   |

Correction method= # Reported T Limits: Tmin=0.785 Tmax=1.000

AbsCorr = MULTI-SCAN

Data completeness= 0.962 Theta(max)= 74.008

R(reflections)= 0.0515( 2456) wR2(reflections)= 0.1495( 2743)

S = 1.048 Npar= 195

The thermal ellipsoids are shown at 30% probability.

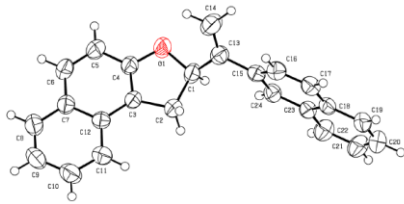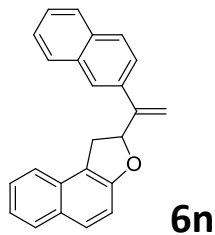

Bond precision: C-C = 0.0032 Å  
 Cell: a=20.5655(10) b=6.0870(3) Wavelength=0.71073  
 alpha=90 beta=98.487(5) c=27.2088(14)  
 gamma=90

Temperature: 293 K

|                        | Calculated                        | Reported                          |
|------------------------|-----------------------------------|-----------------------------------|
| Volume                 | 3368.8(3)                         | 3368.7(3)                         |
| Space group            | C 2/c                             | C 1 2/c 1                         |
| Hall group             | -C 2yc                            | -C 2yc                            |
| Moiety formula         | C <sub>24</sub> H <sub>18</sub> O | C <sub>24</sub> H <sub>18</sub> O |
| Sum formula            | C <sub>24</sub> H <sub>18</sub> O | C <sub>24</sub> H <sub>18</sub> O |
| Mr                     | 322.38                            | 322.38                            |
| Dx, g cm <sup>-3</sup> | 1.271                             | 1.271                             |
| Z                      | 8                                 | 8                                 |
| Mu (mm <sup>-1</sup> ) | 0.076                             | 0.076                             |
| F <sub>000</sub>       | 1360.0                            | 1360.0                            |
| F <sub>000</sub> '     | 1360.55                           |                                   |
| h,k,lmax               | 25,7,33                           | 25,7,33                           |
| Nref                   | 3326                              | 3323                              |
| Tmin,Tmax              | 0.985, 0.989                      | 0.981, 1.000                      |
| Tmin'                  | 0.984                             |                                   |

Correction method= # Reported T Limits: Tmin=0.981 Tmax=1.000

AbsCorr = MULTI-SCAN

Data completeness= 0.999

Theta(max)= 26.020

R(reflections)= 0.0549( 2083)

wR2(reflections)= 0.1401( 3323)

S = 1.075

Npar= 234

The thermal ellipsoids are shown at 30% probability.

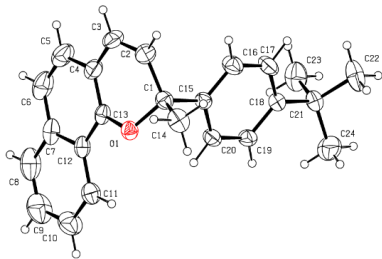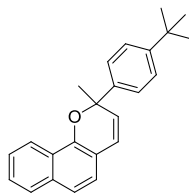

**5j**

Bond precision: C-C = 0.0054 Å  
 Cell: a=7.4217(15) b=11.0439(17) c=12.509(2)  
 alpha=102.076(15) beta=98.045(16) gamma=106.355(16)

Temperature: 295 K

|                        | Calculated                        | Reported                          |
|------------------------|-----------------------------------|-----------------------------------|
| Volume                 | 940.2(3)                          | 940.2(3)                          |
| Space group            | P -1                              | P -1                              |
| Hall group             | :-P 1                             | -P 1                              |
| Moiety formula         | C <sub>24</sub> H <sub>24</sub> O | C <sub>24</sub> H <sub>24</sub> O |
| Sum formula            | C <sub>24</sub> H <sub>24</sub> O | C <sub>24</sub> H <sub>24</sub> O |
| Mr                     | 328.43                            | 328.43                            |
| Dx, g cm <sup>-3</sup> | 1.160                             | 1.160                             |
| Z                      | 2                                 | 2                                 |
| Mu (mm <sup>-1</sup> ) | 0.069                             | 0.069                             |
| F <sub>000</sub>       | 352.0                             | 352.0                             |
| F <sub>000</sub> '     | 352.14                            |                                   |
| h,k,lmax               | 9,13,15                           | 9,13,15                           |
| Nref                   | 3706                              | 3699                              |
| Tmin,Tmax              | 0.988, 0.992                      | 0.893, 1.000                      |
| Tmin'                  | 0.986                             |                                   |

Correction method= # Reported T Limits: Tmin=0.893 Tmax=1.000

AbsCorr = MULTI-SCAN

Data completeness= 0.998

Theta(max)= 26.020

R(reflections)= 0.0736( 1577)

wR2(reflections)= 0.1909( 3699)

S = 1.029

Npar= 230

The thermal ellipsoids are shown at 30% probability.

### 3. Table S1 Optimization of the [3+3] Cycloaddition Conditions

**Table S1.** Optimization of the [3+3] reaction conditions<sup>a,b</sup>

| Entry                 | [Pd]                                                  | Ligand      | Solvent                 | Yield (%) <sup>b</sup> | [4a:5a] <sup>c</sup> |
|-----------------------|-------------------------------------------------------|-------------|-------------------------|------------------------|----------------------|
| 1                     | [Pd(C <sub>3</sub> H <sub>5</sub> )Cl] <sub>2</sub>   | dppp        | toluene                 | 55                     | 1:>20                |
| 2                     | [Pd(C <sub>3</sub> H <sub>5</sub> )Cl] <sub>2</sub>   | dppe        | toluene                 | 26                     | 1:>20                |
| 3                     | [Pd(C <sub>3</sub> H <sub>5</sub> )Cl] <sub>2</sub>   | dppb        | toluene                 | 51                     | 1:>20                |
| 4                     | [Pd(C <sub>3</sub> H <sub>5</sub> )Cl] <sub>2</sub>   | dppf        | toluene                 | 53                     | 1:>20                |
| 5                     | [Pd(C <sub>3</sub> H <sub>5</sub> )Cl] <sub>2</sub>   | Cy-DPEphos  | toluene                 | 48                     | 1:>20                |
| 6                     | [Pd(C <sub>3</sub> H <sub>5</sub> )Cl] <sub>2</sub>   | Triphos     | toluene                 | 33                     | 1:3                  |
| 7                     | Pd2(dba) <sub>3</sub> ·CHCl <sub>3</sub>              | dppp        | toluene                 | 47                     | 1:>20                |
| 8                     | Pd(OAc) <sub>2</sub>                                  | dppp        | toluene                 | 44                     | 1:>20                |
| 9                     | [Pd(C <sub>3</sub> H <sub>5</sub> )Cl] <sub>2</sub>   | dppp        | PhCF <sub>3</sub>       | 60                     | 1:>20                |
| 10                    | [Pd(C <sub>3</sub> H <sub>5</sub> )Cl] <sub>2</sub>   | dppp        | MeCN                    | 18                     | 1:>20                |
| 11                    | [Pd(C <sub>3</sub> H <sub>5</sub> )Cl] <sub>2</sub>   | dppp        | DCE                     | 54                     | 1:>20                |
| <b>12<sup>d</sup></b> | <b>[Pd(C<sub>3</sub>H<sub>5</sub>)Cl]<sub>2</sub></b> | <b>dppp</b> | <b>PhCF<sub>3</sub></b> | <b>65</b>              | <b>1:&gt;20</b>      |
| 13 <sup>e</sup>       | [Pd(C <sub>3</sub> H <sub>5</sub> )Cl] <sub>2</sub>   | dppp        | PhCF <sub>3</sub>       | 60                     | 2:3                  |

<sup>a</sup>Reactions were carried out using **1a** (0.2 mmol), **3a** (0.4 mmol), [Pd] (5.0 mol%), ligand (10.0 mol%), K<sub>2</sub>CO<sub>3</sub> (2.0 equiv), solvent (2 ml), 90 °C, 12 h. <sup>b</sup>Isolated yields. <sup>c</sup>Regioselectivity determined by 1H-NMR analysis of crude reaction mixture. PhCF<sub>3</sub> = benzo-trifluoride. Triphos = Bis(2-diphenylphosphinoethyl)phenylphosphine. <sup>d</sup>[Pd] (2.5 mol%), ligand (5.0 mol%). <sup>e</sup>**1a** was replaced by 2-naphthol (**2a**).

As the formation of **5a** represents a new reaction, we further explored its reaction conditions (Table S1). We first investigated the effect of the bidentate ligand, yet no better results were obtained (entries 1–5). The tridentate ligand Triphos was used, but gave an unsatisfactory yield and regioselectivity (entry 6). Other palladium catalysts were tested along with dppp as ligand, but inferior performance was observed in contrast with [Pd(C<sub>3</sub>H<sub>5</sub>)Cl]<sub>2</sub> (entries 7–8). Subsequently, various solvents were explored (entries 9–11), PhCF<sub>3</sub> as the solvent slightly improved the yield. Notably, the adjustment of the catalyst/ligand loading ratio produced a higher yield (entry 12). Unfortunately, using 2-naphthol (**2a**) instead of 1-naphthol, showed a moderate yield but terrible regioselectivity (entry 13). The optimal conditions **B**: **1** (0.2 mmol), **3** (0.4 mmol), [Pd(C<sub>3</sub>H<sub>5</sub>)Cl]<sub>2</sub> (2.5 mol%), dppp (5.0 mol%), K<sub>2</sub>CO<sub>3</sub> (2.0 equiv), PhCF<sub>3</sub> (2 ml), 90 °C, 12 h.

## 4. Table S2 Control Reactions

Control reactions for [3+2] and [3+3] cycloadditions.

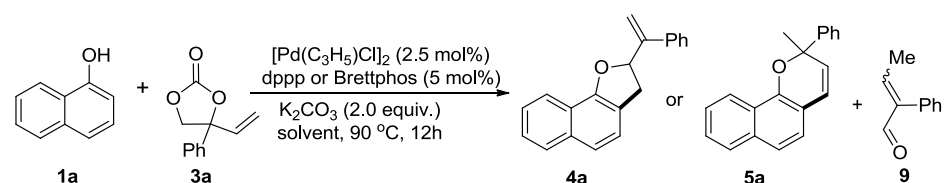

| Entry | Variation from standard reaction condition             | Yield[%] |       |       |
|-------|--------------------------------------------------------|----------|-------|-------|
|       |                                                        | 4a       | 5a    | 9     |
| 1     | without $[\text{Pd}(\text{C}_3\text{H}_5)\text{Cl}]_2$ | 0        | 0     | 0     |
| 2     | without ligand                                         | 0        | 0     | trace |
| 3     | without $\text{K}_2\text{CO}_3$                        | 0        | 0     | >95   |
| 4     | without <b>1a</b>                                      | -        | -     | >95   |
| 5     | <b>1a</b> added after 24h                              | 0        | 0     | >95   |
| 6     | <b>9</b> instead of <b>3a</b>                          | 0        | 0     | -     |
| 7     | 25 °C instead of 90 °C, 24 h                           | trace    | trace | -     |

The control reactions are shown in Table S2.

## 5. Diversification of This Protocol

Table S3. Diversification of this protocol

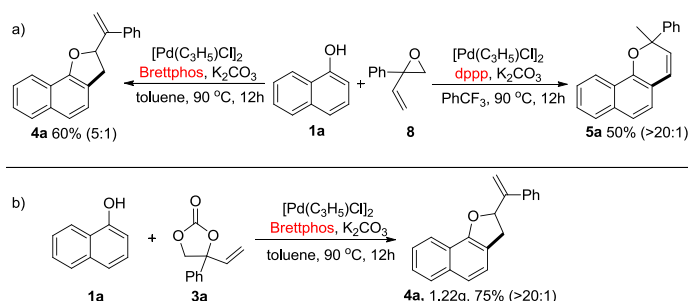

(Table S3, a) The reaction conditions: naphthols **1a** (0.20 mmol), 2-phenyl-2-vinyl-1,3-dioxolane **8** (0.4 mmol),  $[\text{Pd}(\text{C}_3\text{H}_5)\text{Cl}]_2$  (2.5 mol%), ligand (5 mol%),  $\text{K}_2\text{CO}_3$  (2 equiv.) and solvent (2 ml).

(Table S3, b) The scaled-up reaction conditions: 1-naphthol **1a** (6.0 mmol), VEC **3a** (12.0 mmol),  $[\text{Pd}(\text{C}_3\text{H}_5)\text{Cl}]_2$  (2.5 mol%), ligand (5 mol%),  $\text{K}_2\text{CO}_3$  (2 equiv.) and solvent (10 ml).

To demonstrate the diversity of this reaction, 2-phenyl-2-vinyl-1,3-dioxolane **8** was reacted with **1a** (Table S3, a). To our delight, the products **4a** and **5a** were carried out smoothly in acceptable yield. Another eminent advantage of this protocol is that the reaction could be scaled up to gram quantities, thus affording **4a** in a satisfied yield and high regioselectivity (Table S3, b).

## 6. General Procedure

### 1) Synthesis of **4**, **5**, **6**

To a Schlenk tube were added naphthols **1** or **2** (0.20 mmol), VECs **3** (0.4 mmol),



[Pd(C<sub>3</sub>H<sub>5</sub>)Cl]<sub>2</sub> (2.5 mol%), ligand (5 mol%), K<sub>2</sub>CO<sub>3</sub> (2 equiv) and solvent (2 ml). Then the tube was charged by argon, and was stirred at 90 °C for 12 h. After the reaction was finished, the mixture was quenched by water and extracted with ethyl acetate twice. The combined organic phase was washed with brine and dried over Na<sub>2</sub>SO<sub>4</sub>. The concentrated residue was purified by column chromatography over silica gel using petroleum ether/ethyl acetate 100:1 to afford the desired products **4**, **5**, **6**. **Notably, the corresponding [3+2] and [3+3] cycloaddition products have same R<sub>f</sub> value on the chromatography silica gel panel so the isolated **4**, **5**, **6** are mixture compounds.**

## 2) Synthesis of substrates **1b**, **1c-1e**, **2b**, **3**, **8**

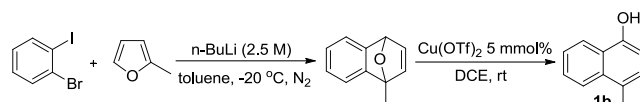

The substrate **1b** was synthesized according to the references.<sup>1</sup>

The substrates **1c-1e** were synthesized according to the reference.<sup>2</sup>

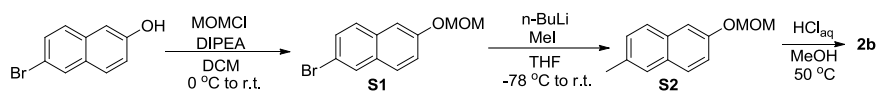

For the synthesis of **2b**: 6-bromo-2-naphthol (4.46 g, 20 mmol) was dissolved in CH<sub>2</sub>Cl<sub>2</sub> (100 mL) and diisopropylethylamine (3.8 mL, 1.1 eq.) was added. The mixture was cooled to 0 °C and chloromethyl methyl ether (1.7 mL, 1.1 eq.) was slowly added. After stirring overnight at room temperature, the reaction was quenched by methanol. The mixture was extracted with CH<sub>2</sub>Cl<sub>2</sub>, washed with brine, dried over Na<sub>2</sub>SO<sub>4</sub>, and concentrated under reduced pressure to give a crude product, which was purified by column chromatography (*n*-hexane/EtOAc = 40/1) to afford **S1** as colorless oil (5.25 g, 98%).

A solution of **S1** (4.01 g, 15.0 mmol) in THF (100 mL) was cooled to -78 °C and *n*-BuLi (10.3 mL, 1.1 eq., 1.6 M in *n*-hexane) was slowly added. After stirring for 1 h at -78 °C, iodomethane (2.3 mL, 2.5 eq.) was slowly added and warmed to room temperature. After stirring for 1 h, the mixture was quenched by sat. NH<sub>4</sub>Cl aq. The aqueous layer was extracted with EtOAc and the combined organic layers were washed with brine, dried over Na<sub>2</sub>SO<sub>4</sub> and concentrated under reduced pressure to give a crude product, which was used without further purification. **S2** was dissolved in MeOH (50 mL), warmed to 50 °C and conc. HCl aq. (35%, 15 drops) was added. After stirring for 2 h, 50 mL of water was added and the aqueous layer was extracted with EtOAc. The combined organic layers were washed with brine, dried over Na<sub>2</sub>SO<sub>4</sub>, and concentrated under reduced pressure to give a crude product of **2b**, which was purified by column chromatography (*n*-hexane/EtOAc = 20/1) to afford **2b**.

The substrates **3** were synthesized according to the references.<sup>3</sup>

The substrate **8** was synthesized according to the reference.<sup>4</sup>

## 3) References for substrates synthesis

- (a) F. Peng, B. Fan, Z. Shao, X. Pu, P. Li, H. Zhang, *Synthesis*, 2008, **2008**, 3043; (b) H. Zhou, J. Li, H. Yang, C. Xia, G. Jiang, *Org. Lett.*, 2015, **17**, 4628.
- (a) W.-G. Lee, K. M. Frey, R. Gallardo-Macias, K. A. Spasov, M. Bollini, K. S. Anderson, W. L. Jorgensen, *ACS Med.Chem. Lett.*, 2014, **5**, 1259.

- 3 (a) W. Guo, L. Martínez-Rodríguez, R. Kuniyil, E. Martin, E. C. Escudero-Adán, F. Maseras, A. W. Kleij, *J. Am. Chem. Soc.*, 2016, **138**, 11970; (b) J. Yu, D. Wang, Y. Xu, Z. Wu, C. Zhu, *Adv. Synth. Catal.*, 2018, **360**, 744.
- 4 (a) B. M. Trost, B. S. Brown, E. J. McEachern, O. Kuhn, *Chem. Eur. J.*, 2003, **9**, 4442.

## 7. Spectral Data of Products

### 2-(1-phenylvinyl)-2,3-dihydronaphtho[1,2-*b*]furan **4a**

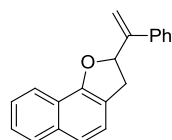

39.7mg, white solid, yield 73%, mp: 76-78 °C. <sup>1</sup>H NMR (400 MHz, CDCl<sub>3</sub>; δ, ppm): 8.06 (d, *J* = 8.8 Hz, 1H), 7.81 (d, *J* = 8.8 Hz, 1H), 7.48-7.42 (m, 4H), 7.41-7.29 (m, 4H), 7.24 (d, *J* = 9.2Hz, 1H), 5.91 (t, *J* = 9.2Hz, 1H), 5.55 (s, 1H), 5.46 (s, 1H), 3.58 (dd, *J* = 15.2 Hz, *J* = 10.0 Hz, 1H), 3.16 (dd, *J* = 15.2Hz, *J* = 10.0Hz, 1H). <sup>13</sup>C NMR (100 MHz, CDCl<sub>3</sub>; δ, ppm): 154.8, 147.7, 138.6, 134.0, 128.5, 127.9, 126.8, 125.6, 125.4, 122.9, 121.5, 120.5, 120.3, 119.2, 113.1, 84.1, 36.9. IR (neat, cm<sup>-1</sup>): 2922.6, 1630.8, 1597.3, 1518.3, 1276.2. HRMS (ESI): *m/z* calcd for C<sub>20</sub>H<sub>16</sub>O [M+H]<sup>+</sup> 273.1274, found 273.1280.

### 5-methyl-2-(1-phenylvinyl)-2,3-dihydronaphtho[1,2-*b*]furan **4b**

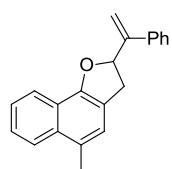

38.9mg, yellow oil, yield 68%. <sup>1</sup>H NMR (400 MHz, CDCl<sub>3</sub>; δ, ppm): 8.08 (dd, *J* = 9.6Hz, *J* = 6Hz, 1H), 7.93-7.91 (m, 1H), 7.49-7.42 (m, 4H), 7.35-7.28 (m, 3H), 7.09 (s, 1H), 5.87 (t, *J* = 7.6Hz, 1H), 5.54 (s, 1H), 5.44 (s, 1H), 3.53 (dd, *J* = 15.6Hz, *J* = 10.0Hz, 1H), 3.11 (dd, *J* = 15.6Hz, *J* = 10.0Hz, 1H), 2.59 (s, 3H). <sup>13</sup>C NMR (100 MHz, CDCl<sub>3</sub>; δ, ppm): 153.4, 147.8, 138.7, 132.5, 128.5, 127.8, 126.8, 126.4, 125.5, 125.1, 124.5, 123.4, 121.9, 120.6, 118.5, 113.0, 83.7, 37.1, 19.1. IR (neat, cm<sup>-1</sup>): 2928.7, 1631.1, 1597.4, 1494.9, 1443.8, 1365.7, 1261.2. HRMS (ESI): *m/z* calcd for C<sub>21</sub>H<sub>18</sub>O [M+H]<sup>+</sup> 287.1430, found 287.1438.

### 7-methyl-2-(1-phenylvinyl)-2,3-dihydronaphtho[1,2-*b*]furan **4c**

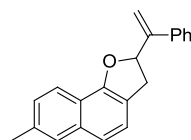

39.5mg, colorless oil, yield 69%. <sup>1</sup>H NMR (400 MHz, CDCl<sub>3</sub>; δ, ppm): 7.95 (d, *J* = 8.4Hz, 1H), 7.57 (s, 1H), 7.44-7.41 (m, 2H), 7.32-7.25 (m, 5H), 7.18 (d, *J* = 8.0Hz, 1H), 5.87 (t, *J* = 8.8Hz, 1H), 5.53 (s, 1H), 5.44 (s, 1H), 3.53 (dd, *J* = 15.2Hz, *J* = 9.6Hz, 1H), 3.11 (dd, *J* = 15.2Hz, *J* = 9.6Hz, 1H), 2.48 (s, 3H). <sup>13</sup>C NMR (100 MHz, CDCl<sub>3</sub>; δ, ppm): 154.8, 147.7, 138.6, 135.2, 134.3, 128.5, 127.8, 127.6, 126.8, 125.3, 122.9, 121.3, 119.7, 118.7, 118.3, 113.0, 84.0, 36.9, 21.8. IR (neat, cm<sup>-1</sup>): 2929.0, 1620.1, 1587.4, 1494.9, 1443.8, 1365.7, 1265.2. HRMS (ESI): *m/z* calcd for C<sub>21</sub>H<sub>18</sub>O [M+H]<sup>+</sup> 287.1430, found 287.1439.

### 7-methoxy-2-(1-phenylvinyl)-2,3-dihydronaphtho[1,2-*b*]furan **4d**

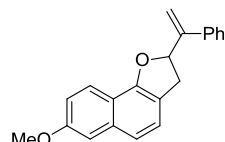

39.8mg, yellow oil, yield 69%. <sup>1</sup>H NMR (400 MHz, CDCl<sub>3</sub>; δ, ppm): 7.96 (d, *J* = 10.4Hz, 1H), 7.45-7.42 (m, 2H), 7.35-7.29 (m, 3H), 7.26-7.19 (m, 2H), 7.14-7.11 (m, 2H), 5.88 (t, *J* = 8.8Hz, 1H), 5.53 (s, 1H), 5.45 (s, 1H), 3.9 (s, 3H), 3.54 (dd, *J* = 15.2Hz, *J* = 10.0Hz, 1H), 3.12 (dd, *J* = 15.2Hz, *J* = 10.0Hz, 1H). <sup>13</sup>C NMR (100 MHz, CDCl<sub>3</sub>; δ, ppm): 157.6, 115.0, 147.7, 138.6, 135.3, 128.5, 127.9, 126.8, 123.5, 123.1, 119.1, 118.1, 117.2, 115.9, 113.1, 106.0, 84.1, 55.2, 36.8. IR (neat, cm<sup>-1</sup>): 2931.8, 1639.0, 1604.1, 1482.3, 1427.9, 1361.7, 1241.2. HRMS (ESI): *m/z* calcd for C<sub>21</sub>H<sub>18</sub>O<sub>2</sub> [M+H]<sup>+</sup> 303.1380, found 303.1386.

#### 5-fluoro-2-(1-phenylvinyl)-2,3-dihydronaphtho[1,2-*b*]furan **4f**

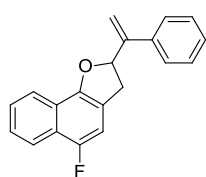

Regioselectivity 2:1, 38.1mg, colorless oil, yield 66%.  $^1\text{H}$  NMR (400 MHz,  $\text{CDCl}_3$ ;  $\delta$ , ppm): 8.02 (d,  $J = 7.6\text{Hz}$ , 2H), 7.53-7.49 (m, 4H), 7.33-7.28 (m, 4H), 5.89 (t,  $J = 8.8\text{Hz}$ , 1H), 5.53 (s, 1H), 5.45 (s, 1H), 3.54 (dd,  $J = 15.2\text{Hz}$ ,  $J = 9.6\text{Hz}$ , 1H), 3.12 (dd,  $J = 15.2\text{Hz}$ ,  $J = 9.6\text{Hz}$ , 1H).  $^{13}\text{C}$  NMR (100 MHz,  $\text{CDCl}_3$ ;  $\delta$ , ppm): 153.3 ( $J = 243\text{Hz}$ ), 147.4, 145.7, 138.4, 128.5, 128.2, 128.0, 126.8, 126.4 ( $J = 12\text{Hz}$ ), 126.8, 121.4 ( $J = 1\text{Hz}$ ), 121.0 ( $J = 4\text{Hz}$ ), 120.5, 113.4, 106.7 ( $J = 23\text{Hz}$ ), 84.1, 37.1. IR (neat,  $\text{cm}^{-1}$ ): 3061.5, 2927.6, 1630.1, 1599.8, 1404.7, 1261.7, 1061.8. HRMS (ESI):  $m/z$  calcd for  $\text{C}_{20}\text{H}_{15}\text{FO}$   $[\text{M}+\text{H}]^+$  291.1180, found 291.1184.

#### 2,7-bis(1-phenylvinyl)-2,3,6,7-tetrahydronaphtho[1,2-*b*:6,5-*b'*]difuran **4g**

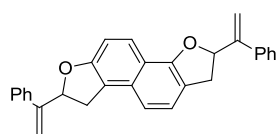

43.3mg, yellow oil, yield 52%.  $^1\text{H}$  NMR (400 MHz,  $\text{CDCl}_3$ ;  $\delta$ , ppm): 7.96 (d,  $J = 8.8\text{Hz}$ , 1H), 7.46-7.42 (m, 4H), 7.35-7.30 (m, 6H), 7.20-7.17 (m, 2H), 6.97 (d,  $J = 8\text{Hz}$ , 1H), 5.87 (t,  $J = 8.8\text{Hz}$ , 2H), 5.53 (s, 1H), 5.52 (s, 1H), 5.46 (s, 1H), 5.45 (s, 1H), 3.64 (dd,  $J = 15.2\text{Hz}$ ,  $J = 10.0\text{Hz}$ , 1H), 3.52 (dd,  $J = 15.2\text{Hz}$ ,  $J = 10.0\text{Hz}$ , 1H), 3.25-3.18 (m, 1H), 3.12-3.06 (m, 1H).  $^{13}\text{C}$  NMR (100 MHz,  $\text{CDCl}_3$ ;  $\delta$ , ppm): 157.0, 155.6, 147.6, 138.5, 131.5, 128.5, 128.4, 127.9, 127.8, 126.8, 123.9, 122.7, 118.2, 116.4, 116.3, 115.1, 113.1, 113.0, 11.4, 84.0, 83.9, 83.8, 83.7, 36.7, 35.4. IR (neat,  $\text{cm}^{-1}$ ): 2925.4, 1640.0, 1599.4, 1494.9, 1444.9, 1244.7. HRMS (ESI):  $m/z$  calcd for  $\text{C}_{30}\text{H}_{24}\text{O}_2$   $[\text{M}+\text{H}]^+$  417.1849, found 417.1861.

#### 2-(1-(*p*-tolyl)vinyl)-2,3-dihydronaphtho[1,2-*b*]furan **4h**

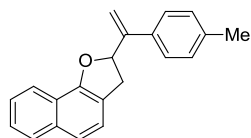

40.0mg, yellow solid, yield 70%, mp: 110-112°C.  $^1\text{H}$  NMR (400 MHz,  $\text{CDCl}_3$ ;  $\delta$ , ppm): 8.06 (d,  $J = 7.6\text{Hz}$ , 1H), 7.80 (d,  $J = 8.8\text{Hz}$ , 1H), 7.46-7.42 (m, 2H), 7.37-7.32 (m, 3H), 7.25-7.21 (m, 1H), 7.14 (d,  $J = 8\text{Hz}$ , 2H), 5.89 (t,  $J = 8.8\text{Hz}$ , 1H), 5.50 (m, 1H), 5.43 (s, 1H), 3.57 (dd,  $J = 15.6\text{Hz}$ ,  $J = 10.0\text{Hz}$ , 1H), 3.14 (dd,  $J = 15.6\text{Hz}$ ,  $J = 10.0\text{Hz}$ , 1H), 2.34 (s, 3H).  $^{13}\text{C}$  NMR (100 MHz,  $\text{CDCl}_3$ ;  $\delta$ , ppm): 154.8, 147.4, 137.7, 135.6, 134.0, 129.2, 127.9, 126.6, 125.6, 125.3, 122.9, 121.4, 120.5, 120.3, 119.3, 112.3, 84.0, 37.0, 21.1. IR (neat,  $\text{cm}^{-1}$ ): 2920.2, 1629.7, 1595.6, 1513.6, 1440.9, 1376.6, 1279.6. HRMS (ESI):  $m/z$  calcd for  $\text{C}_{21}\text{H}_{18}\text{O}$   $[\text{M}+\text{H}]^+$  287.1430, found 287.1442.

#### 2-(1-(4-methoxyphenyl)vinyl)-2,3-dihydronaphtho[1,2-*b*]furan **4i**

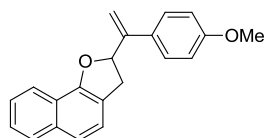

42.9mg, yellow solid, yield 71%, mp: 118-120 °C.  $^1\text{H}$  NMR (400 MHz,  $\text{CDCl}_3$ ;  $\delta$ , ppm): 8.05 (d,  $J = 7.6\text{Hz}$ , 1H), 7.80 (d,  $J = 8.8\text{Hz}$ , 1H), 7.45-7.41 (m, 2H), 7.38-7.35 (m, 3H), 7.24-7.21 (m, 1H), 6.85 (d,  $J = 8.8\text{Hz}$ , 1H), 5.86 (t,  $J = 8.8\text{Hz}$ , 1H), 5.46 (s, 1H), 5.38 (s, 1H), 3.78 (s, 3H), 3.56 (dd,  $J = 15.6\text{Hz}$ ,  $J = 10.0\text{Hz}$ , 1H), 3.15 (dd,  $J = 15.6\text{Hz}$ ,  $J = 10.0\text{Hz}$ , 1H).  $^{13}\text{C}$  NMR (100 MHz,  $\text{CDCl}_3$ ;  $\delta$ , ppm): 159.4, 154.8, 146.9, 134.0, 130.9, 127.9, 127.8, 125.6, 125.3, 122.8, 121.4, 120.5, 120.3, 119.3, 113.9, 111.7, 84.2, 55.2, 36.9. IR (neat,  $\text{cm}^{-1}$ ): 2922.5, 1606.5, 1512.7, 1440.6, 1377.3, 1283.5, 1249.2. HRMS (ESI):  $m/z$  calcd for  $\text{C}_{21}\text{H}_{18}\text{O}_2$   $[\text{M}+\text{H}]^+$  303.1380, found 303.1388.

#### 2-(1-(4-(*tert*-butyl)phenyl)vinyl)-2,3-dihydronaphtho[1,2-*b*]furan **4j**

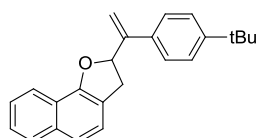

47.9mg, yellow solid, yield 73%, mp: 139-141 °C. <sup>1</sup>H NMR (400 MHz, CDCl<sub>3</sub>; δ, ppm): 8.06 (d, *J* = 7.6Hz, 1H), 7.79 (d, *J* = 8.8Hz, 1H), 7.45-7.40 (m, 2H), 7.39-7.33 (m, 5H), 7.23 (d, *J* = 8.0Hz, 1H), 5.89 (t, *J* = 8.8Hz, 1H), 5.50 (s, 1H), 5.45 (s, 1H), 3.57 (dd, *J* = 15.2Hz, 10.0Hz, 1H), 3.15 (dd, *J* = 15.2Hz, 10.0Hz, 1H), 1.31 (s, 9H). <sup>13</sup>C NMR (100 MHz, CDCl<sub>3</sub>; δ, ppm): 154.8, 150.9, 147.3, 135.4, 134.0, 127.9, 126.3, 125.6, 125.4, 125.3, 122.9, 121.5, 120.5, 120.3, 119.3, 112.2, 84.0, 37.1, 34.5, 31.3. IR (neat, cm<sup>-1</sup>): 2961.7, 1629.4, 1596.2, 1513.8, 1441.1, 1376.4, 1270.5, 1075.4. HRMS (ESI): *m/z* calcd for C<sub>24</sub>H<sub>14</sub>O [M+H]<sup>+</sup> 329.1900, found 329.1910.

#### 2-(1-(3-methoxyphenyl)vinyl)-2,3-dihydronaphtho[1,2-*b*]furan **4k**

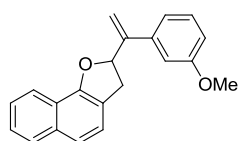

41.7mg, yellow oil, yield 63%. <sup>1</sup>H NMR (400 MHz, CDCl<sub>3</sub>; δ, ppm): 8.06 (d, *J* = 8.4Hz, 1H), 7.80 (d, *J* = 7.6Hz, 1H), 7.47-7.40 (m, 2H), 7.36 (d, *J* = 8.4Hz, 1H), 7.26-7.21 (m, 2H), 7.02 (d, *J* = 7.6Hz, 1H), 6.99 (d, *J* = 2.4Hz, 1H), 6.85-6.82 (m, 1H), 5.90-5.86 (m, 1H), 5.54 (d, *J* = 1.2Hz, 1H), 5.46 (s, 1H), 3.71 (s, 3H), 3.57 (dd, *J* = 15.2Hz, *J* = 10.0Hz, 1H), 3.14 (dd, *J* = 15.2Hz, *J* = 10.0Hz, 1H). <sup>13</sup>C NMR (100 MHz, CDCl<sub>3</sub>; δ, ppm): 159.6, 154.7, 147.5, 140.0, 133.9, 129.5, 127.9, 125.6, 125.3, 122.8, 121.4, 120.4, 120.3, 119.3, 119.2, 113.3, 113.2, 112.6, 84.0, 55.1, 36.9. IR (neat, cm<sup>-1</sup>): 3055.9, 2935.1, 1596.6, 1488.3, 1440.9, 1377.4, 1282.9, 1225.6. HRMS (ESI): *m/z* calcd for C<sub>21</sub>H<sub>18</sub>O<sub>2</sub> [M+H]<sup>+</sup> 303.1380, found 303.1389.

#### 2-(1-(4-fluorophenyl)vinyl)-2,3-dihydronaphtho[1,2-*b*]furan **4m**

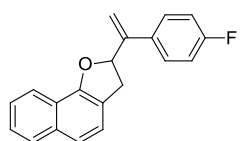

Regioselectivity 14:1, 41.2mg, yellow solid, yield 71%, mp: 108-110 °C. <sup>1</sup>H NMR (400 MHz, CDCl<sub>3</sub>; δ, ppm): 8.04 (d, *J* = 7.6Hz, 1H), 7.80 (d, *J* = 9.2Hz, 1H), 7.46-7.42 (m, 2H), 7.42-7.35 (m, 3H), 7.23 (d, *J* = 8Hz, 1H), 7.02-6.98 (m, 2H), 5.83 (t, *J* = 9.2Hz, 1H), 5.52 (s, 1H), 5.40 (s, 1H), 3.54 (dd, *J* = 15.6Hz, *J* = 10.0Hz, 1H), 3.12 (dd, *J* = 15.6Hz, *J* = 10.0Hz, 1H). <sup>13</sup>C NMR (100 MHz, CDCl<sub>3</sub>; δ, ppm): 162.5(d, *J* = 242.6Hz,) 161.3, 154.6, 146.6, 134.5 (d, *J* = 3.3Hz), 134.0, 128.5 (d, *J* = 8.0Hz), 127.9, 125.7, 125.4, 122.8, 121.4, 120.5, 120.4, 119.2, 115.4 (d, *J* = 21.3Hz), 113.6, 84.2, 36.7. IR (neat, cm<sup>-1</sup>): 2921.5, 1631.6, 1509.3, 1441.0, 1235.5, 1075.2. HRMS (ESI): *m/z* calcd for C<sub>20</sub>H<sub>15</sub>FO [M+H]<sup>+</sup> 291.1180, found 291.1190.

#### 2-(1-(4-(trifluoromethyl)phenyl)vinyl)-2,3-dihydronaphtho[1,2-*b*]furan **4n**

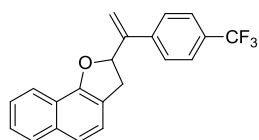

42.8mg, yellow solid, yield 63%, mp: 138-140 °C. <sup>1</sup>H NMR (400 MHz, CDCl<sub>3</sub>; δ, ppm): 8.04 (d, *J* = 7.6Hz, 1H), 7.81 (d, *J* = 8.8Hz, 1H), 7.58-7.51 (m, 4H), 7.46-7.44 (m, 2H), 7.43-7.37 (m, 1H), 7.24 (d, *J* = 8.4Hz, 1H), 5.86 (t, *J* = 9.2Hz, 1H), 5.63 (s, 1H), 5.51 (s, 1H), 3.56 (dd, *J* = 15.2Hz, 10.0Hz, 1H), 3.12 (dd, *J* = 15.2Hz, 10.0Hz, 1H). <sup>13</sup>C NMR (100 MHz, CDCl<sub>3</sub>; δ, ppm): 154.5, 146.6, 142.1, 134.0, 129.9 (*J* = 33Hz), 127.9, 127.2, 126.7 (*J* = 292Hz), 125.8, 125.5, 125.4 (*J* = 4Hz), 122.8, 121.3, 120.6, 120.4, 119.0, 115.5, 83.8, 36.7. IR (neat, cm<sup>-1</sup>): 2928.7, 1615.6, 1596.4, 1517.9, 1440.6, 1282.5, 1066.8. HRMS (ESI): *m/z* calcd for C<sub>21</sub>H<sub>15</sub>F<sub>3</sub>O [M+H]<sup>+</sup> 341.1148, found 341.1161.

#### 2-(1-(naphthalen-2-yl)vinyl)-2,3-dihydronaphtho[1,2-*b*]furan **4o**

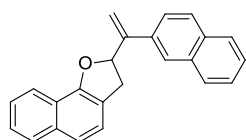

45.1mg, yellow solid, yield 70%, mp: 104-106 °C.  $^1\text{H}$  NMR (400 MHz,  $\text{CDCl}_3$ ;  $\delta$ , ppm): 8.10 (d,  $J = 8\text{Hz}$ , 1H), 7.85-7.78 (m, 5H), 7.61-7.58 (m, 1H), 7.47-7.45 (m, 4H), 7.38 (d,  $J = 8\text{Hz}$ , 1H), 7.25-7.21 (m, 1H), 6.04 (t,  $J = 8.4\text{Hz}$ , 1H), 5.65 (s, 1H), 5.60 (s, 1H), 3.63 (dd,  $J = 15.6\text{Hz}$ ,  $J = 10.0\text{Hz}$ , 1H), 3.19 (dd,  $J = 15.6\text{Hz}$ ,  $J = 10.0\text{Hz}$ , 1H).  $^{13}\text{C}$  NMR (100 MHz,  $\text{CDCl}_3$ ;  $\delta$ , ppm): 154.7, 147.5, 135.9, 134.0, 133.3, 132.9, 128.2, 128.1, 127.9, 127.6, 126.3, 126.1, 125.7, 125.5, 125.4, 125.0, 122.9, 121.4, 120.5, 120.4, 119.2, 113.4, 83.8, 37.1. IR (neat,  $\text{cm}^{-1}$ ): 2925.6, 1626.9, 1595.9, 1517.6, 1440.6, 1279.4. HRMS (ESI):  $m/z$  calcd for  $\text{C}_{24}\text{H}_{18}\text{O}$   $[\text{M}+\text{H}]^+$  323.1430, found 323.1440.

**2-(1-(benzo[d][1,3]dioxol-5-yl)vinyl)-2,3-dihydronaphtho[1,2-b]furan 4p**

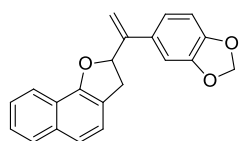

39.2mg, yellow solid, yield 62%, mp: 138-140 °C.  $^1\text{H}$  NMR (400 MHz,  $\text{CDCl}_3$ ;  $\delta$ , ppm): 8.06-8.04 (m, 1H), 7.81-7.79 (m, 1H), 7.47-7.42 (m, 2H), 7.37 (d,  $J = 8\text{Hz}$ , 1H), 7.26-7.22 (m, 1H), 6.95 (d,  $J = 1.6\text{Hz}$ , 1H), 6.92-6.89 (m, 1H), 6.77 (d,  $J = 8\text{Hz}$ , 1H), 5.94 (s, 2H), 5.82 (t,  $J = 9.2\text{Hz}$ , 1H), 5.47 (s, 1H), 5.36 (s, 1H), 3.56 (dd,  $J = 15.2\text{Hz}$ ,  $J = 10.0\text{Hz}$ , 1H), 3.15 (dd,  $J = 15.2\text{Hz}$ ,  $J = 10.0\text{Hz}$ , 1H).  $^{13}\text{C}$  NMR (100 MHz,  $\text{CDCl}_3$ ;  $\delta$ , ppm): 154.7, 147.8, 147.3, 147.1, 133.9, 132.7, 127.9, 125.6, 125.3, 122.8, 121.4, 120.5, 120.3, 119.2, 108.2, 107.4, 101.1, 84.1, 36.9. IR (neat,  $\text{cm}^{-1}$ ): 3056.7, 2917.4, 1596.2, 1503.3, 1442.2, 1278.6, 1039.2. HRMS (ESI):  $m/z$  calcd for  $\text{C}_{21}\text{H}_{16}\text{O}_3$   $[\text{M}+\text{H}]^+$  317.1172, found 317.1184.

**2-(1-(thiophen-2-yl)vinyl)-2,3-dihydronaphtho[1,2-b]furan 4q**

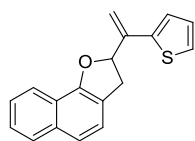

32.2mg, yellow oil, yield 58%.  $^1\text{H}$  NMR (400 MHz,  $\text{CDCl}_3$ ;  $\delta$ , ppm): 8.06-8.03 (m, 1H), 7.82-7.80 (m, 1H), 7.47-7.42 (m, 2H), 7.41-7.38 (m, 1H), 7.27 (d,  $J = 8\text{Hz}$ , 1H), 7.22-7.19 (m, 1H), 7.06 (d,  $J = 1.2\text{Hz}$ , 1H), 7.05 (d,  $J = 1.2\text{Hz}$ , 1H), 6.97 (d,  $J = 3.6\text{Hz}$ , 1H), 6.95 (d,  $J = 1.2\text{Hz}$ , 1H), 5.81 (t,  $J = 8.8\text{Hz}$ , 1H), 5.55 (s, 1H), 5.42 (s, 1H), 3.68 (dd,  $J = 15.2\text{Hz}$ ,  $J = 10.0\text{Hz}$ , 1H), 3.30 (dd,  $J = 15.2\text{Hz}$ ,  $J = 10.0\text{Hz}$ , 1H).  $^{13}\text{C}$  NMR (100 MHz,  $\text{CDCl}_3$ ;  $\delta$ , ppm): 154.7, 141.3, 141.1, 134.0, 127.9, 127.4, 125.7, 125.4, 124.9, 124.2, 122.8, 121.4, 120.5, 120.4, 119.3, 111.8, 84.0, 37.2. IR (neat,  $\text{cm}^{-1}$ ): 3054.1, 2924.4, 1596.6, 1517.7, 1440.3, 1280.1. HRMS (ESI):  $m/z$  calcd for  $\text{C}_{18}\text{H}_{14}\text{OS}$   $[\text{M}+\text{H}]^+$  279.0838, found 279.0847.

**2-methyl-2-phenyl-2H-benzo[h]chromene 5a**

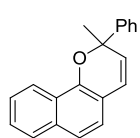

35.4mg, yellow oil, yield 65%.  $^1\text{H}$  NMR (400 MHz,  $\text{CDCl}_3$ ;  $\delta$ , ppm): 8.25-8.22 (m, 1H), 7.71-7.69 (m, 1H), 7.45-7.38 (m, 2H), 7.33 (d,  $J = 8.4\text{Hz}$ , 1H), 7.17 (d,  $J = 1.2\text{Hz}$ , 1H), 7.14 (d,  $J = 8.4\text{Hz}$ , 1H), 7.06-7.05 (m, 1H), 6.89-6.86 (m, 1H), 6.61 (d,  $J = 9.6\text{Hz}$ , 1H), 5.92 (d,  $J = 9.6\text{Hz}$ , 1H), 1.99 (s, 3H).  $^{13}\text{C}$  NMR (100 MHz,  $\text{CDCl}_3$ ;  $\delta$ , ppm): 148.1, 146.0, 134.5, 128.2, 128.1, 127.6, 127.2, 126.2, 125.5, 124.8, 124.6, 124.5, 123.3, 121.9, 120.2, 115.4, 79.4, 29.7. IR (neat,  $\text{cm}^{-1}$ ): 2927.5, 1638.1, 1610.6, 1508.3, 1448.4, 1385.2, 1275.6. HRMS (ESI):  $m/z$  calcd for  $\text{C}_{20}\text{H}_{16}\text{O}$   $[\text{M}+\text{H}]^+$  273.1274, found 273.1278.

**2,6-dimethyl-2-phenyl-2H-benzo[h]chromene 5b**

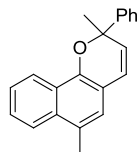

32mg, yellow oil, yield 56%.  $^1\text{H}$  NMR (400 MHz,  $\text{CDCl}_3$ ;  $\delta$ , ppm): 8.36 (d,  $J = 9.6\text{Hz}$ , 1H), 7.85 (d,  $J = 9.2\text{Hz}$ , 1H), 7.54 (d,  $J = 7.6\text{Hz}$ , 2H), 7.49-7.47 (m, 2H), 7.26 (d,  $J = 15.2\text{Hz}$ , 2H), 7.22-7.18 (m, 1H), 6.95 (s, 1H), 6.51 (d,  $J = 9.6\text{Hz}$ , 1H), 5.96 (d,  $J = 9.6\text{Hz}$ , 1H), 2.54 (s, 3H), 1.85 (s, 3H).  $^{13}\text{C}$  NMR (100 MHz,  $\text{CDCl}_3$ ;  $\delta$ , ppm): 146.7, 146.2, 133.4, 131.7, 128.7, 128.2, 127.1, 126.1, 126.0,

125.2, 125.0, 124.9, 124.1, 123.3, 122.4, 115.0, 79.2, 29.7, 18.7. IR (neat,  $\text{cm}^{-1}$ ): 2927.5, 1640.1, 1601.6, 1508.3, 1448.4, 1383.2, 1275.0. HRMS (ESI):  $m/z$  calcd for  $\text{C}_{21}\text{H}_{18}\text{O}$   $[\text{M}+\text{H}]^+$  287.1430, found 287.1439.

**2,8-dimethyl-2-phenyl-2H-benzo[h]chromene 5c**

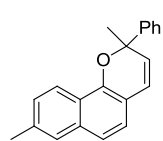

28.6mg, yellow oil, yield 50%.  $^1\text{H}$  NMR (400 MHz,  $\text{CDCl}_3$ ;  $\delta$ , ppm): 8.22 (d,  $J = 8.8\text{Hz}$ , 1H), 7.55-7.53 (m, 2H), 7.30 (s, 1H), 7.29-7.25 (m, 3H), 7.23-7.19 (m, 2H), 7.06 (d,  $J = 8.4\text{Hz}$ , 1H), 6.53 (d,  $J = 9.6\text{Hz}$ , 1H), 5.94 (d,  $J = 9.6\text{Hz}$ , 1H), 2.48 (s, 3H), 1.85 (s, 3H).  $^{13}\text{C}$  NMR (100 MHz,  $\text{CDCl}_3$ ;  $\delta$ , ppm): 148.3, 146.2, 135.9, 134.9, 128.2, 127.7, 127.1, 126.7, 125.5, 124.9, 124.6, 123.4, 121.9, 121.8, 119.6, 114.8, 79.4, 29.7, 21.7. IR (neat,  $\text{cm}^{-1}$ ): 2927.5, 1640.1, 1601.6, 1508.3, 1448.4, 1383.2, 1275.0. HRMS (ESI):  $m/z$  calcd for  $\text{C}_{21}\text{H}_{18}\text{O}$   $[\text{M}+\text{H}]^+$  287.1430, found 287.1440.

**8-methoxy-2-methyl-2-phenyl-2H-benzo[h]chromene 5d**

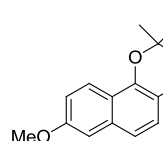

28.4mg, yellow oil, yield 50%.  $^1\text{H}$  NMR (400 MHz,  $\text{CDCl}_3$ ;  $\delta$ , ppm): 8.23 (d,  $J = 9.2\text{Hz}$ , 1H), 7.54 (d,  $J = 8.4\text{Hz}$ , 1H), 7.30-7.26 (m, 2H), 7.21-7.19 (m, 2H), 7.14 (d,  $J = 2.4\text{Hz}$ , 1H), 7.07 (d,  $J = 8.4\text{Hz}$ , 1H), 7.03 (d,  $J = 2.4\text{Hz}$ , 1H), 6.53 (d,  $J = 9.6\text{Hz}$ , 1H), 5.92 (d,  $J = 9.6\text{Hz}$ , 1H), 3.90 (s, 3H), 1.85 (s, 3H).  $^{13}\text{C}$  NMR (100 MHz,  $\text{CDCl}_3$ ;  $\delta$ , ppm): 158.1, 148.5, 146.2, 136.0, 128.2, 127.2, 127.1, 125.3, 124.9, 123.7, 123.3, 120.0, 119.0, 118.1, 113.9, 105.9, 79.4, 55.3, 29.7. IR (neat,  $\text{cm}^{-1}$ ): 2931.1, 1618.8, 1572.2, 1481.7, 1439.2, 1372.1, 1267.5. HRMS (ESI):  $m/z$  calcd for  $\text{C}_{21}\text{H}_{18}\text{O}_2$   $[\text{M}+\text{H}]^+$  303.1380, found 303.1387.

**8-chloro-2-methyl-2-phenyl-2H-benzo[h]chromene 5e**

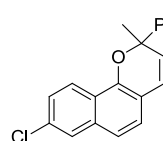

21.4mg, yellow oil, yield 35%.  $^1\text{H}$  NMR (400 MHz,  $\text{CDCl}_3$ ;  $\delta$ , ppm): 8.25 (d,  $J = 9.2\text{Hz}$ , 1H), 7.69 (d,  $J = 2\text{Hz}$ , 1H), 7.53 (d,  $J = 7.2\text{Hz}$ , 1H), 7.41 (d,  $J = 2\text{H}$ , 1H), 7.39 (d,  $J = 2\text{Hz}$ , 1H), 7.30 (t,  $J = 7.6\text{Hz}$ , 2H), 7.23-7.21 (m, 1H), 7.13 (d,  $J = 8\text{Hz}$ , 1H), 6.55 (d,  $J = 9.6\text{Hz}$ , 1H), 5.99 (d,  $J = 9.6\text{Hz}$ , 1H), 1.87 (s, 3H).  $^{13}\text{C}$  NMR (100 MHz,  $\text{CDCl}_3$ ;  $\delta$ , ppm): 148.3, 145.8, 135.2, 132.1, 128.7, 128.5, 128.3, 127.3, 126.4, 126.3, 125.8, 124.8, 123.7, 123.0, 122.9, 119.3, 115.8, 79.7, 29.6. IR (neat,  $\text{cm}^{-1}$ ): 2927.0, 1611.6, 1589.0, 1493.2, 1446.8, 1384.0, 1264.0, 763.3. HRMS (ESI):  $m/z$  calcd for  $\text{C}_{20}\text{H}_{15}\text{ClO}$   $[\text{M}+\text{H}]^+$  307.0884, found 307.0891.

**6-fluoro-2-methyl-2-phenyl-2H-benzo[h]chromene 5f**

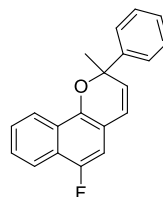

23.6mg, yellow oil, yield 41%.  $^1\text{H}$  NMR (400 MHz,  $\text{CDCl}_3$ ;  $\delta$ , ppm): 8.31 ( $J = 7.6\text{Hz}$ , 1H), 7.97 ( $J = 8.0\text{Hz}$ , 1H), 7.55-7.48 (m, 4H), 7.29 (t,  $J = 8\text{Hz}$ , 2H), 7.21 (t,  $J = 7.2\text{Hz}$ , 1H), 6.81 (d,  $J = 10.4\text{Hz}$ , 1H), 6.51 (d,  $J = 9.6\text{Hz}$ , 1H), 6.04 (d,  $J = 10.0\text{Hz}$ , 1H), 1.86 (s, 3H).  $^{13}\text{C}$  NMR (100 MHz,  $\text{CDCl}_3$ ;  $\delta$ , ppm): 152.9 ( $J = 243\text{Hz}$ ), 145.7, 144.1, 129.1, 128.2, 127.3, 126.4, 125.4 ( $J = 5\text{Hz}$ ), 124.8, 124.1 ( $J = 18\text{Hz}$ ), 122.9, 121.9 ( $J = 2\text{Hz}$ ), 114.9 ( $J = 8\text{Hz}$ ), 107.4 ( $J = 22\text{Hz}$ ), 79.3, 29.6. IR (neat,  $\text{cm}^{-1}$ ): 3061.2, 2955.0, 1650.3, 1603.3, 1406.1, 1273.7, 1060.8. HRMS (ESI):  $m/z$  calcd for  $\text{C}_{20}\text{H}_{15}\text{FO}$   $[\text{M}+\text{H}]^+$  291.1180, found 291.1181.

**2,7-dimethyl-2-phenyl-2,7-dihydropyrano[2,3-e]indole 5g**

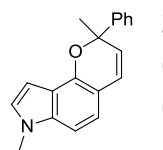

24.8mg, yellow oil, yield 45%.  $^1\text{H}$  NMR (400 MHz,  $\text{CDCl}_3$ ;  $\delta$ , ppm): 7.56-7.54 (m, 1H), 7.29-7.25 (m, 2H), 7.19-7.17 (m, 1H), 6.94 (d,  $J = 3.2\text{ Hz}$ , 1H), 6.84 (d,  $J = 8\text{Hz}$ , 1H), 6.78 (d,  $J = 8.4\text{Hz}$ , 1H), 6.65-6.64 (m, 1H), 6.53 (d,  $J = 10\text{Hz}$ , 1H), 5.81 (d,  $J = 10\text{Hz}$ , 1H), 3.70 (s, 3H), 1.82 (s, 3H).  $^{13}\text{C}$  NMR (100 MHz,

C<sub>3</sub>D<sub>6</sub>O;  $\delta$ , ppm): 148.1, 147.3, 139.9, 129.7, 128.9, 127.9, 126.2, 125.9, 124.9, 121.6, 119.5, 112.5, 103.4, 98.6, 79.5, 33.2. IR (neat, cm<sup>-1</sup>): 2930.0, 1605.6, 1590.0, 1488.2, 1445.0, 1384.0, 1264.0, 1120.0. HRMS (ESI):  $m/z$  calcd for C<sub>19</sub>H<sub>17</sub>NO [M+H]<sup>+</sup> 277.1416, found 277.1405.

#### 2-methyl-2-(*p*-tolyl)-2H-benzo[*h*]chromene **5h**

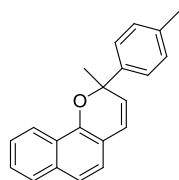

30.9mg, yellow oil, yield 54%. <sup>1</sup>H NMR (400 MHz, CDCl<sub>3</sub>;  $\delta$ , ppm): 8.31 (d,  $J$  = 8.4Hz, 1H), 7.70 (d,  $J$  = 8.0Hz, 1H), 7.46-7.41 (m, 4H), 7.30 (d,  $J$  = 8.4Hz, 1H), 7.11-7.07 (m, 1H), 6.55-6.52 (d,  $J$  = 9.6Hz, 1H), 5.95 (d,  $J$  = 10.0Hz, 1H), 2.26 (s, 3H), 1.85 (s, 3H). <sup>13</sup>C NMR (100 MHz, CDCl<sub>3</sub>;  $\delta$ , ppm): 148.2, 143.1, 136.9, 134.5, 128.9, 128.2, 127.6, 126.1, 125.4, 124.8, 124.7, 124.5, 123.2, 121.9, 120.1, 115.5, 79.3, 29.6, 21.0. IR (neat, cm<sup>-1</sup>): 2914.9, 1644.7, 1616.1, 1510.1, 1464.1, 1385.4, 1268.4. HRMS (ESI):  $m/z$  calcd for C<sub>21</sub>H<sub>18</sub>O [M+H]<sup>+</sup> 287.1430, found 287.1440.

#### 2-(4-methoxyphenyl)-2-methyl-2H-benzo[*h*]chromene **5i**

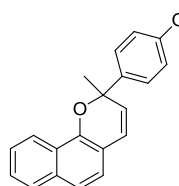

26.6mg, yellow oil, yield 44%. <sup>1</sup>H NMR (400 MHz, CDCl<sub>3</sub>;  $\delta$ , ppm): 8.29 (d,  $J$  = 8Hz, 1H), 7.70 (d,  $J$  = 7.6Hz, 1H), 7.48-7.41 (m, 4H), 7.31 (d,  $J$  = 8.4Hz, 1H), 7.11 (d,  $J$  = 8.4Hz, 1H), 6.81 (d,  $J$  = 8.8Hz, 1H), 6.55 (d,  $J$  = 10.0Hz, 1H), 5.94 (d,  $J$  = 9.6Hz, 1H), 3.72 (s, 3H), 1.85 (s, 3H). <sup>13</sup>C NMR (100 MHz, CDCl<sub>3</sub>;  $\delta$ , ppm): 158.7, 148.2, 138.1, 134.5, 128.3, 127.6, 126.2, 126.1, 125.4, 124.8, 124.5, 123.2, 121.9, 120.1, 115.5, 113.6, 79.2, 55.2, 29.5. IR (neat, cm<sup>-1</sup>): 2930.1, 1644.2, 1609.4, 1510.2, 1463.9, 1382.5, 1268.7, 1250.4. HRMS (ESI):  $m/z$  calcd for C<sub>21</sub>H<sub>18</sub>O<sub>2</sub> [M+H]<sup>+</sup> 303.1380, found 303.1387.

#### 2-(4-(*tert*-butyl)phenyl)-2-methyl-2H-benzo[*h*]chromene **5j**

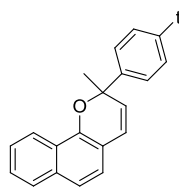

36.1mg, yellow solid, yield 55%, mp: 92-94 °C. <sup>1</sup>H NMR (400 MHz, CDCl<sub>3</sub>;  $\delta$ , ppm): 8.32 (d,  $J$  = 8.4Hz, 1H), 7.72 (d,  $J$  = 8.0Hz, 1H), 7.48-7.42 (m, 4H), 7.32-7.29 (m, 2H), 7.11 (d,  $J$  = 8.4Hz, 1H), 6.53 (d,  $J$  = 10.0Hz, 1H), 5.96 (d,  $J$  = 9.6Hz, 1H), 1.86 (s, 3H), 1.26 (s, 9H). <sup>13</sup>C NMR (100 MHz, CDCl<sub>3</sub>;  $\delta$ , ppm): 149.9, 148.2, 143.0, 134.5, 128.3, 127.6, 126.1, 125.4, 125.2, 124.7, 124.6, 124.5, 123.0, 122.0, 120.1, 115.4, 79.4, 34.4, 31.3, 29.6. IR (neat, cm<sup>-1</sup>): 2925.9, 1645.4, 1616.7, 1509.0, 1463.4, 1386.5, 1268.8, 1104.0. HRMS (ESI):  $m/z$  calcd for C<sub>24</sub>H<sub>24</sub>O [M+H]<sup>+</sup> 329.1900, found 329.1911.

#### 2-(4-fluorophenyl)-2-methyl-2H-benzo[*h*]chromene **5k**

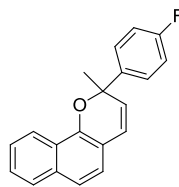

34.8mg, yellow oil, yield 60%. <sup>1</sup>H NMR (400 MHz, CDCl<sub>3</sub>;  $\delta$ , ppm): 8.30-8.28 (m, 1H), 7.73-7.70 (m, 1H), 7.52-7.47 (m, 4H), 7.52-7.40 (m, 1H), 7.32 (d,  $J$  = 8.0Hz, 1H), 7.11 (d,  $J$  = 8.4Hz, 1H), 6.97-6.93 (m, 2H), 6.57 (d,  $J$  = 9.6Hz, 1H), 5.93 (d,  $J$  = 9.6Hz, 1H), 1.84 (s, 3H). <sup>13</sup>C NMR (100 MHz, CDCl<sub>3</sub>;  $\delta$ , ppm): 161.9 ( $J$  = 244Hz), 148.0, 141.7 ( $J$  = 3Hz), 134.6, 127.8, 127.7, 126.7 ( $J$  = 8Hz), 126.3, 125.6, 124.7, 124.5, 123.6, 121.8, 121.8, 120.4, 115.4, 115.0 ( $J$  = 21Hz), 78.9, 29.7. IR (neat, cm<sup>-1</sup>): 2928.8, 1644.9, 1602.5, 1507.7, 1464.8, 1385.8, 1228.4, 1108.4. HRMS (ESI):  $m/z$  calcd for C<sub>20</sub>H<sub>15</sub>FO [M+H]<sup>+</sup> 291.1180, found 291.1191.

#### 2-(4-chlorophenyl)-2-methyl-2H-benzo[*h*]chromene **5l**

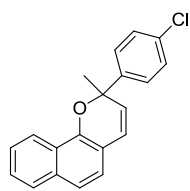

24.5mg, yellow oil, yield 40%.  $^1\text{H}$  NMR (400 MHz,  $\text{CDCl}_3$ ;  $\delta$ , ppm): 8.29 (d,  $J = 8.4\text{Hz}$ , 1H), 7.73 (d,  $J = 7.6\text{Hz}$ , 1H), 7.49-7.46 (m, 3H), 7.33 (d,  $J = 8.0\text{Hz}$ , 1H), 7.24 (d,  $J = 8.4\text{Hz}$ , 1H), 7.12 (d,  $J = 8.4\text{Hz}$ , 1H), 6.59 (d,  $J = 9.6\text{Hz}$ , 1H), 5.95 (d,  $J = 9.6\text{Hz}$ , 1H), 1.85 (s, 3H).  $^{13}\text{C}$  NMR (100 MHz,  $\text{CDCl}_3$ ;  $\delta$ , ppm): 148.0, 144.6, 134.6, 133.1, 128.4, 127.7, 127.5, 126.4, 126.3, 125.6, 124.6, 124.4, 123.8, 121.8, 120.5, 115.5, 78.9, 29.7. IR (neat,  $\text{cm}^{-1}$ ): 2927.1, 1644.9, 1616.5, 1508.4, 1465.6, 1368.7, 1267.8. HRMS (ESI):  $m/z$  calcd for  $\text{C}_{20}\text{H}_{15}\text{ClO}$   $[\text{M}+\text{H}]^+$  307.0884, found 307.0894.

#### 2-methyl-2-(4-(trifluoromethyl)phenyl)-2H-benzo[h]chromene 5m

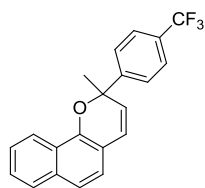

22.4mg, yellow solid, yield 33%, mp: 106-108 °C.  $^1\text{H}$  NMR (400 MHz,  $\text{CDCl}_3$ ;  $\delta$ , ppm): 8.32 (d,  $J = 8.0\text{Hz}$ , 1H), 7.74 (d,  $J = 8.0\text{Hz}$ , 1H), 7.65 (d,  $J = 8.4\text{Hz}$ , 2H), 7.54-7.50 (m, 2H), 7.48-7.43 (m, 2H), 7.34 (d,  $J = 8.0\text{Hz}$ , 1H), 7.12 (d,  $J = 8.4\text{Hz}$ , 1H), 6.60 (d,  $J = 10.0\text{Hz}$ , 1H), 5.98 (d,  $J = 9.6\text{Hz}$ , 1H), 1.87 (s, 3H).  $^{13}\text{C}$  NMR (100 MHz,  $\text{CDCl}_3$ ;  $\delta$ , ppm): 150.1, 147.9, 134.6, 129.5 (q,  $J = 32.3\text{Hz}$ ), 127.8, 127.2, 126.4, 125.7, 125.26 (q,  $J = 3.7\text{Hz}$ ), 125.2, 124.6, 124.5, 124.1, 124.09 (q,  $J = 271.0\text{Hz}$ ), 121.7, 120.7, 79.0, 29.8. IR (neat,  $\text{cm}^{-1}$ ): 2928.6, 1645.6, 1618.2, 1509.3, 1465.5, 1387.9, 1269.1, 1078.6. HRMS (ESI):  $m/z$  calcd for  $\text{C}_{21}\text{H}_{15}\text{F}_3\text{O}$   $[\text{M}+\text{H}]^+$  341.1148, found 341.1159.

#### 2-(3-methoxyphenyl)-2-methyl-2H-benzo[h]chromene 5n

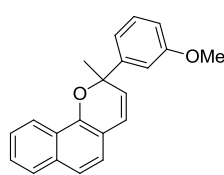

31.4mg, yellow oil, yield 52%.  $^1\text{H}$  NMR (400 MHz,  $\text{CDCl}_3$ ;  $\delta$ , ppm): 8.34 (d,  $J = 8.0\text{Hz}$ , 1H), 7.71 (d,  $J = 7.6\text{Hz}$ , 1H), 7.49-7.40 (m, 2H), 7.31 (d,  $J = 8.4\text{Hz}$ , 1H), 7.20 (t,  $J = 8.0\text{Hz}$ , 1H), 7.13-7.09 (m, 3H), 6.74-7.71 (m, 1H), 6.55 (d,  $J = 10.0\text{Hz}$ , 1H), 5.97 (d,  $J = 9.6\text{Hz}$ , 1H), 3.69 (s, 3H), 1.86 (s, 3H).  $^{13}\text{C}$  NMR (100 MHz,  $\text{CDCl}_3$ ;  $\delta$ , ppm): 159.4, 148.1, 147.8, 134.5, 129.2, 128.1, 127.7, 126.2, 125.5, 124.7, 124.5, 123.4, 121.8, 120.3, 117.2, 115.6, 112.3, 111.0, 79.3, 55.1, 29.7. IR (neat,  $\text{cm}^{-1}$ ): 2931.0, 1644.0, 1600.3, 1508.5, 1450.9, 1385.7, 1289.8, 1268.7. HRMS (ESI):  $m/z$  calcd for  $\text{C}_{21}\text{H}_{18}\text{O}_2$   $[\text{M}+\text{H}]^+$  303.1380, found 303.1387.

#### 2-methyl-2-(naphthalen-2-yl)-2H-benzo[h]chromene 5o

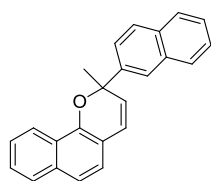

33.5mg, yellow oil, yield 52%.  $^1\text{H}$  NMR (400 MHz,  $\text{CDCl}_3$ ;  $\delta$ , ppm): 8.39 (d,  $J = 8.4\text{Hz}$ , 1H), 7.95 (d,  $J = 1.2\text{Hz}$ , 1H), 7.78-7.70 (m, 5H), 7.51-7.49 (m, 1H), 7.47-7.39 (m, 3H), 7.31 (d,  $J = 8.4\text{Hz}$ , 1H), 7.11 (d,  $J = 8\text{Hz}$ , 1H), 6.61 (d,  $J = 10.0\text{Hz}$ , 1H), 6.06 (d,  $J = 10.0\text{Hz}$ , 1H), 1.95 (s, 3H).  $^{13}\text{C}$  NMR (100 MHz,  $\text{CDCl}_3$ ;  $\delta$ , ppm): 148.2, 143.2, 134.6, 132.9, 132.6, 128.2, 128.1, 128.0, 127.7, 127.5, 126.2, 126.0, 125.9, 125.5, 124.8, 124.5, 123.7, 123.6, 123.4, 121.9, 120.3, 115.6, 79.5, 29.5. IR (neat,  $\text{cm}^{-1}$ ): 2927.4, 1633.0, 1589.8, 1515.1, 1437.6, 1377.1, 1244.7. HRMS (ESI):  $m/z$  calcd for  $\text{C}_{24}\text{H}_{18}\text{O}$   $[\text{M}+\text{H}]^+$  323.1430, found 323.1442.

#### 2-(benzo[d][1,3]dioxol-5-yl)-2-methyl-2H-benzo[h]chromene 5p

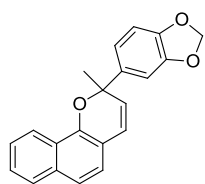

28.4mg, yellow oil, yield 45%.  $^1\text{H}$  NMR (400 MHz,  $\text{CDCl}_3$ ;  $\delta$ , ppm): 8.28 (d,  $J = 8.4\text{Hz}$ , 1H), 8.71 (d,  $J = 7.6\text{Hz}$ , 1H), 7.48-7.39 (m, 2H), 7.31 (d,  $J = 8.0\text{Hz}$ , 1H), 7.13-7.08 (m, 2H), 7.01-6.99 (m, 1H), 6.70 (d,  $J = 8.0\text{Hz}$ , 1H), 6.57 (d,  $J = 9.6\text{Hz}$ , 1H), 5.92 (d,  $J = 9.6\text{Hz}$ , 1H), 5.88-5.86 (m, 2H), 1.84 (s, 3H).  $^{13}\text{C}$  NMR (100 MHz,  $\text{CDCl}_3$ ;  $\delta$ , ppm): 148.1, 147.5,



146.7, 140.1, 134.5, 128.0, 127.6, 126.2, 125.5, 124.7, 124.5, 123.4, 121.9, 120.2, 118.3, 115.5, 107.7, 106.1, 101.0, 79.2, 29.8. IR (neat,  $\text{cm}^{-1}$ ): 2925.9, 1644.2, 1614.6, 1504.0, 1433.3, 1385.2, 1245.5, 1039.4. HRMS (ESI):  $m/z$  calcd for  $\text{C}_{21}\text{H}_{16}\text{O}_3$   $[\text{M}+\text{H}]^+$  317.1172, found 317.1183.

### 2-methyl-2-(thiophen-2-yl)-2H-benzo[h]chromene **5q**

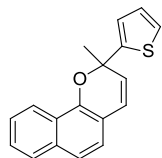

21.1mg, yellow oil, yield 38%.  $^1\text{H}$  NMR (400 MHz,  $\text{CDCl}_3$ ;  $\delta$ , ppm): 8.25-8.22 (m, 1H), 7.71-7.69 (m, 1H), 7.45-7.39 (m, 2H), 7.33 (d,  $J = 8.4\text{Hz}$ , 1H), 7.18 (d,  $J = 1.2\text{Hz}$ , 1H), 7.17-7.13 (m, 1H), 7.06-7.05 (m, 1H), 6.89-6.86 (m, 1H), 6.61 (d,  $J = 9.6\text{Hz}$ , 1H), 5.92 (d,  $J = 9.6\text{Hz}$ , 1H), 1.99 (s, 3H).  $^{13}\text{C}$  NMR (100 MHz,  $\text{CDCl}_3$ ;  $\delta$ , ppm): 149.8, 147.9, 134.6, 127.5, 127.3, 126.5, 126.3, 125.4, 125.1, 124.8, 124.4, 123.9, 123.8, 122.1, 120.4, 115.2, 77.5, 30.0. IR (neat,  $\text{cm}^{-1}$ ): 2926.2, 1646.3, 1433.3, 1384.5, 1226.8. HRMS (ESI):  $m/z$  calcd for  $\text{C}_{18}\text{H}_{14}\text{OS}$   $[\text{M}+\text{H}]^+$  279.0838, found 279.0848.

### 2-cyclohexyl-2-methyl-2H-benzo[h]chromene **5r**

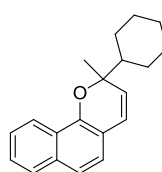

11.0 mg, colorless oil, yield 20%.  $^1\text{H}$  NMR (400 MHz,  $\text{CDCl}_3$ ;  $\delta$ , ppm): 8.18-8.16 (m, 1H), 7.72-7.70 (m, 1H), 7.42-7.39 (m, 2H), 7.29 (d,  $J = 8.4\text{Hz}$ , 1H), 7.11 (d,  $J = 8.4\text{Hz}$ , 1H), 6.44 (d,  $J = 10.0\text{Hz}$ , 1H), 5.61 (d,  $J = 10.0\text{Hz}$ , 1H), 1.94 (m, 2H), 1.80-1.65 (m, 4H), 1.42 (s, 3H), 1.25-1.17 (m, 5H).  $^{13}\text{C}$  NMR (100 MHz,  $\text{CDCl}_3$ ;  $\delta$ , ppm): 148.5, 134.4, 127.6, 127.5, 125.9, 125.1, 124.8, 124.6, 122.9, 121.9, 119.3, 115.0, 81.6, 47.5, 27.1, 27.0, 26.5, 23.7. IR (neat,  $\text{cm}^{-1}$ ): 3051.1, 2927.8, 2852.5, 1596.6, 1509.4, 1384.3, 1271.2. HRMS (ESI):  $m/z$  calcd for  $\text{C}_{20}\text{H}_{22}\text{O}$   $[\text{M}+\text{H}]^+$  279.1743, found 279.1745.

### 3-methyl-3-phenyl-3H-benzo[f]chromene **5s**

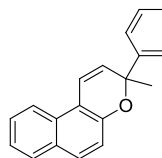

Regioselectivity 2:3, 32.6mg, colorless oil, yield 60%.  $^1\text{H}$  NMR (400 MHz,  $\text{CDCl}_3$ ;  $\delta$ , ppm): 7.90 (d,  $J = 8.4\text{Hz}$ , 1H), 7.79 (d,  $J = 8.4\text{Hz}$ , 2H), 7.63 (d,  $J = 8.8\text{Hz}$ , 1H), 7.46-7.42 (m, 6H), 7.21 (d,  $J = 2.8\text{Hz}$ , 2H), 7.16-7.12 (m, 2H).  $^{13}\text{C}$  NMR (100 MHz,  $\text{CDCl}_3$ ;  $\delta$ , ppm): 157.0, 147.7, 138.6, 129.6, 128.6, 128.3, 128.1, 127.9, 127.2, 126.5, 125.1, 123.5, 121.3, 118.9, 118.3, 113.9, 78.7, 29.2. IR (neat,  $\text{cm}^{-1}$ ): 2928.2, 1631.5, 1599.2, 1494.7, 1445.3, 1375.0, 1242.2. HRMS (ESI):  $m/z$  calcd for  $\text{C}_{20}\text{H}_{16}\text{O}$   $[\text{M}+\text{H}]^+$  273.1274, found 273.1281.

### 3-methyl-3-(p-tolyl)-3H-benzof]chromene **5t**

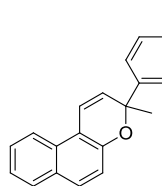

Regioselectivity 10:1, 40.0mg, yellow solid, yield 70%, mp: 70-72  $^{\circ}\text{C}$ .  $^1\text{H}$  NMR (400 MHz,  $\text{CDCl}_3$ ;  $\delta$ , ppm): 7.91 (d,  $J = 8.4\text{Hz}$ , 1H), 7.70 (d,  $J = 8.0\text{Hz}$ , 1H), 7.64 (d,  $J = 9.2\text{Hz}$ , 1H), 7.45-7.43 (m, 3H), 7.31-7.27 (m, 1H), 7.16-7.09 (m, 4H), 6.05-6.02 (m, 1H), 2.28 (s, 3H), 1.82 (s, 3H).  $^{13}\text{C}$  NMR (100 MHz,  $\text{CDCl}_3$ ;  $\delta$ , ppm): 151.0, 142.9, 136.9, 129.8, 129.5, 129.3, 129.2, 128.8, 128.5, 126.6, 126.5, 125.1, 123.4, 121.3, 118.8, 118.3, 113.9, 78.6, 29.2, 21.0. IR (neat,  $\text{cm}^{-1}$ ): 2924.4, 1633.6, 1590.1, 1514.3, 1462.1, 1382.0, 1243.0. HRMS (ESI):  $m/z$  calcd for  $\text{C}_{21}\text{H}_{18}\text{O}$   $[\text{M}+\text{H}]^+$  287.1430, found 287.1436.

### 3-(4-methoxyphenyl)-3-methyl-3H-benzof]chromene **5u**

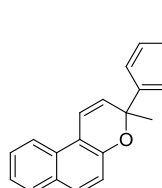

Regioselectivity 14:1, 39.9mg, yellow oil, yield 66%.  $^1\text{H}$  NMR (400 MHz,  $\text{CDCl}_3$ ;  $\delta$ , ppm): 7.91 (d,  $J = 8.4\text{Hz}$ , 1H), 7.69 (d,  $J = 8.4\text{Hz}$ , 1H), 7.62 (d,  $J = 8.8\text{Hz}$ , 1H), 7.46 (d,  $J = 8.8\text{Hz}$ , 2H), 7.31-7.27 (m, 1H), 7.15-7.11 (m, 2H), 6.81 (d,  $J = 8.8\text{Hz}$ , 1H), 6.00 (d,  $J = 10.0\text{Hz}$ , 1H),

3.72 (s, 3H), 1.81 (s, 3H).  $^{13}\text{C}$  NMR (100 MHz,  $\text{CDCl}_3$ ;  $\delta$ , ppm): 158.8, 151.0, 137.8, 129.8, 129.5, 129.2, 128.5, 126.5, 126.4, 123.4, 121.3, 118.8, 118.3, 113.9, 113.5, 78.4, 55.2, 29.0. IR (neat,  $\text{cm}^{-1}$ ): 2930.1, 1633.4, 1609.2, 1510.7, 1440.5, 1382.7, 1246.3, 1032.5. HRMS (ESI):  $m/z$  calcd for  $\text{C}_{21}\text{H}_{18}\text{O}_2$   $[\text{M}+\text{H}]^+$  303.1380, found 303.1388.

### 3-(4-fluorophenyl)-3-methyl-3H-benzo[f]chromene **5v**

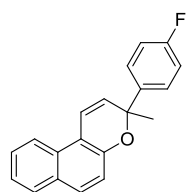

Regioselectivity 5:1, 38.9mg, yellow solid, yield 67%, mp: 80-82 °C.  $^1\text{H}$  NMR (400 MHz,  $\text{CDCl}_3$ ;  $\delta$ , ppm): 7.91 (d,  $J = 8.4\text{Hz}$ , 1H), 7.70 (d,  $J = 8.4\text{Hz}$ , 1H), 7.64 (d,  $J = 8.8\text{Hz}$ , 1H), 7.52-7.49 (m, 2H), 7.46-7.42 (m, 1H), 7.32-7.28 (m, 1H), 7.14 (d,  $J = 10.0\text{Hz}$ , 2H), 6.96 (t,  $J = 8.8\text{Hz}$ , 1H), 6.00 (d,  $J = 10.0\text{Hz}$ , 1H), 1.8 (s, 3H).  $^{13}\text{C}$  NMR (100 MHz,  $\text{CDCl}_3$ ;  $\delta$ , ppm): 161.9 (d,  $J = 245\text{Hz}$ ), 150.8, 141.5 (d,  $J = 4\text{Hz}$ ), 129.8, 129.7, 129.2, 128.5, 128.0, 127.0 (d,  $J = 8\text{Hz}$ ), 126.6, 123.6, 121.3, 119.3, 118.2, 114.9 (d,  $J = 21\text{Hz}$ ), 113.9, 78.2, 29.3. IR (neat,  $\text{cm}^{-1}$ ): 2928.5, 1633.8, 1602.2, 1507.9, 1462.9, 1382.5, 1233.6, 1093.5. HRMS (ESI):  $m/z$  calcd for  $\text{C}_{20}\text{H}_{15}\text{FO}$   $[\text{M}+\text{H}]^+$  291.1180, found 291.1189.

### 3-cyclohexyl-3-methyl-3H-benzo[f]chromene **5w**

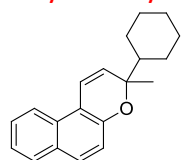

21.0mg, yellow oil, yield 38%.  $^1\text{H}$  NMR (400 MHz,  $\text{CDCl}_3$ ;  $\delta$ , ppm): 7.93 ( $J = 8.4\text{Hz}$ , 1H), 7.72 (d,  $J = 8.0\text{Hz}$ , 1H), 7.62 (d,  $J = 8.8\text{Hz}$ , 1H), 7.47-7.43 (m, 1H), 7.31-7.28 (m, 1H), 7.05-7.02 (m, 2H), 5.70 (d,  $J = 10.4\text{Hz}$ , 1H), 1.92-1.87 (m, 2H), 1.77-1.64 (m, 5H), 1.39 (s, 3H), 1.19-1.15 (m, 4H).  $^{13}\text{C}$  NMR (100 MHz,  $\text{CDCl}_3$ ;  $\delta$ , ppm): 151.3, 129.8, 129.2, 129.0, 128.5, 127.7, 126.4, 123.1, 121.1, 118.3, 113.4, 80.0, 47.1, 27.2, 26.9, 26.5, 26.47, 26.45, 23.3. IR (neat,  $\text{cm}^{-1}$ ): 2928.7, 2854.2, 1590.9, 1515.1, 1449.9, 1382.7, 1096.0. HRMS (ESI):  $m/z$  calcd for  $\text{C}_{20}\text{H}_{20}\text{O}$   $[\text{M}+\text{H}]^+$  279.1743, found 279.1749.

### 3,3-dimethyl-3H-benzo[f]chromene **5x**

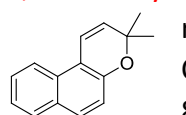

regioselectivity 3:1, 20.0mg, yellow oil, yield 48%.  $^1\text{H}$  NMR (400 MHz,  $\text{CDCl}_3$ ;  $\delta$ , ppm): 7.93 (d,  $J = 8.4\text{Hz}$ , 1H), 7.73 (d,  $J = 8.0\text{Hz}$ , 1H), 7.64 (d,  $J = 8.8\text{Hz}$ , 1H), 7.46 (t,  $J = 7.2\text{Hz}$ , 1H), 7.31 (t,  $J = 6.8\text{Hz}$ , 1H), 7.06-7.00 (m, 2H), 5.71 (d,  $J = 10.4\text{Hz}$ , 1H), 1.48 (s, 3H).  $^{13}\text{C}$  NMR (100 MHz,  $\text{CDCl}_3$ ;  $\delta$ , ppm): 150.9, 129.4, 129.3, 129.0, 128.5, 126.4, 123.3, 121.2, 118.4, 118.3, 113.7, 110.2, 76.0, 27.6. IR (neat,  $\text{cm}^{-1}$ ): 3060.0, 2975.4, 1633.7, 1598.4, 1515.0, 1382.7, 1360.6. HRMS (ESI):  $m/z$  calcd for  $\text{C}_{15}\text{H}_{14}\text{O}$   $[\text{M}+\text{H}]^+$  211.1117, found 211.1122.

### 2-(1-phenylvinyl)-1,2-dihydronaphtho[2,1-b]furan **6a**

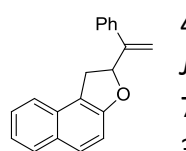

42mg, colorless oil, yield 77%.  $^1\text{H}$  NMR (400 MHz,  $\text{CDCl}_3$ ;  $\delta$ , ppm): 7.80 (d,  $J = 8.2\text{Hz}$ , 1H), 7.71 (d,  $J = 8.7\text{Hz}$ , 1H), 7.49-7.41 (m, 4H), 7.38-7.29 (m, 4H), 7.21 (d,  $J = 8.2\text{Hz}$ , 1H), 5.91 (t,  $J = 9.0\text{Hz}$ , 1H), 5.53 (s, 1H), 5.47 (s, 1H), 3.69 (dd,  $J = 15.4\text{Hz}$ ,  $J = 10.2\text{Hz}$ , 1H), 3.25 (dd,  $J = 15.4\text{Hz}$ ,  $J = 7.9\text{Hz}$ , 1H).  $^{13}\text{C}$  NMR (100 MHz,  $\text{CDCl}_3$ ;  $\delta$ , ppm): 157.0, 147.6, 138.5, 130.1, 129.3, 129.1, 128.7, 128.5, 127.9, 126.7, 126.6, 122.9, 122.6, 117.9, 113.1, 112.0, 84.1, 35.1. IR (neat,  $\text{cm}^{-1}$ ): 2922.6, 1630.8, 1597.3, 1518.3, 1276.2. HRMS (ESI):  $m/z$  calcd for  $\text{C}_{20}\text{H}_{16}\text{O}$   $[\text{M}+\text{H}]^+$  273.1274, found 273.1280.

### 7-methyl-2-(1-phenylvinyl)-1,2-dihydronaphtho[2,1-b]furan **6b**

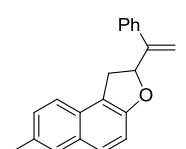

42.9mg, colorless oil, yield 75%.  $^1\text{H}$  NMR (400 MHz,  $\text{CDCl}_3$ ;  $\delta$ , ppm): 7.60 (d,  $J = 8.8\text{Hz}$ , 1H), 7.56 (s, 1H), 7.45-7.43 (m, 2H), 7.38-7.31 (m, 4H), 7.24 (d,  $J = 8.4\text{Hz}$ , 1H), 7.15 (d,  $J = 8.4\text{Hz}$ , 1H), 5.85 (t,  $J = 9.2\text{Hz}$ , 1H),

5.52 (s, 1H), 5.45 (s, 1H), 3.64 (dd,  $J = 15.2\text{Hz}, 10.0\text{Hz}$ , 1H), 3.22 (dd,  $J = 15.2\text{Hz}, 10.0\text{Hz}$ , 1H), 2.44 (s, 3H).  $^{13}\text{C}$  NMR (100 MHz,  $\text{CDCl}_3$ ;  $\delta$ , ppm): 156.4, 147.7, 138.6, 132.2, 129.6, 129.0, 128.9, 128.5, 128.3, 127.9, 127.6, 126.8, 122.5, 117.8, 113.1, 111.9, 84.0, 35.1, 21.5. IR (neat,  $\text{cm}^{-1}$ ): 2935.1, 1636.2, 1601.0, 1495.6, 1253.2, 1020.3. HRMS (ESI):  $m/z$  calcd for  $\text{C}_{21}\text{H}_{18}\text{O}$   $[\text{M}+\text{H}]^+$  287.1430, found 287.1438.

**8-methoxy-2-(1-phenylvinyl)-1,2-dihydronaphtho[2,1-*b*]furan 6c**

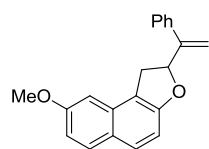

48.3mg, yellow solid, yield 80%, mp: 105-107 °C.  $^1\text{H}$  NMR (400 MHz,  $\text{CDCl}_3$ ;  $\delta$ , ppm): 7.66 (d,  $J = 8.8\text{Hz}$ , 1H), 7.60 (d,  $J = 8.8\text{Hz}$ , 1H), 7.46-7.44 (m, 2H), 7.34-7.30 (m, 3H), 7.04 (d,  $J = 8.8\text{Hz}$ , 1H), 6.93 (dd,  $J = 8.8\text{Hz}, J = 1.6\text{Hz}$ , 1H), 6.69 (d,  $J = 2.4\text{Hz}$ , 1H), 5.88 (t,  $J = 8.8\text{Hz}$ , 1H).

5.53(s, 1H), 5.46 (s, 1H), 3.82 (s, 3H), 3.61 (dd,  $J = 15.2\text{Hz}, J = 10.0\text{Hz}$ , 1H), 3.18 (dd,  $J = 15.2\text{Hz}, J = 10.0\text{Hz}$ , 1H).  $^{13}\text{C}$  NMR (100 MHz,  $\text{CDCl}_3$ ;  $\delta$ , ppm): 158.5, 157.6, 147.7, 138.6, 132.0, 130.2, 128.8, 128.6, 127.9, 126.8, 124.7, 117.0, 115.6, 112.9, 109.4, 101.2, 83.9, 55.2, 35.2. IR (neat,  $\text{cm}^{-1}$ ): 2932.1, 1632.2, 1601.0, 1495.6, 1252.1, 1028.8. HRMS (ESI):  $m/z$  calcd for  $\text{C}_{21}\text{H}_{18}\text{O}_2$   $[\text{M}+\text{H}]^+$  303.1380, found 303.1387.

**8-(1-phenylvinyl)-8,9-dihydrofuro[2,3-*h*]quinoline 6e**

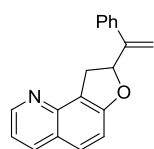

31.1mg, yellow solid, yield 57%, mp: 88-90 °C.  $^1\text{H}$  NMR (400 MHz,  $\text{CDCl}_3$ ;  $\delta$ , ppm): 8.83 (dd,  $J = 4.4\text{Hz}, J = 1.7\text{Hz}$ , 1H), 8.12 (dd,  $J = 8.2\text{Hz}, J = 1.7\text{Hz}$ , 1H), 7.71 (d,  $J = 8.8\text{Hz}$ , 1H), 7.48-7.46 (m, 2H), 7.39-7.32 (m, 3H), 7.30 (d,  $J = 8.8\text{Hz}$ , 1H), 7.24 (dd,  $J = 8.2\text{Hz}, J = 4.3\text{Hz}$ , 1H), 5.99 (t,  $J = 9.0\text{Hz}$ , 1H),

5.56 (s, 1H), 5.50 (s, 1H), 3.93 (dd,  $J = 16\text{Hz}, J = 10.2\text{Hz}$ , 1H), 3.51 (dd,  $J = 16.0\text{Hz}, J = 7.9\text{Hz}$ , 1H).  $^{13}\text{C}$  NMR (100 MHz,  $\text{CDCl}_3$ ;  $\delta$ , ppm): 160.2, 150.7, 147.5, 145.7, 138.1, 136.6, 128.9, 128.5, 127.9, 126.8, 124.0, 119.8, 118.3, 112.9, 112.8, 84.8, 34.6. IR (neat,  $\text{cm}^{-1}$ ): 2935.0, 1615.6, 1593.0, 1486.2, 1430.0, 1384.0, 1264.0. HRMS (ESI):  $m/z$  calcd for  $\text{C}_{19}\text{H}_{15}\text{NO}$   $[\text{M}+\text{H}]^+$  274.1226, found 274.1230.

**2,9-bis(1-phenylvinyl)-2,3,8,9-tetrahydronaphtho[2,1-*b*:3,4-*b'*]difuran 6f**

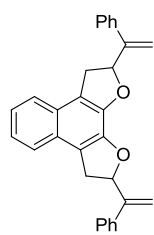

51.6mg, white solid, yield 57%, mp: 72-74 °C.  $^1\text{H}$  NMR (400 MHz,  $\text{CDCl}_3$ ;  $\delta$ , ppm): 7.47-7.44 (m, 6H), 7.37-7.31 (m, 6H), 7.26-7.24 (m, 2H), 6.01-5.95 (m, 2H), 5.60 (d,  $J = 8\text{Hz}$ , 2H), 5.48 (s, 2H), 3.73-3.66 (m, 2H), 3.29-3.22 (m, 2H).  $^{13}\text{C}$  NMR (100 MHz,  $\text{CDCl}_3$ ;  $\delta$ , ppm): 147.1, 143.7, 138.4, 128.5, 127.9, 126.8, 126.4, 123.7, 123.4, 120.1, 113.5, 113.4, 85.4, 35.5. IR (neat,  $\text{cm}^{-1}$ ): 2925.5, 1632.6, 1599.0, 1495.3, 1440.6, 1287.5, 1028.8.

HRMS (ESI):  $m/z$  calcd for  $\text{C}_{30}\text{H}_{24}\text{O}_2$   $[\text{M}+\text{H}]^+$  417.1849, found 417.1864.

**2-(1-(*p*-tolyl)vinyl)-1,2-dihydronaphtho[2,1-*b*]furan 6g**

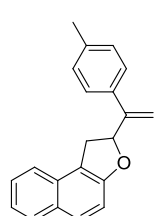

50.3mg, white solid, yield 88%, mp: 120-122 °C.  $^1\text{H}$  NMR (400 MHz,  $\text{CDCl}_3$ ;  $\delta$ , ppm): 7.77 (d,  $J = 8.4\text{Hz}$ , 1H), 7.68 (d,  $J = 8.8\text{Hz}$ , 1H), 7.45 (d,  $J = 8.4\text{Hz}$ , 1H), 7.40 (d,  $J = 1.2\text{Hz}$ , 1H), 7.38-7.37 (m, 2H), 7.34 (t,  $J = 8\text{Hz}$ , 1H), 7.28-7.26 (m, 1H), 7.24-7.13 (m, 1H), 5.86 (t,  $J = 9.2\text{Hz}$ , 1H), 5.48(s, 1H), 5.42

(s, 1H), 3.65 (dd,  $J = 15.6\text{Hz}, J = 10.0\text{Hz}$ , 1H), 3.23 (dd,  $J = 15.2\text{Hz}, J = 8.0\text{Hz}$ , 1H), 2.34 (s, 3H).  $^{13}\text{C}$  NMR (100 MHz,  $\text{CDCl}_3$ ;  $\delta$ , ppm): 157.0, 147.4, 137.7, 135.6, 130.8, 129.3, 129.2, 129.1, 128.7, 126.6, 122.8, 122.6, 118.0, 112.3, 112.0, 84.1, 35.1, 21.1. IR (neat,  $\text{cm}^{-1}$ ): 2920.4, 1631.0, 1600.8, 1520.0, 1464.8, 1377.4, 1257.3. HRMS (ESI):  $m/z$  calcd for  $\text{C}_{21}\text{H}_{18}\text{O}$   $[\text{M}+\text{H}]^+$  287.1430, found 287.1440.

**2-(1-(4-methoxyphenyl)vinyl)-1,2-dihydronaphtho[2,1-*b*]furan 6h**

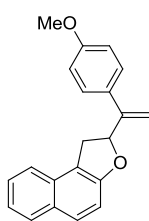

48.9mg, white solid, yield 81%, mp: 111-113 °C. <sup>1</sup>H NMR (400 MHz, CDCl<sub>3</sub>; δ, ppm): 7.79 (d, *J* = 8.0Hz, 1H), 7.69 (d, *J* = 8.8Hz, 1H), 7.47 (d, *J* = 8.0Hz, 1H), 7.42-7.37 (m, 3H), 7.29-7.25 (m, 1H), 7.19 (d, *J* = 8.8Hz, 1H), 6.87 (d, *J* = 8.8Hz, 1H), 5.85 (t, *J* = 9.2Hz, 1H), 5.44(s, 1H), 5.39 (s, 1H), 3.79 (s, 3H), 3.67 (dd, *J* = 15.2Hz, *J* = 10.0Hz, 1H), 3.25 (dd, *J* = 15.2Hz, *J* = 8.0Hz, 1H). <sup>13</sup>C NMR (100 MHz, CDCl<sub>3</sub>; δ, ppm): 159.4, 157.0, 147.0, 130.9, 130.8, 129.3, 129.1, 128.7, 127.9, 126.6, 122.9, 122.7, 118.0, 113.9, 112.0, 111.8, 84.3, 55.2, 35.1. IR (neat, cm<sup>-1</sup>): 2932.6, 1630.9, 1606.8, 1511.2, 1442.7, 1373.2, 1245.4, 1032.8. HRMS (ESI): *m/z* calcd for C<sub>21</sub>H<sub>18</sub>O<sub>2</sub> [M+H]<sup>+</sup> 303.1380, found 303.1389.

**2-(1-(4-(*tert*-butyl)phenyl)vinyl)-1,2-dihydronaphtho[2,1-*b*]furan 6i**

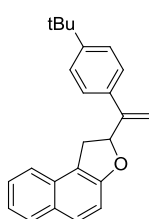

49.2mg, white solid, yield 75%, mp: 117-119 °C. <sup>1</sup>H NMR (400 MHz, CDCl<sub>3</sub>; δ, ppm): 7.78 (d, *J* = 8.4Hz, 1H), 6.69 (d, *J* = 8.8Hz, 1H), 7.46 (d, *J* = 8.0Hz, 1H), 7.40-7.35 (m, 5H), 7.28-7.25 (m, 1H), 7.20 (d, *J* = 9.2Hz, 1H), 5.88 (t, *J* = 9.2Hz, 1H), 5.48(s, 1H), 5.46 (s, 1H), 6.68 (dd, *J* = 15.6Hz, *J* = 10.0Hz, 1H), 3.26 (dd, *J* = 15.2Hz, *J* = 8.0Hz, 1H), 1.32 (s, 9H). <sup>13</sup>C NMR (100 MHz, CDCl<sub>3</sub>; δ, ppm): 157.0, 150.9, 147.2, 135.4, 130.8, 129.3, 129.1, 128.7, 126.6, 126.3, 125.5, 122.8, 122.7, 118.0, 112.2, 112.0, 84.1, 35.2, 34.5, 31.3. IR (neat, cm<sup>-1</sup>): 2961.8, 1631.1, 1601.5, 1520.3, 1464.7, 1365.1, 1248.8, 1133.2. HRMS (ESI): *m/z* calcd for C<sub>24</sub>H<sub>24</sub>O [M+H]<sup>+</sup> 329.1900, found 329.1910.

**2-(1-(4-chlorophenyl)vinyl)-1,2-dihydronaphtho[2,1-*b*]furan 6j**

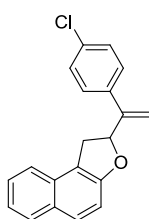

18.4mg, yellow solid, yield 30%, mp: 108-110 °C. <sup>1</sup>H NMR (400 MHz, CDCl<sub>3</sub>; δ, ppm): 7.80 (d, *J* = 8.0Hz, 1H), 7.71 (d, *J* = 8.8Hz, 1H), 7.49 (d, *J* = 8.4Hz, 2H), 7.44 (d, *J* = 1.2Hz, 1H), 7.38 (d, *J* = 8.8Hz, 2H), 7.32-7.30 (m, 3H), 7.19 (d, *J* = 8.8Hz, 1H), 5.84 (t, *J* = 9.2Hz, 1H), 5.55(s, 1H), 5.46 (s, 1H), 6.68 (dd, *J* = 15.6Hz, *J* = 10.0Hz, 1H), 3.24 (dd, *J* = 15.2Hz, *J* = 8.0Hz, 1H). <sup>13</sup>C NMR (100 MHz, CDCl<sub>3</sub>; δ, ppm): 156.9, 146.6, 137.0, 133.9, 130.8, 129.4, 129.2, 128.7, 128.2, 126.7, 123.0, 122.6, 117.8, 114.1, 112.0, 84.1, 34.9. IR (neat, cm<sup>-1</sup>): 2924.6, 1630.7, 1600.0, 1492.1, 1444.2, 1242.7. HRMS (ESI): *m/z* calcd for C<sub>20</sub>H<sub>15</sub>ClO [M+H]<sup>+</sup> 307.0884, found 307.0895.

**2-(1-(4-fluorophenyl)vinyl)-1,2-dihydronaphtho[2,1-*b*]furan 6k**

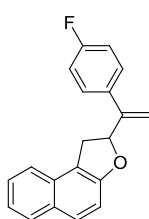

45.2mg, yellow solid, yield 78%, mp: 106-108 °C. <sup>1</sup>H NMR (400 MHz, CDCl<sub>3</sub>; δ, ppm): 7.79 (d, *J* = 8.0Hz, 1H), 7.70 (d, *J* = 8.8Hz, 1H), 7.47 (d, *J* = 8.4Hz, 1H), 7.42-7.39 (m, 3H), 7.30-7.26 (m, 1H), 7.21-7.17 (m, 1H), 7.04-7.00 (m, 2H), 5.82 (t, *J* = 9.2Hz, 1H), 5.51 (s, 1H), 5.41 (s, 2H), 3.65 (dd, *J* = 15.6Hz, *J* = 10.4Hz, 1H), 3.23 (dd, *J* = 15.6Hz, *J* = 8.4Hz, 1H). <sup>13</sup>C NMR (100 MHz, CDCl<sub>3</sub>; δ, ppm): 162.5 (d, *J* = 246Hz), 156.9, 146.6, 134.5 (d, *J* = 4Hz), 130.8, 129.3, 129.2, 128.7, 128.5 (d, *J* = 8Hz), 126.7, 122.9, 122.6, 117.9, 115.4 (d, *J* = 21Hz). IR (neat, cm<sup>-1</sup>): 2924.8, 1631.0, 1602.0, 1509.4, 1444.1, 1236.6. HRMS (ESI): *m/z* calcd for C<sub>20</sub>H<sub>15</sub>FO [M+H]<sup>+</sup> 291.1180, found 291.1189.

**2-(1-(4-(trifluoromethyl)phenyl)vinyl)-1,2-dihydronaphtho[2,1-*b*]furan 6l**

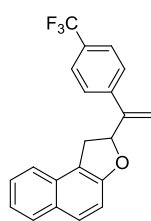

42.8mg, yellow solid, yield 63%, mp: 128-130 °C. <sup>1</sup>H NMR (400 MHz, CDCl<sub>3</sub>; δ, ppm): 7.80 (d, *J* = 8.4Hz, 1H), 7.71 (d, *J* = 8.8Hz, 1H), 7.61-7.54 (m, 4H), 7.49-7.42 (m, 2H), 7.31-7.28 (m, 1H), 7.19 (d, *J* = 8.8Hz, 1H), 5.87 (t, *J* = 9.6Hz, 1H), 5.63(s, 1H), 5.53 (s, 1H), 3.68 (dd, *J* = 15.6Hz, 10.0Hz, 1H), 3.23 (dd, *J* = 15.2Hz, *J* = 8.0Hz, 1H). <sup>13</sup>C NMR (100 MHz, CDCl<sub>3</sub>; δ, ppm): 156.8, 146.6, 142.1, 130.7, 130.0 (q, *J* = 32Hz), 129.4, 129.3, 128.7, 127.2, 126.9, 125.5 (q, *J* = 4Hz), 124.1 (q, *J* = 271Hz), 123.0, 122.6, 117.7, 115.5, 112.0, 83.9, 34.9. IR (neat, cm<sup>-1</sup>): 2925.2, 1631.2, 1600.5, 1521.0, 1444.4, 1243.5, 1067.4. HRMS (ESI): *m/z* calcd for C<sub>21</sub>H<sub>15</sub>F<sub>3</sub>O [M+H]<sup>+</sup> 341.1148, found 341.1158.

#### 2-(1-(3-methoxyphenyl)vinyl)-1,2-dihydronaphtho[2,1-b]furan **6m**

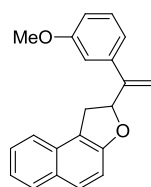

41.1mg, yellow oil, yield 68%. <sup>1</sup>H NMR (400 MHz, CDCl<sub>3</sub>; δ, ppm): 7.79 (d, *J* = 8.0Hz, 1H), 7.70 (d, *J* = 8.8Hz, 1H), 7.48 (d, *J* = 8.4Hz, 1H), 7.43-7.39 (m, 1H), 7.25-7.29 (m, 2H), 7.20 (d, *J* = 8.8Hz, 1H), 7.04 (d, *J* = 8.0Hz, 1H), 7.00-6.99 (m, 1H), 6.87-6.85 (m, 1H), 5.88 (t, *J* = 9.2Hz, 1H), 5.53(s, 1H), 5.47 (s, 1H), 3.76 (s, 3H), 3.69 (dd, *J* = 15.2Hz, *J* = 10.0Hz, 1H), 3.25 (dd, *J* = 15.2Hz, *J* = 8.0Hz, 1H). <sup>13</sup>C NMR (100 MHz, CDCl<sub>3</sub>; δ, ppm): 159.6, 157.0, 147.5, 140.0, 130.8, 129.5, 129.3, 129.1, 128.7, 126.6, 122.9, 122.7, 119.2, 118.0, 113.4, 113.3, 112.6, 112.0, 84.1, 55.2, 35.0. IR (neat, cm<sup>-1</sup>): 2936.2, 1631.0, 1599.0, 1487.8, 1429.9, 1376.3, 1288.5, 1048.3. HRMS (ESI): *m/z* calcd for C<sub>21</sub>H<sub>18</sub>O<sub>2</sub> [M+H]<sup>+</sup> 303.1380, found 303.1388.

#### 2-(1-(naphthalen-2-yl)vinyl)-1,2-dihydronaphtho[2,1-b]furan **6n**

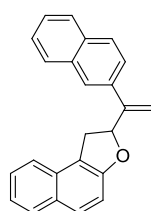

51.5mg, white solid, yield 80% mp: 145-147 °C. <sup>1</sup>H NMR (400 MHz, CDCl<sub>3</sub>; δ, ppm): 7.87 (s, 1H), 7.82-7.79 (m, 4H), 7.71 (d, *J* = 8.8Hz, 1H), 7.61-7.60 (m, 1H), 7.48-7.39 (m, 3H), 7.30-7.28 (m, 1H), 7.24-7.21 (m, 2H), 6.03 (t, *J* = 8.8Hz, 1H), 5.63(s, 1H), 5.60 (s, 1H), 3.73 (dd, *J* = 15.2Hz, 10.0Hz, 1H), 3.29 (dd, *J* = 15.2Hz, 8.0Hz, 1H). <sup>13</sup>C NMR (100 MHz, CDCl<sub>3</sub>; δ, ppm): 157.0, 147.5, 135.8, 133.3, 132.9, 130.8, 129.3, 129.1, 128.7, 128.2, 127.6, 126.6, 126.3, 126.2, 125.5, 125.0, 122.9, 122.7, 117.9, 113.4, 112.0, 83.9, 35.2. IR (neat, cm<sup>-1</sup>): 2929.7, 1629.4, 1598.7, 1520.0, 1442.4, 1257.4. HRMS (ESI): *m/z* calcd for C<sub>24</sub>H<sub>18</sub>O [M+H]<sup>+</sup> 323.1430, found 323.1441.

#### 2-(1-(benzo[d][1,3]dioxol-5-yl)vinyl)-1,2-dihydronaphtho[2,1-b]furan **6o**

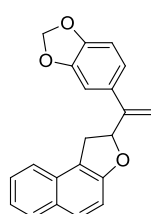

34.8mg, yellow oil, yield 55%. <sup>1</sup>H NMR (400 MHz, CDCl<sub>3</sub>; δ, ppm): 7.79 (d, *J* = 8.0Hz, 1H), 7.70 (d, *J* = 8.8Hz, 1H), 7.48 (d, *J* = 8.0Hz, 1H), 7.43-7.39 (m, 1H), 7.30-7.26 (m, 1H), 7.19 (d, *J* = 8.8Hz, 1H), 6.96 (d, *J* = 2.0Hz, 1H), 6.93-6.91 (m, 1H), 6.78 (d, *J* = 8.0Hz, 1H), 5.94 (d, *J* = 1.6Hz, 2H), 5.81 (t, *J* = 8.8Hz, 1H), 5.45(s, 1H), 5.37 (s, 1H), 3.66 (dd, *J* = 15.2Hz, *J* = 10.0Hz, 1H), 3.25 (dd, *J* = 15.2Hz, *J* = 10.0Hz, 1H). <sup>13</sup>C NMR (100 MHz, CDCl<sub>3</sub>; δ, ppm): 156.9, 147.8, 147.4, 147.1, 132.6, 130.8, 129.3, 129.1, 128.7, 126.6, 122.9, 122.6, 120.3, 117.9, 112.5, 112.0, 108.3, 107.4, 101.1, 84.2, 35.0. IR (neat, cm<sup>-1</sup>): 2900.3, 1631.0, 1602.2, 1503.3, 1443.0, 1241.1, 1039.3. HRMS (ESI): *m/z* calcd for C<sub>21</sub>H<sub>16</sub>O<sub>3</sub> [M+H]<sup>+</sup> 317.1172, found 317.1182.

#### 2-(1-(thiophen-2-yl)vinyl)-1,2-dihydronaphtho[2,1-b]furan **6p**

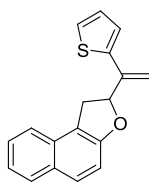

41.7mg, yellow oil, yield 75%.  $^1\text{H}$  NMR (400 MHz,  $\text{CDCl}_3$ ;  $\delta$ , ppm): 7.80 (d,  $J = 8.4\text{Hz}$ , 1H), 7.70 (d,  $J = 8.8\text{Hz}$ , 1H), 7.51 (d,  $J = 8.0\text{Hz}$ , 1H), 7.44-7.41 (m, 1H), 7.31-7.27 (m, 1H), 7.22-7.19 (m, 2H), 7.08-7.06 (m, 1H), 6.99-6.97 (m, 1H), 5.79 (t,  $J = 9.2\text{Hz}$ , 1H), 5.55 (s, 1H), 5.41 (s, 1H), 3.78 (dd,  $J = 15.6\text{Hz}$ ,  $J = 10.0\text{Hz}$ , 1H), 3.39 (dd,  $J = 15.6\text{Hz}$ ,  $J = 8.0\text{Hz}$ , 1H).  $^{13}\text{C}$  NMR (100 MHz,  $\text{CDCl}_3$ ;  $\delta$ , ppm): 156.9, 141.2, 141.0, 130.7, 129.3, 129.2, 128.7, 127.5, 126.7, 124.9, 124.2, 123.0, 122.7, 118.0, 112.0, 111.8, 84.0, 35.4. IR (neat,  $\text{cm}^{-1}$ ): 2917.8, 1629.8, 1599.0, 1521.0, 1465.1, 1242.4. HRMS (ESI):  $m/z$  calcd for  $\text{C}_{18}\text{H}_{14}\text{OS}$   $[\text{M}+\text{H}]^+$  279.0838, found 279.0848.

**2-(1-cyclohexylvinyl)-1,2-dihydronaphtho[2,1-b]furan 6q**

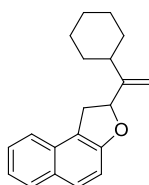

17.0mg, colorless oil, yield 31%.  $^1\text{H}$  NMR (400 MHz,  $\text{CDCl}_3$ ;  $\delta$ , ppm): 7.80 (d,  $J = 8.4\text{Hz}$ , 1H), 7.69 (d,  $J = 8.8\text{Hz}$ , 1H), 7.57 (d,  $J = 8.4\text{Hz}$ , 1H), 7.46 (t,  $J = 6.8\text{Hz}$ , 1H), 7.30 (t,  $J = 8.0\text{Hz}$ , 1H), 7.14 (d,  $J = 8.8\text{Hz}$ , 1H), 5.41 (t,  $J = 8.8\text{Hz}$ , 1H), 5.20 (s, 1H), 4.98 (s, 1H), 3.66 (dd,  $J = 15.2\text{Hz}$ ,  $J = 10.0\text{Hz}$ , 1H), 3.27 (dd,  $J = 15.2\text{Hz}$ ,  $J = 10.0\text{Hz}$ , 1H), 2.05-2.01 (m, 1H), 1.89-1.68 (m, 5H), 1.32-1.24 (m, 5H).  $^{13}\text{C}$  NMR (100 MHz,  $\text{CDCl}_3$ ;  $\delta$ , ppm): 157.3, 154.3, 130.8, 129.2, 128.9, 128.7, 126.6, 122.7, 122.6, 118.1, 112.0, 108.6, 85.3, 40.5, 35.0, 33.5, 33.2, 26.8, 26.2. IR (neat,  $\text{cm}^{-1}$ ): 3058.7, 2924.9, 2851.7, 1631.3, 1600.9, 1499.7, 1240.8. HRMS (ESI):  $m/z$  calcd for  $\text{C}_{20}\text{H}_{22}\text{O}$   $[\text{M}+\text{H}]^+$  279.1743, found 279.1747.

## 8. The Spectra of Products

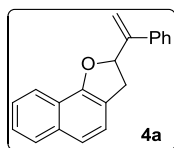

regioselectivity 25:1

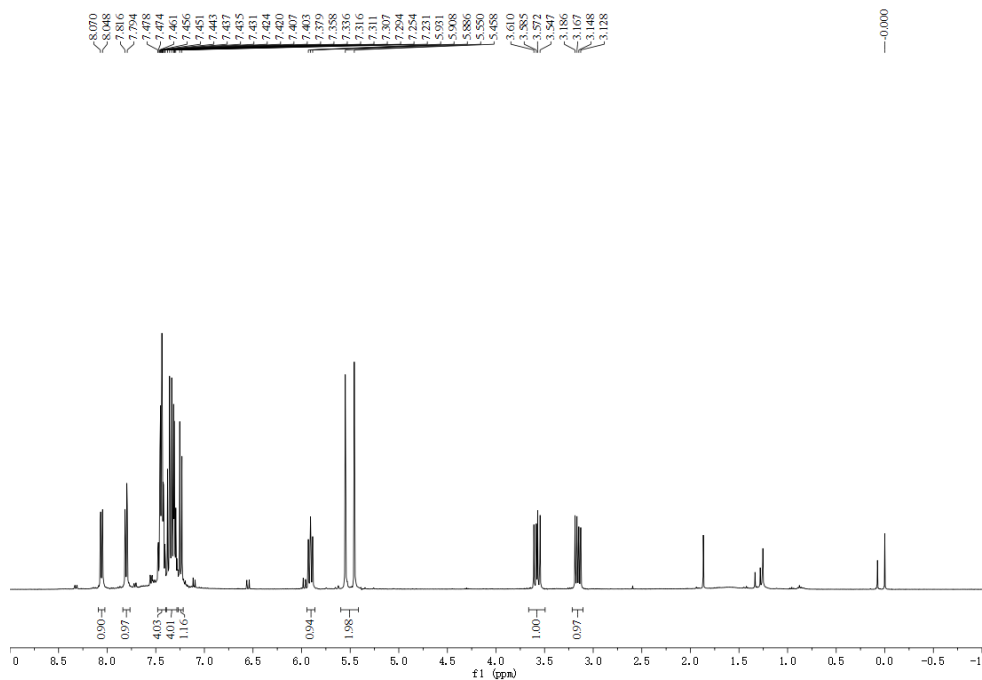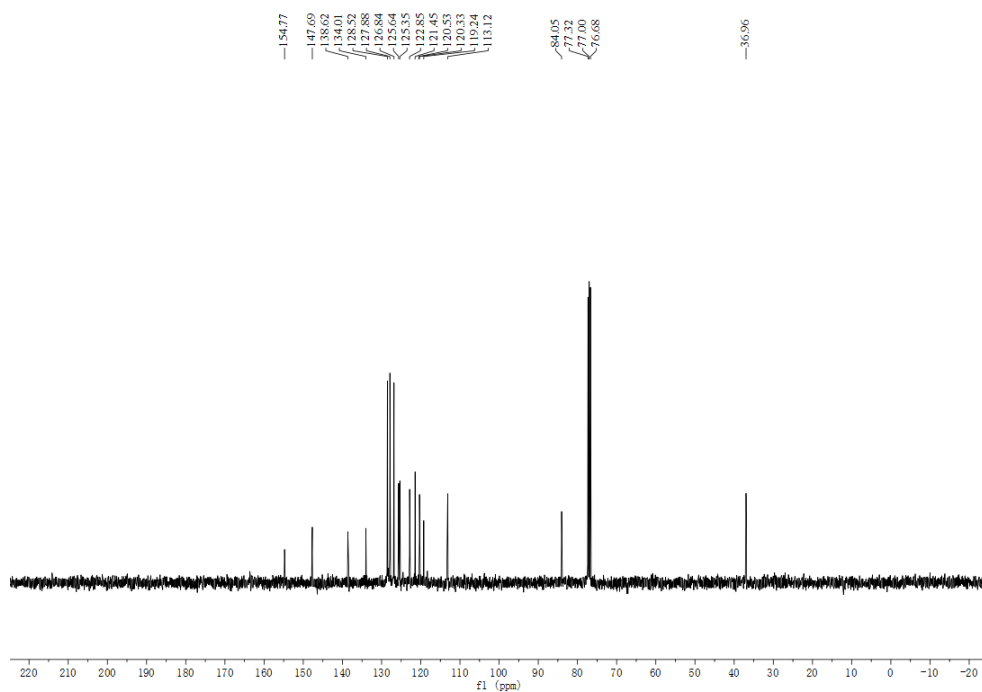

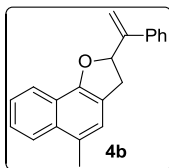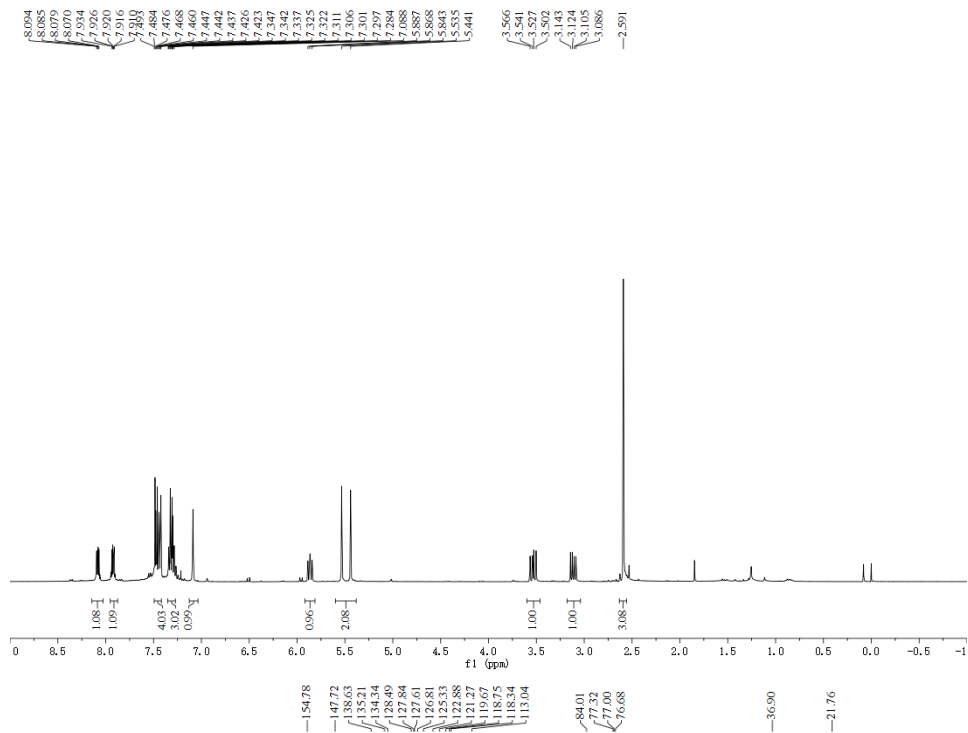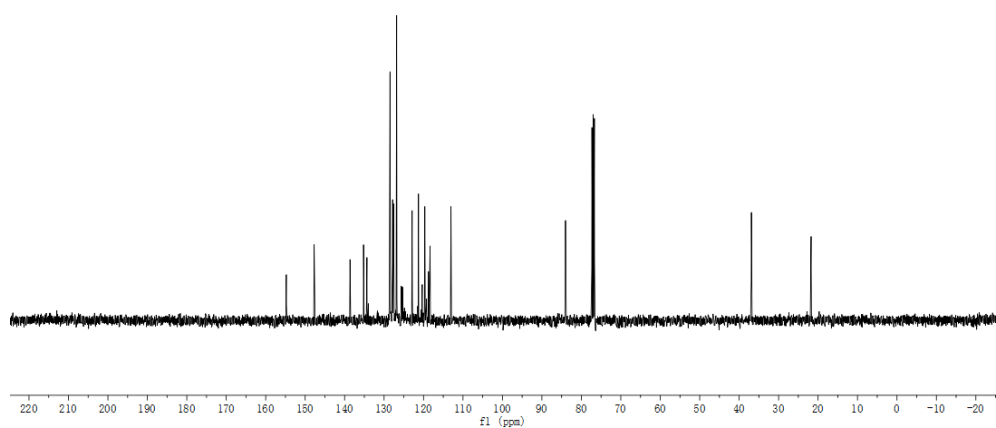



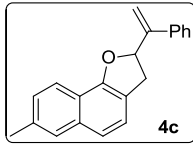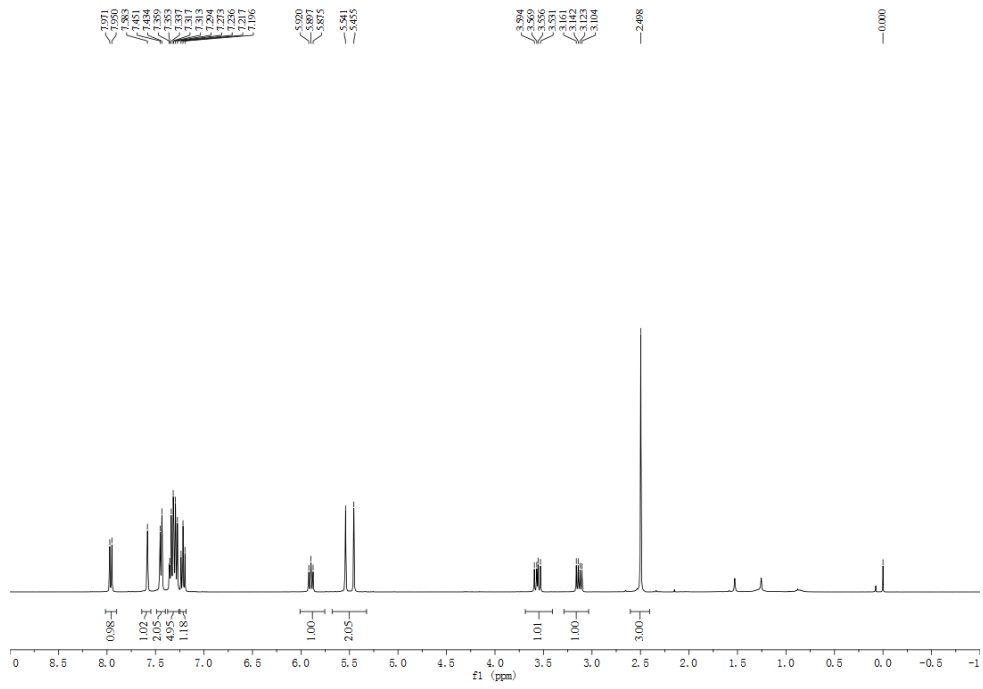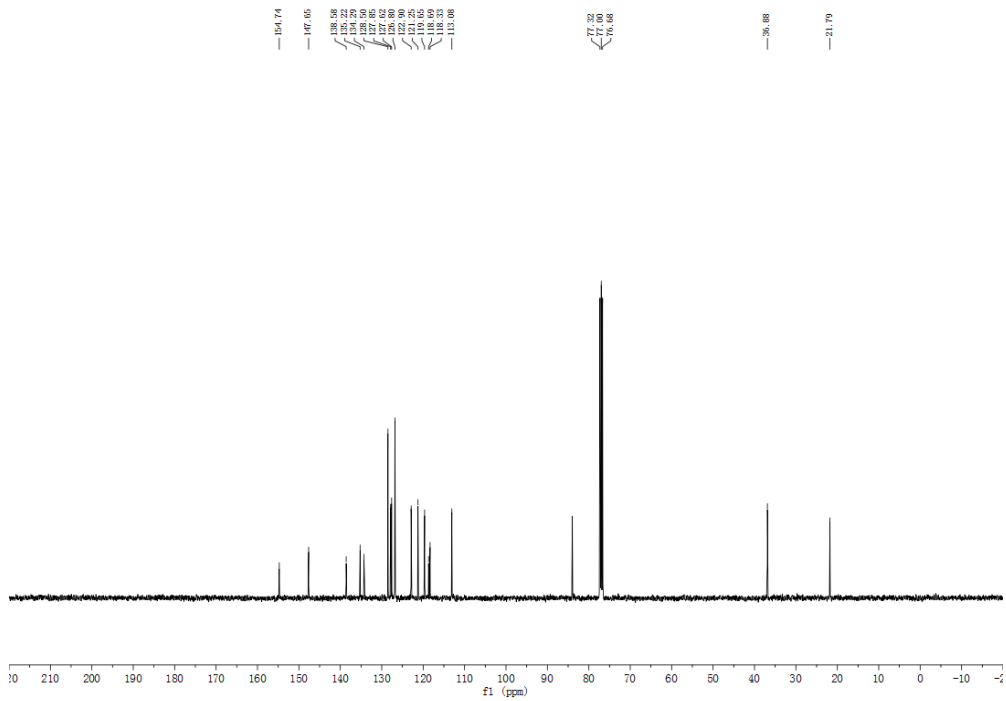

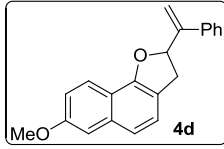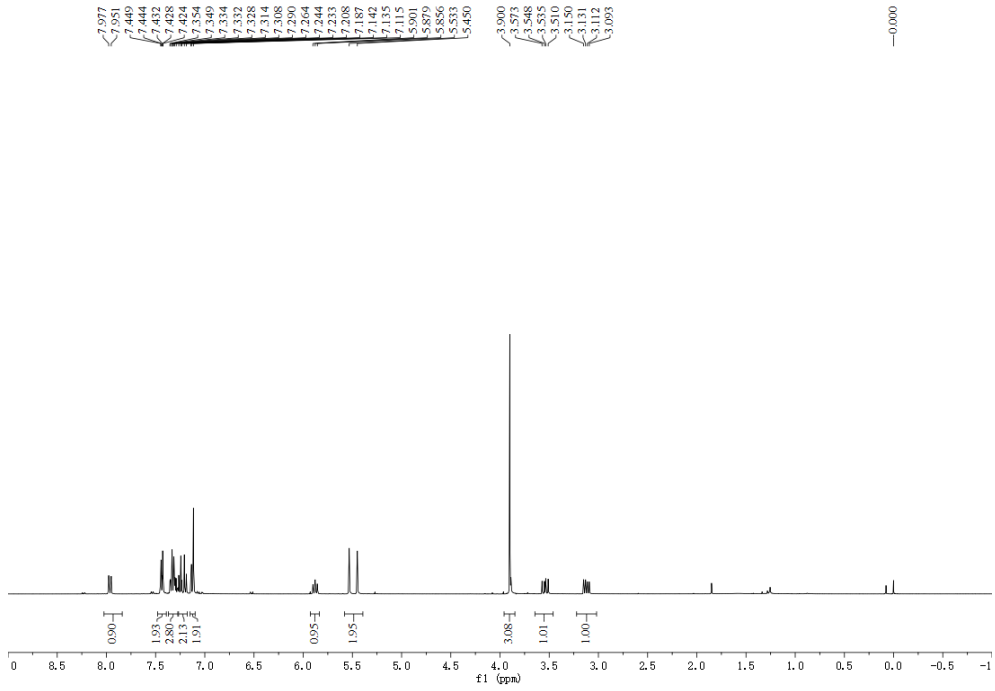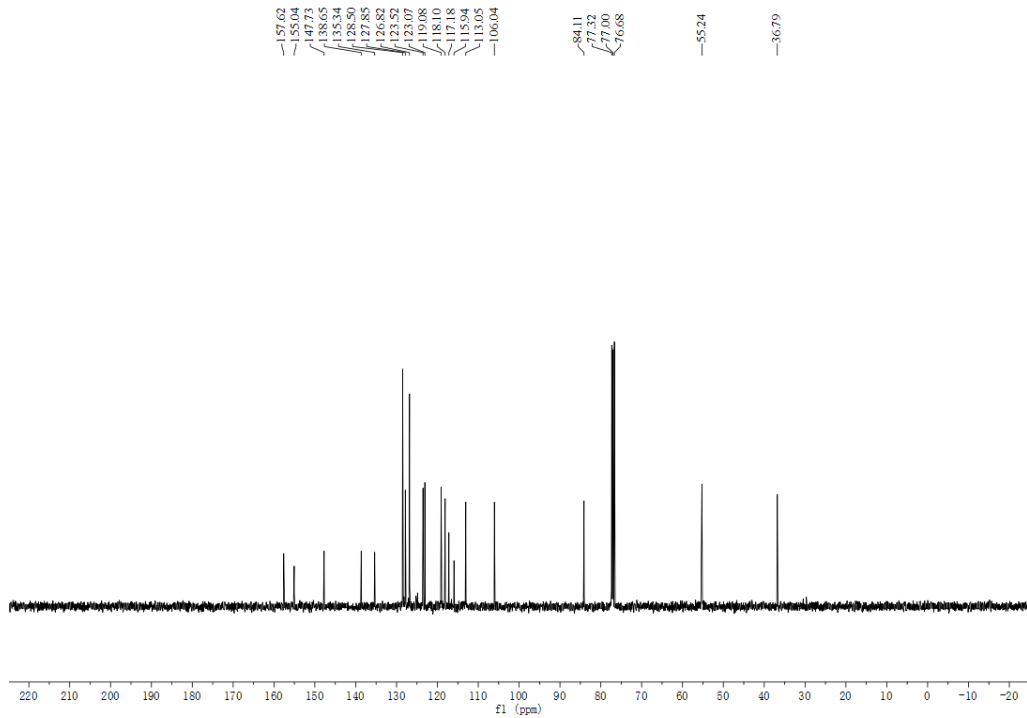

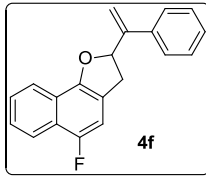

regioselectivity 2:1

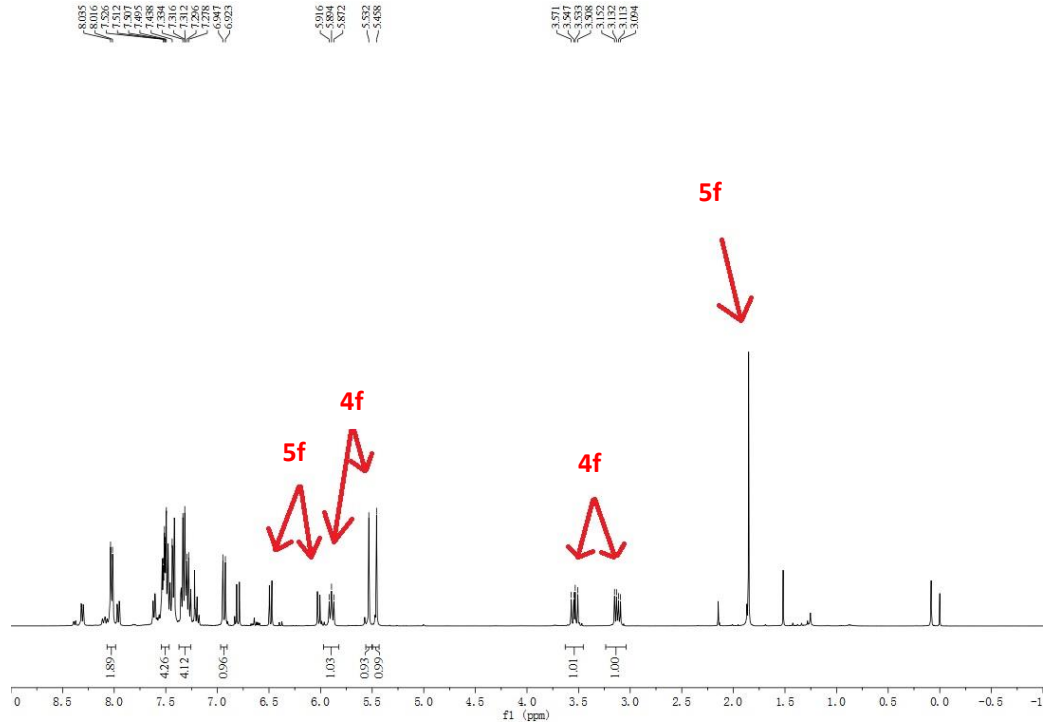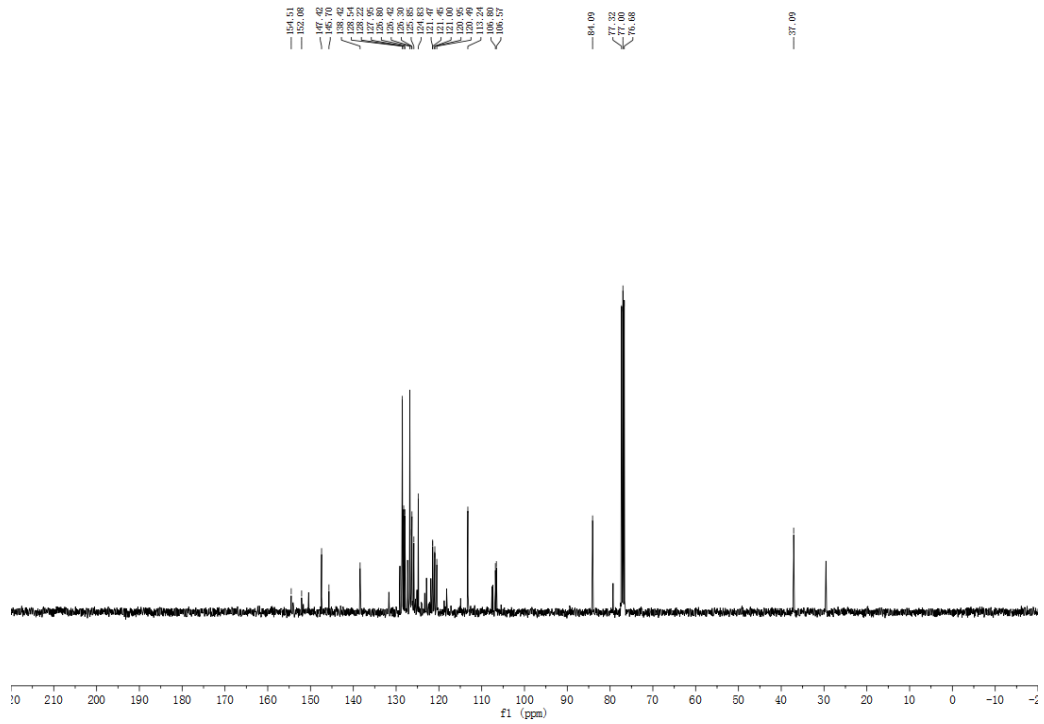

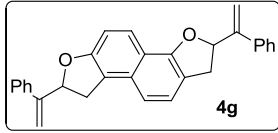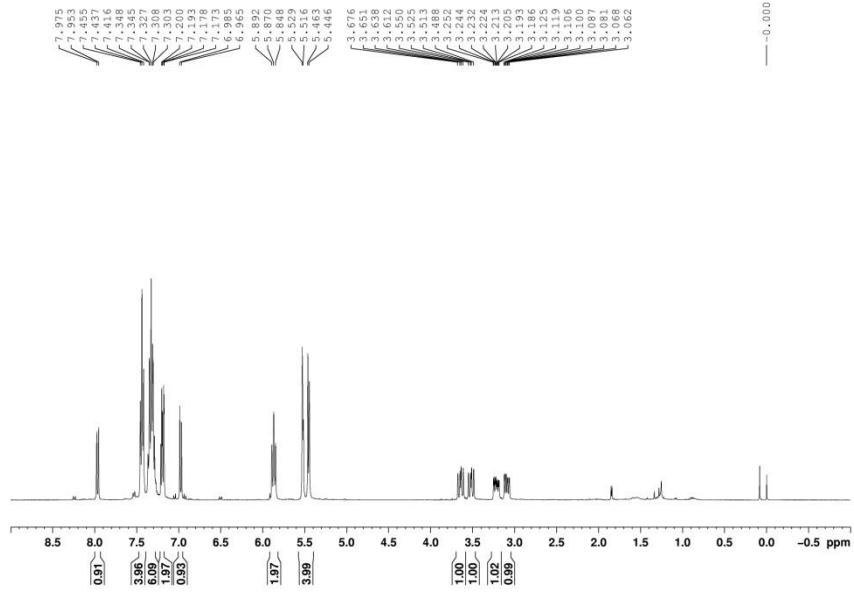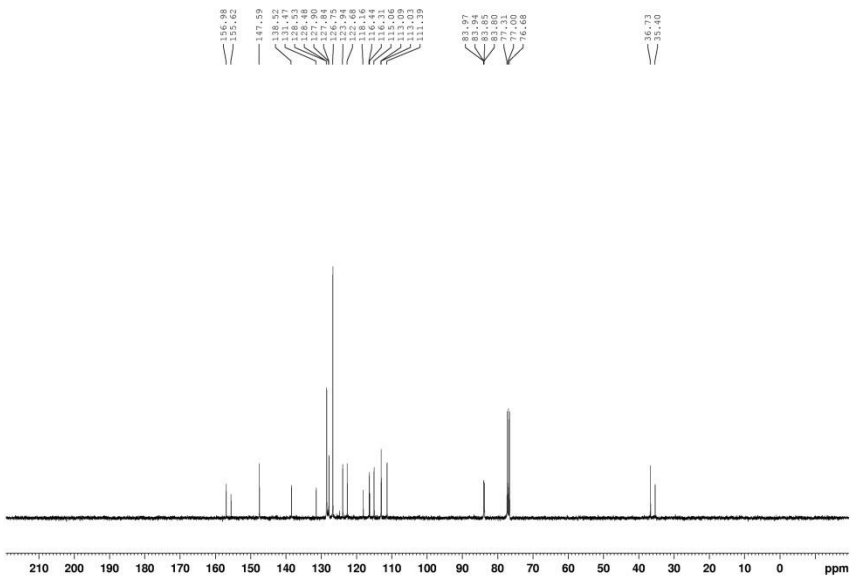

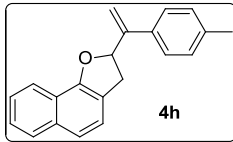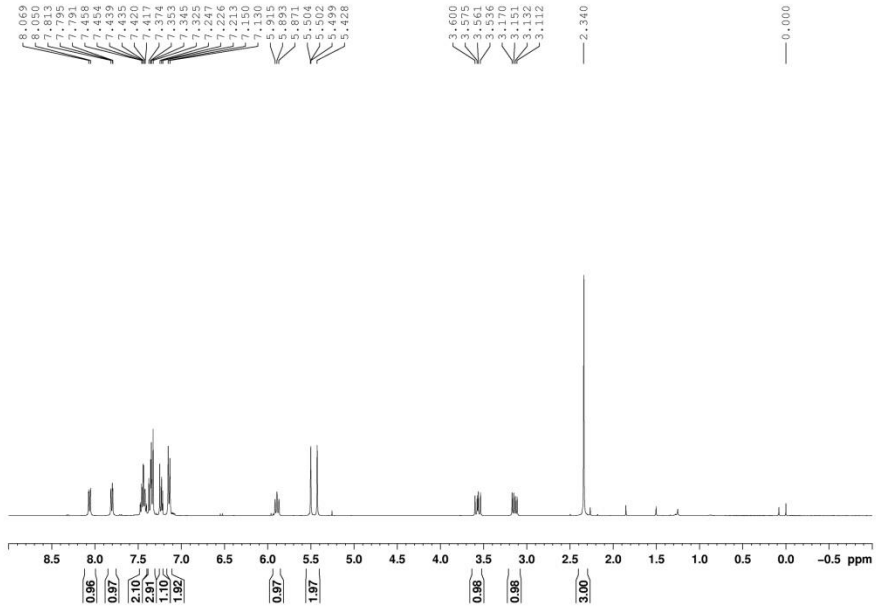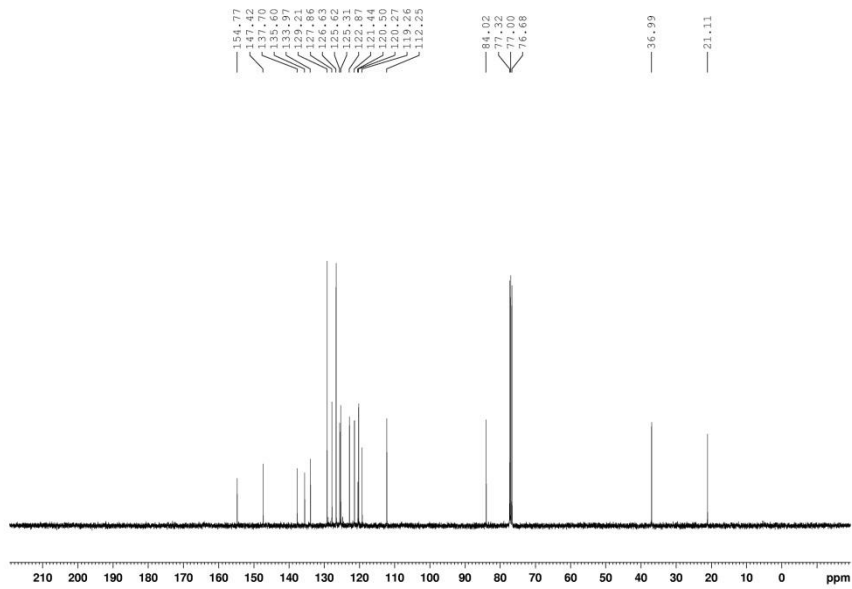

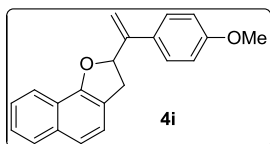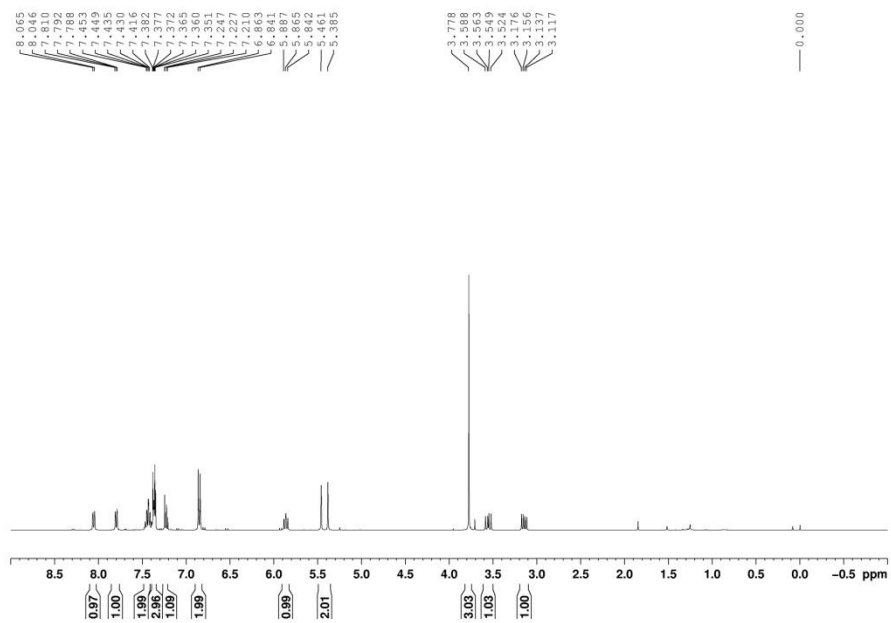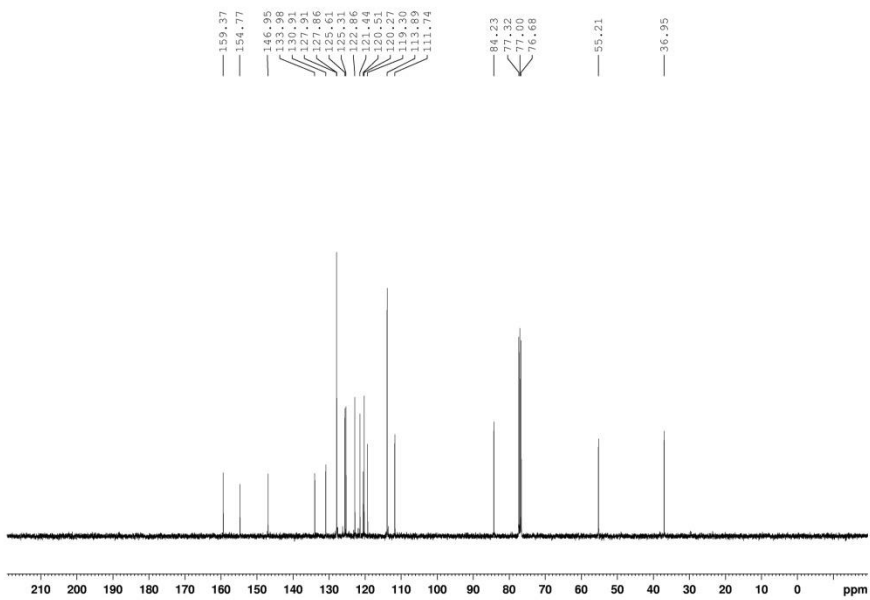

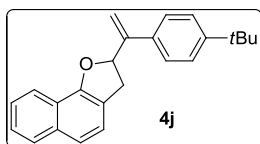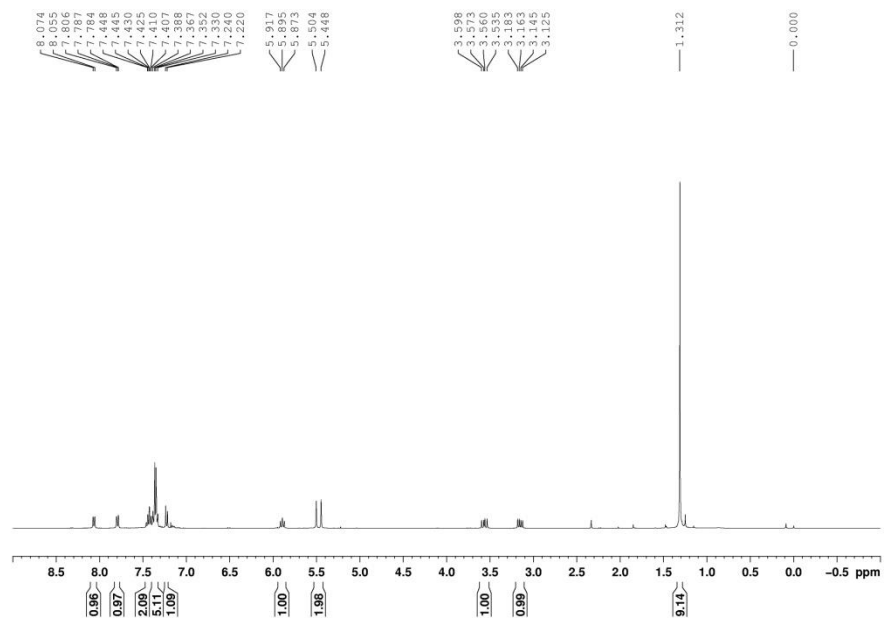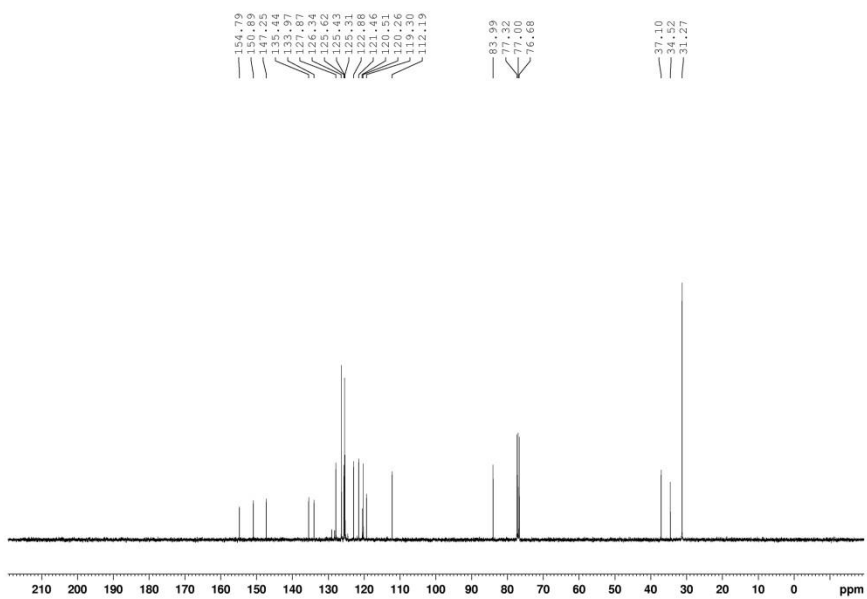

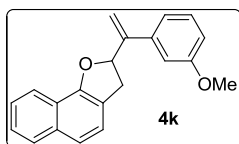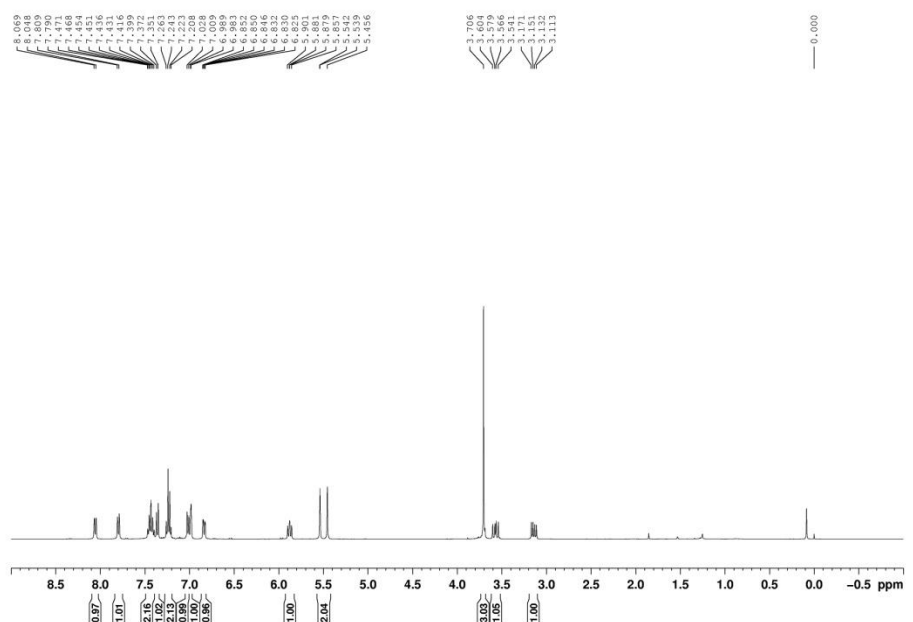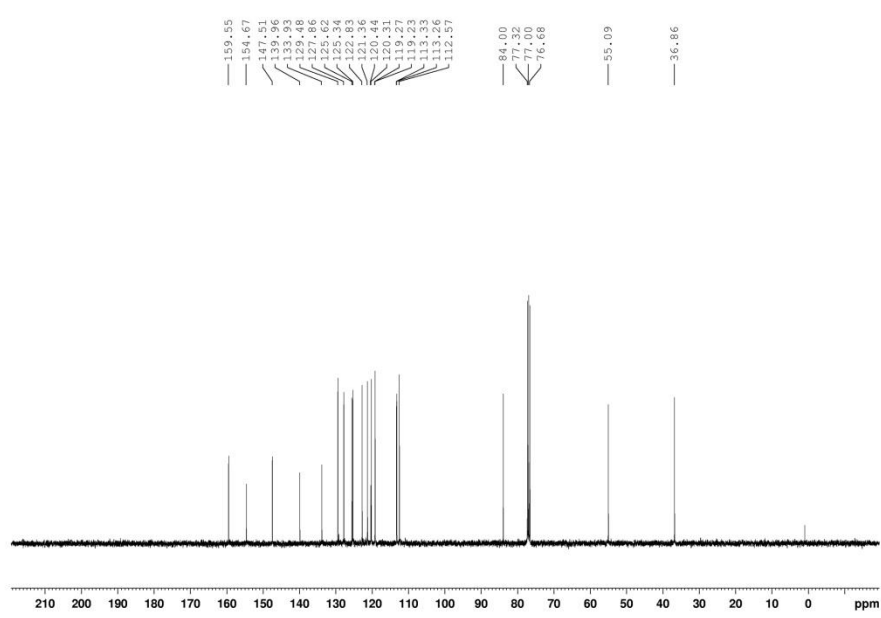



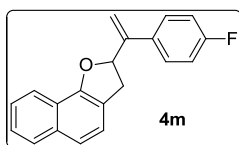

regioselectivity 14:1

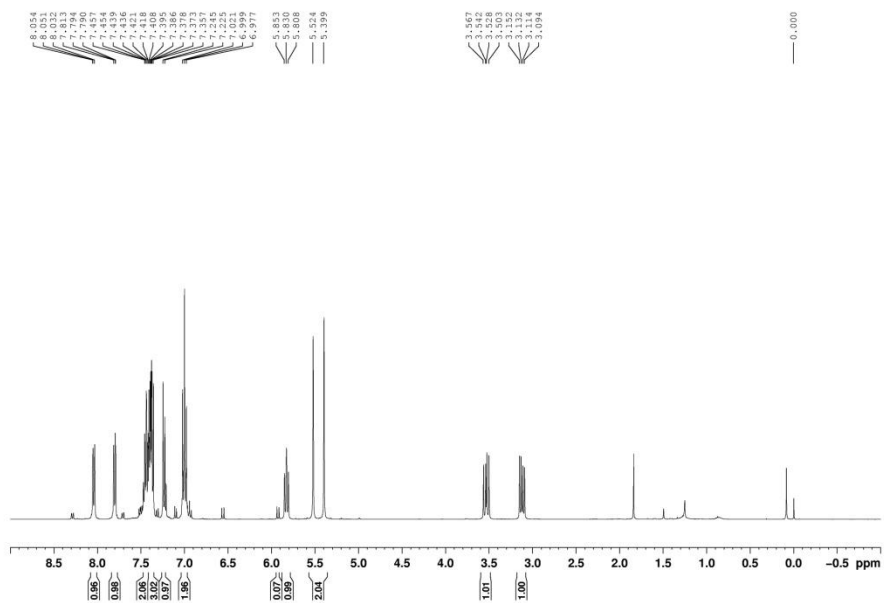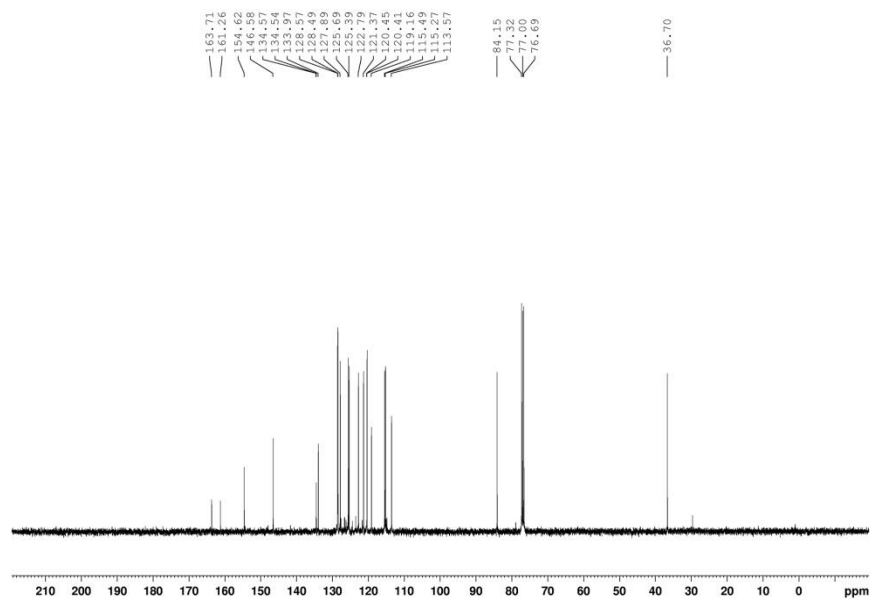

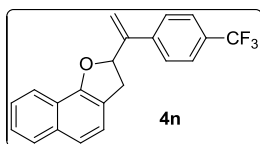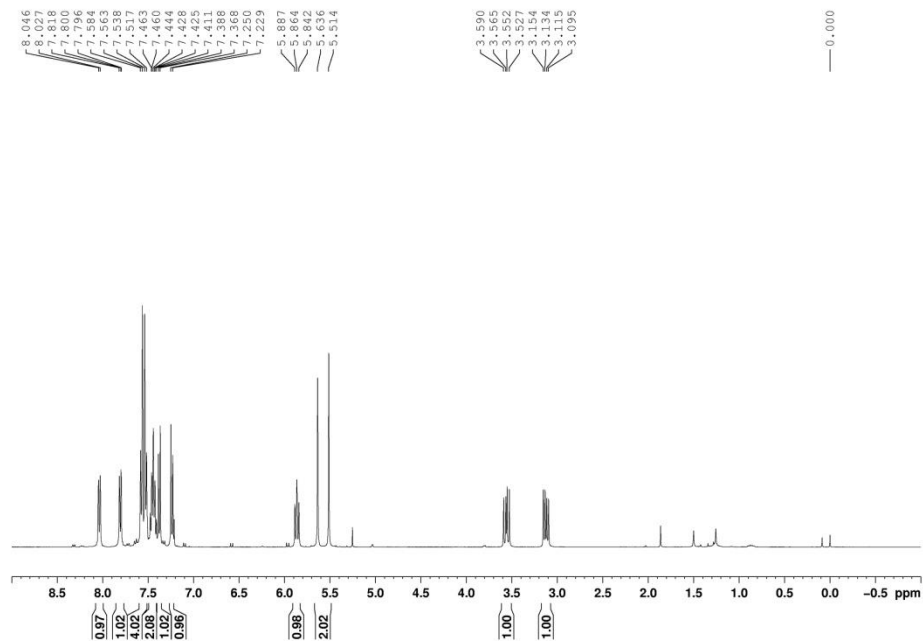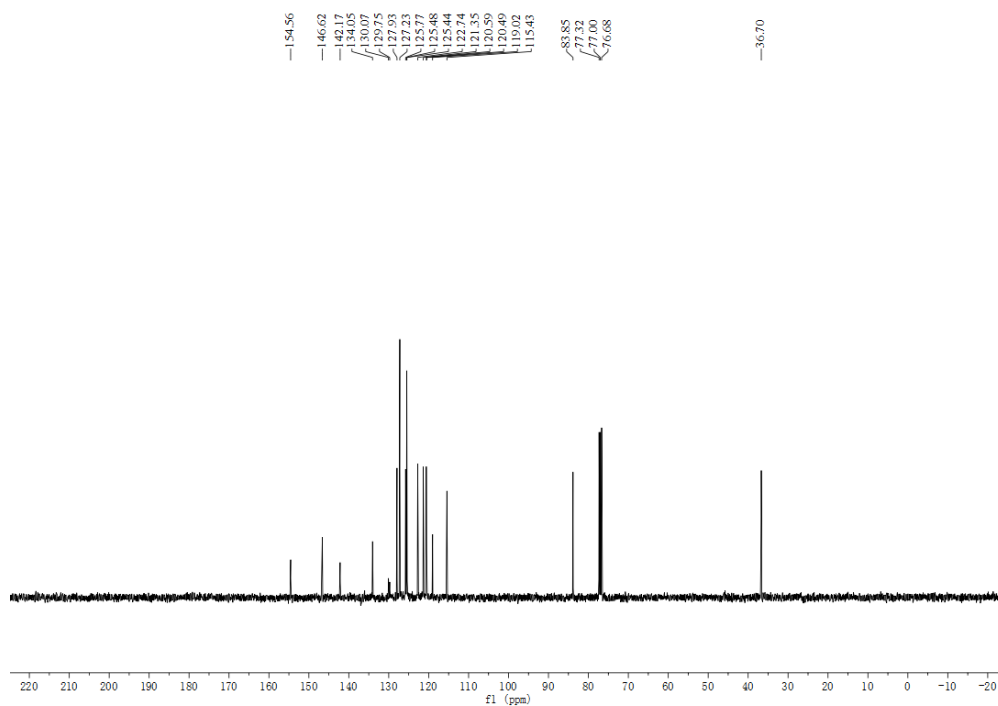

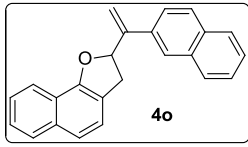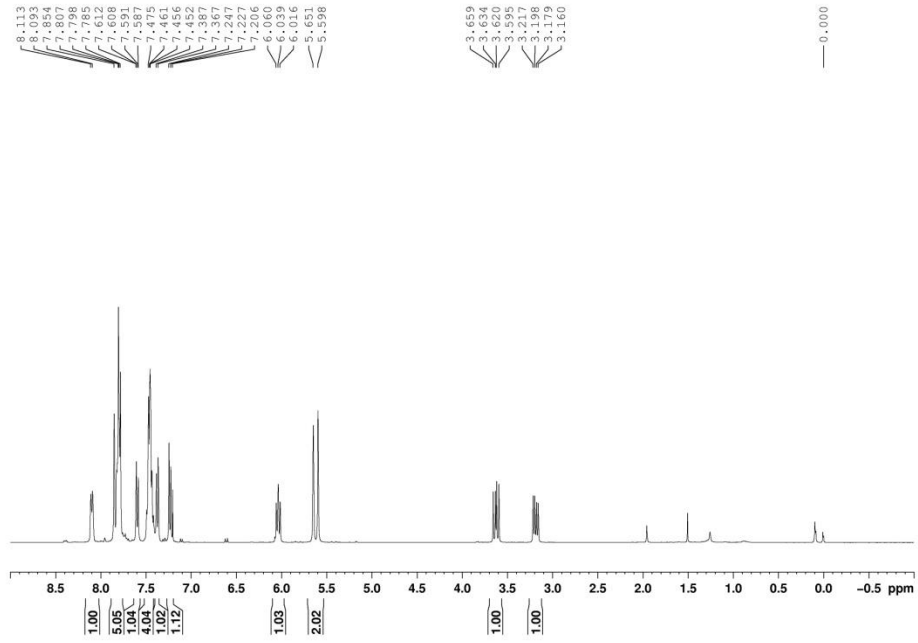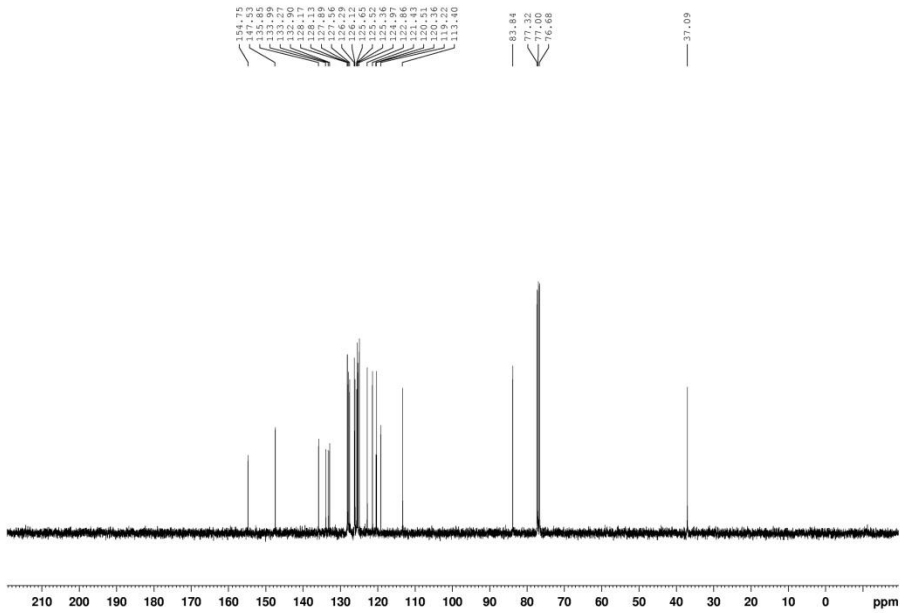

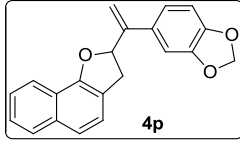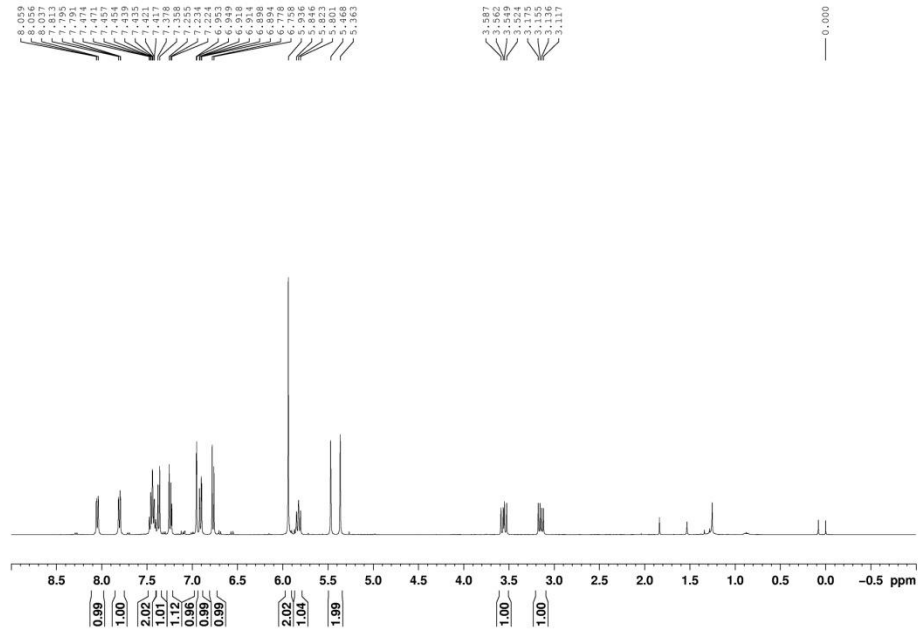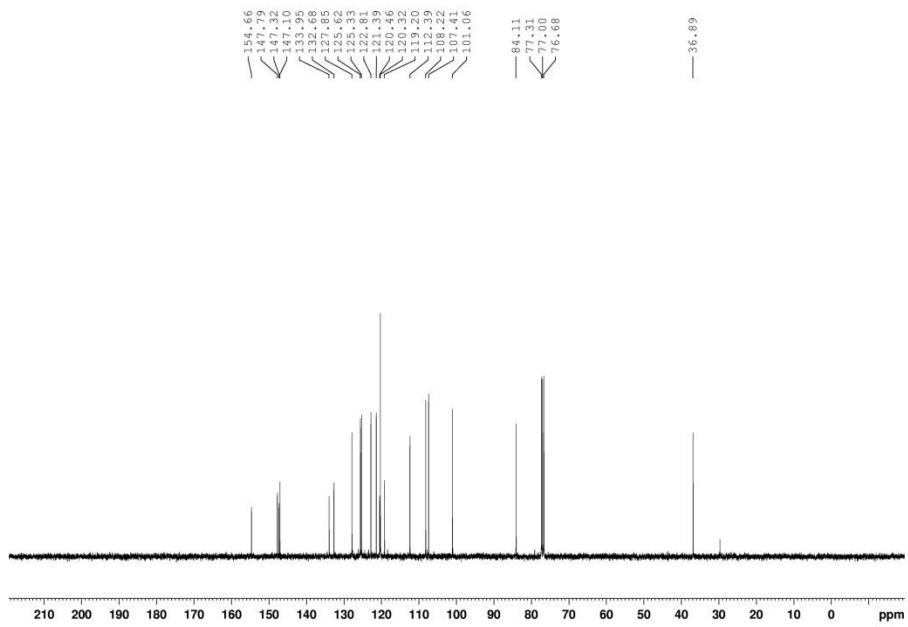

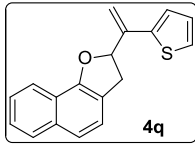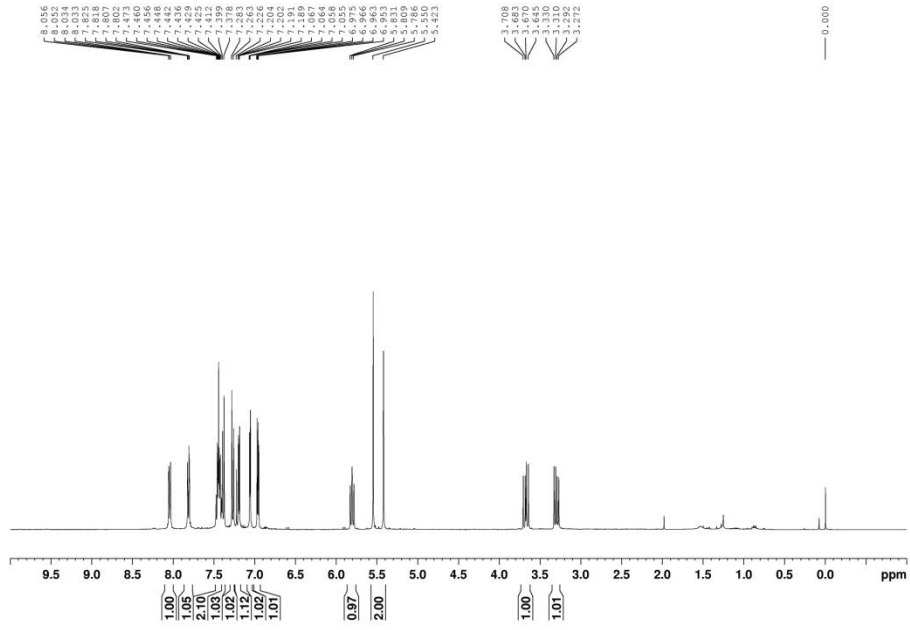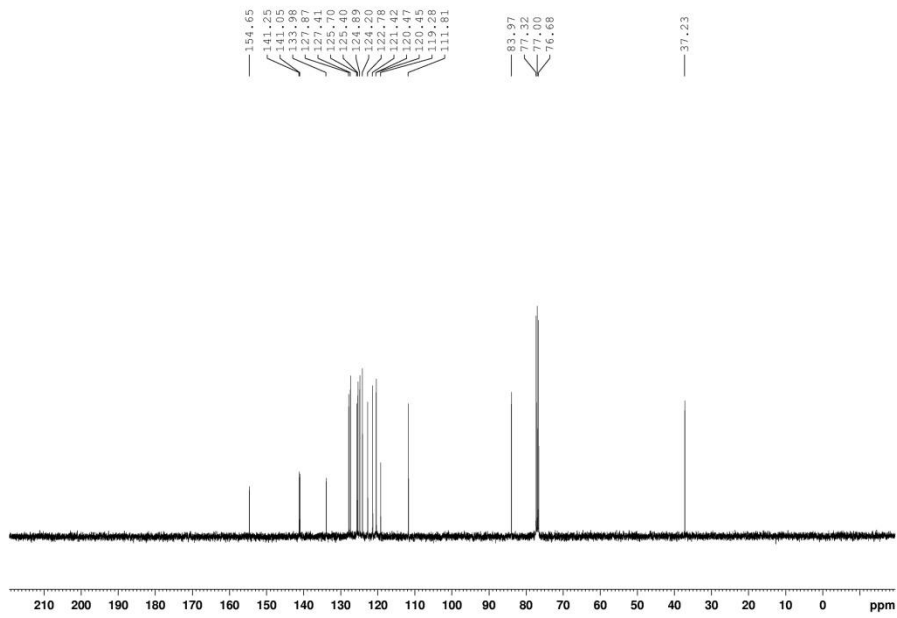

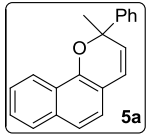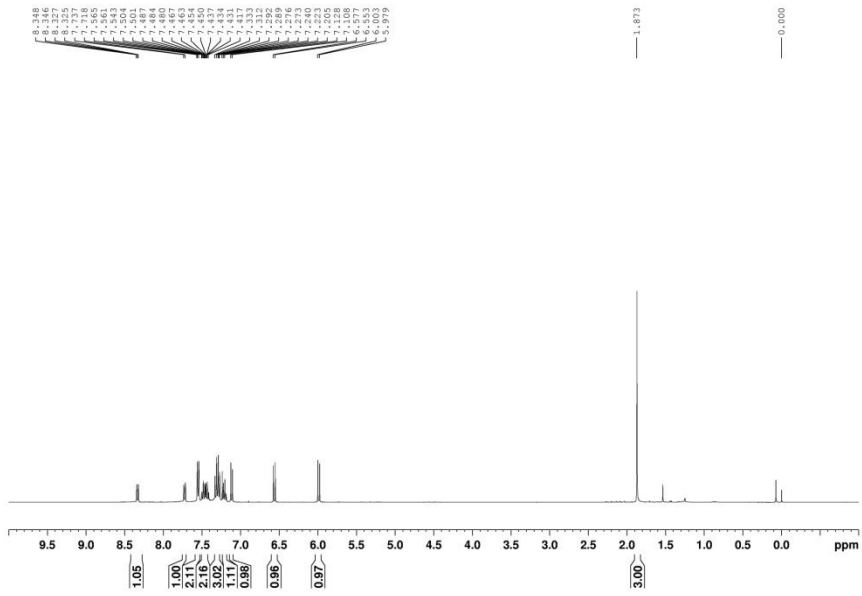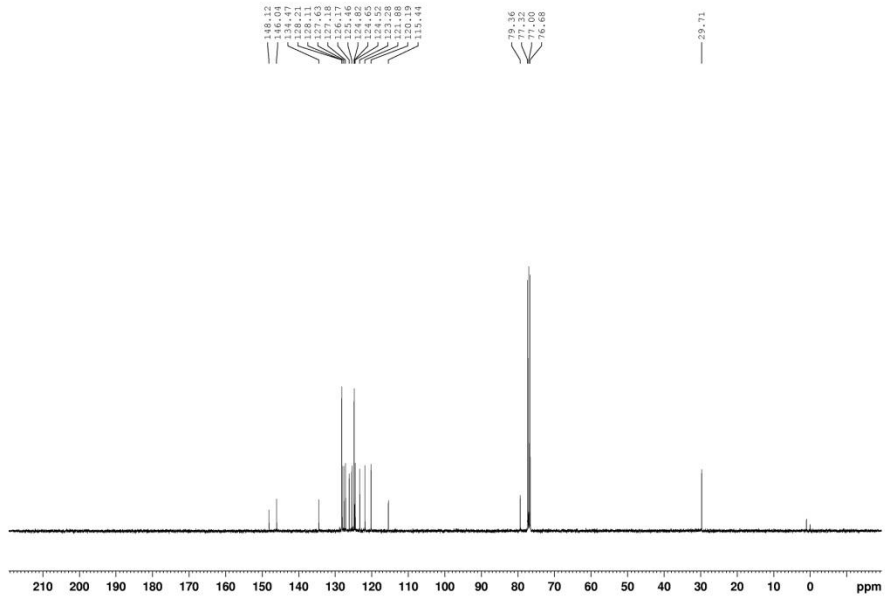

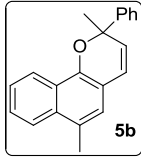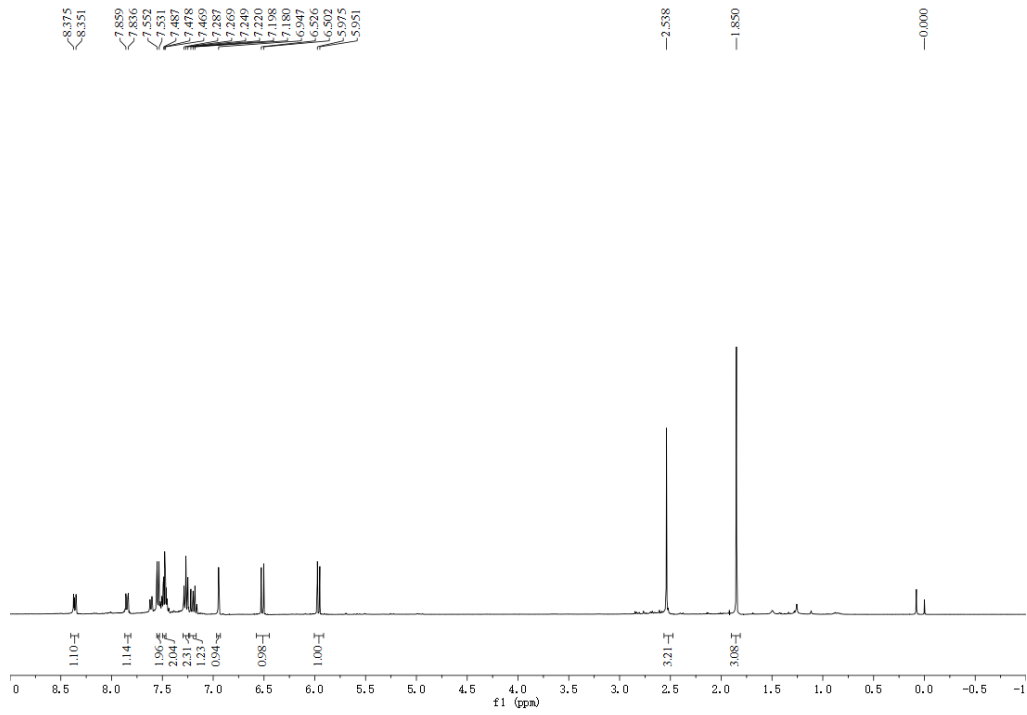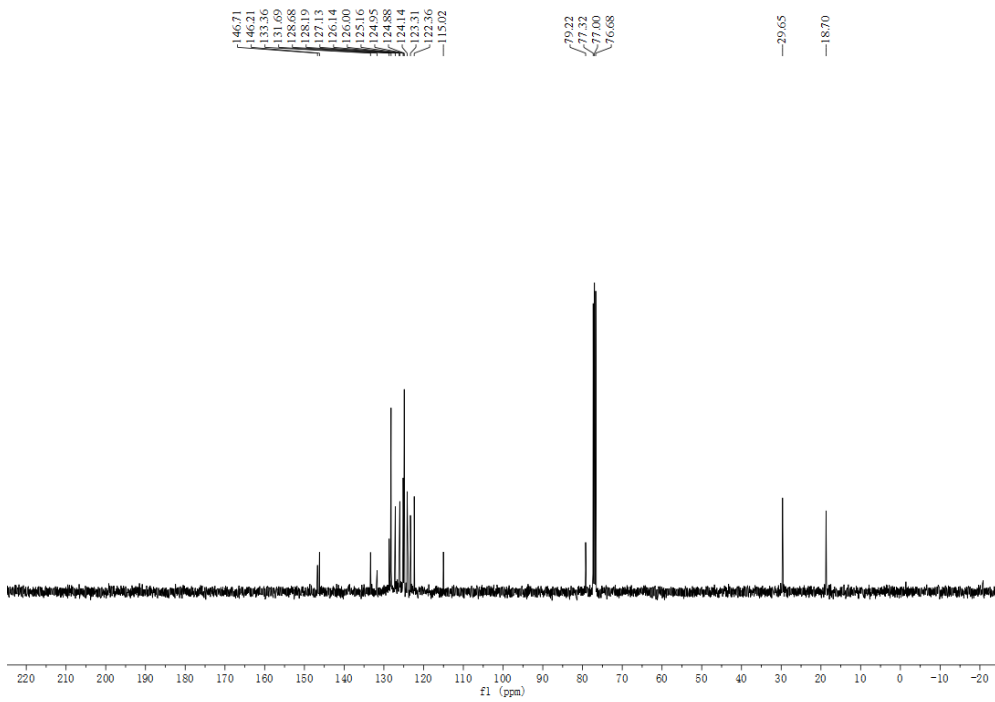

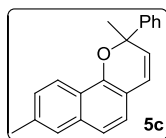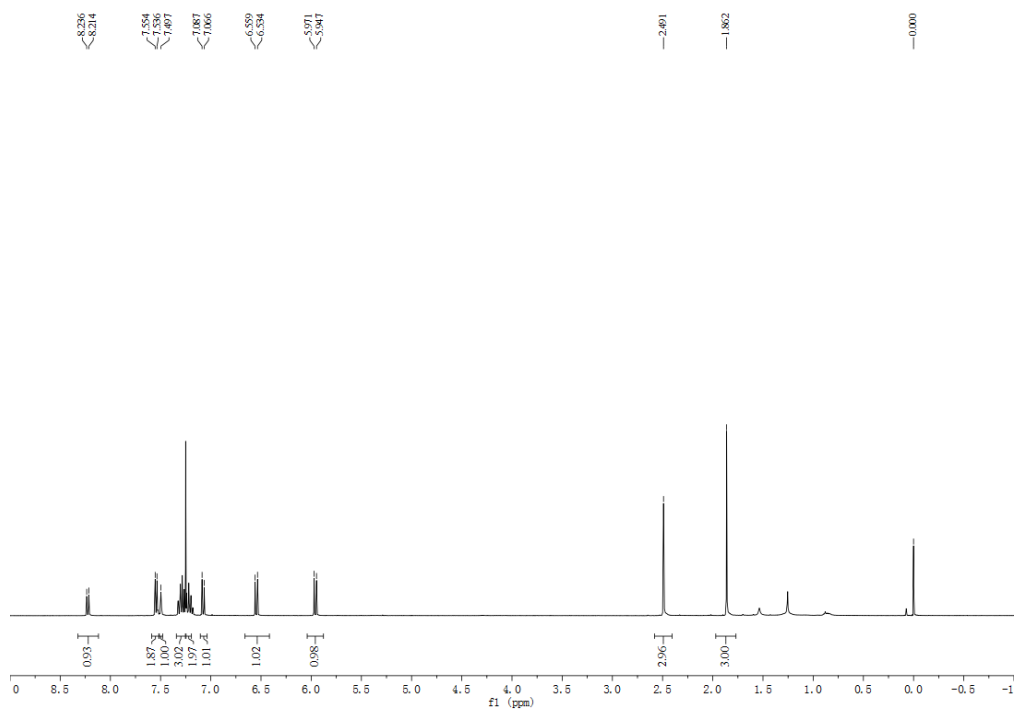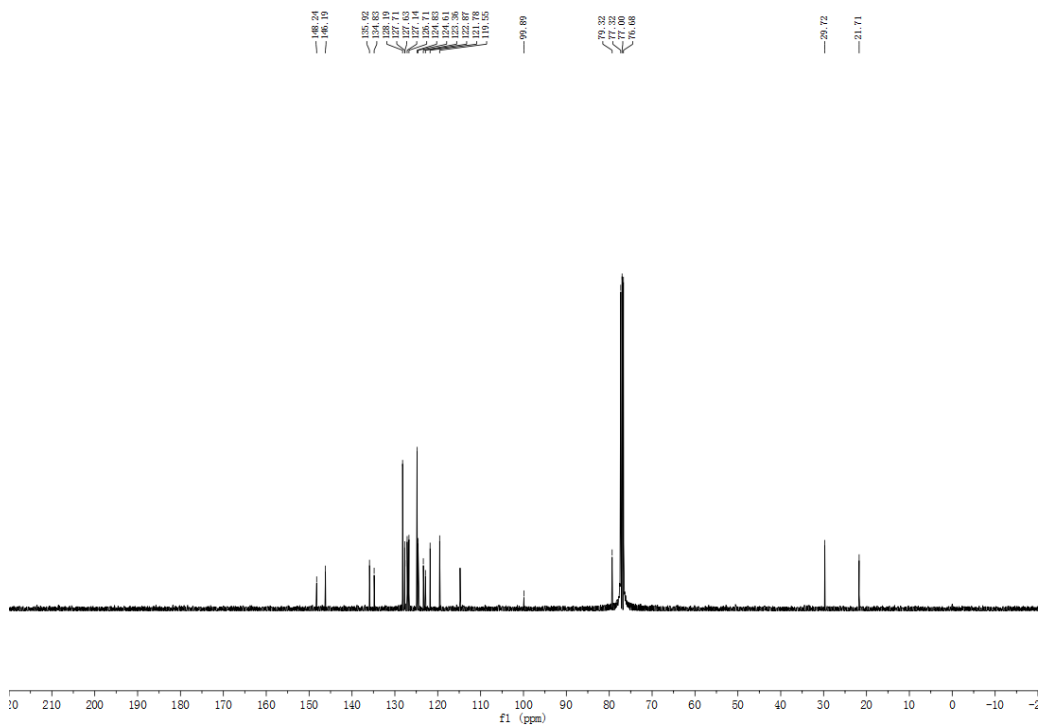



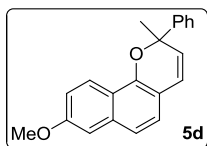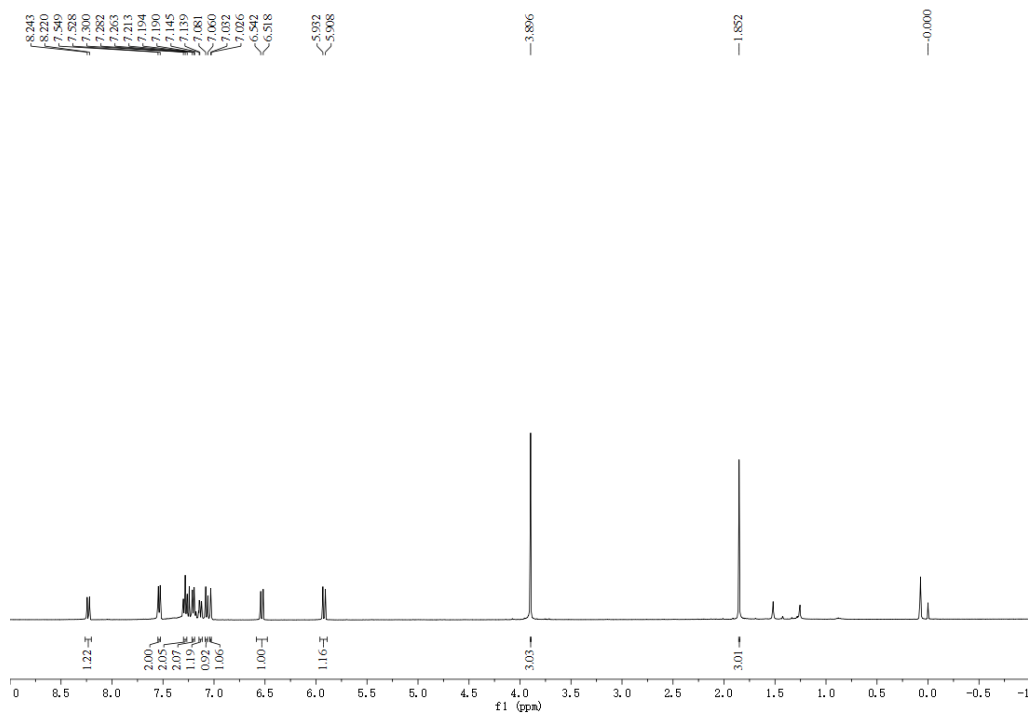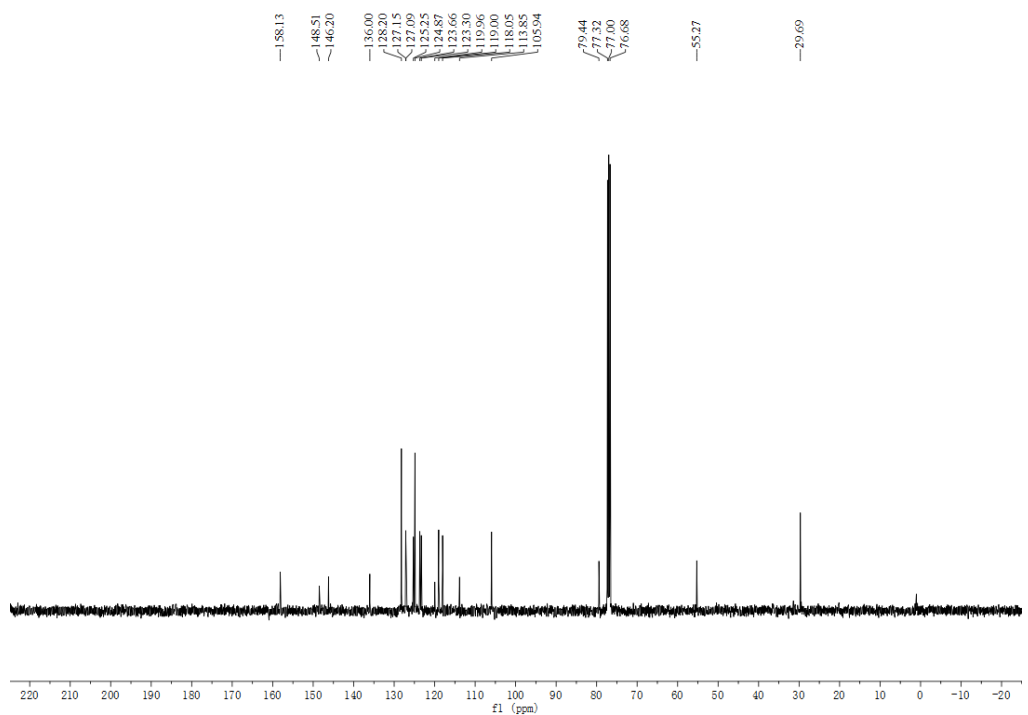

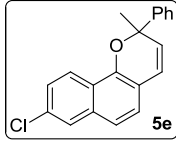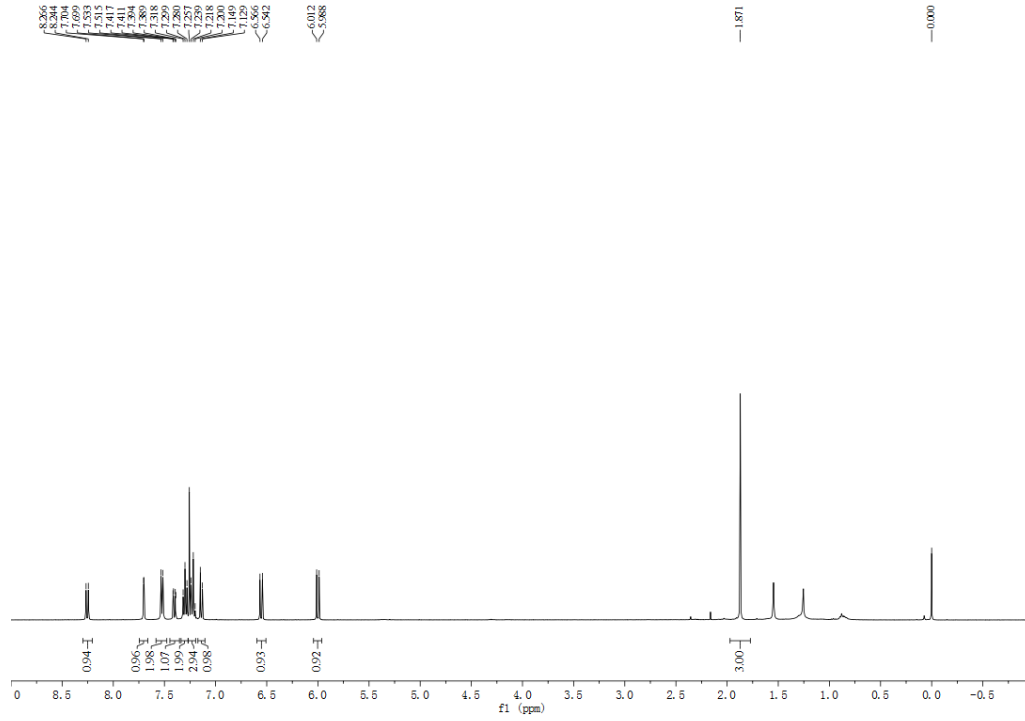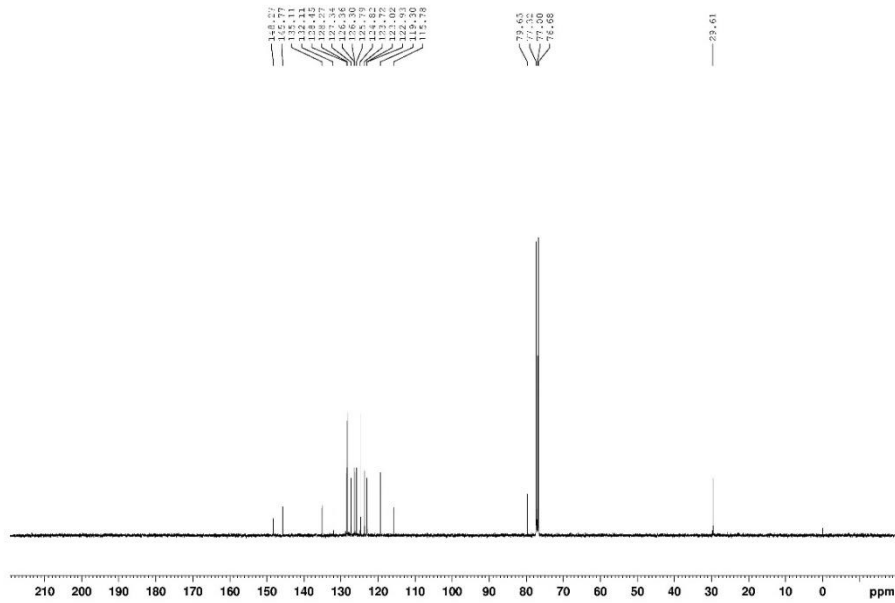

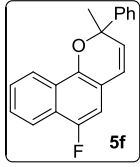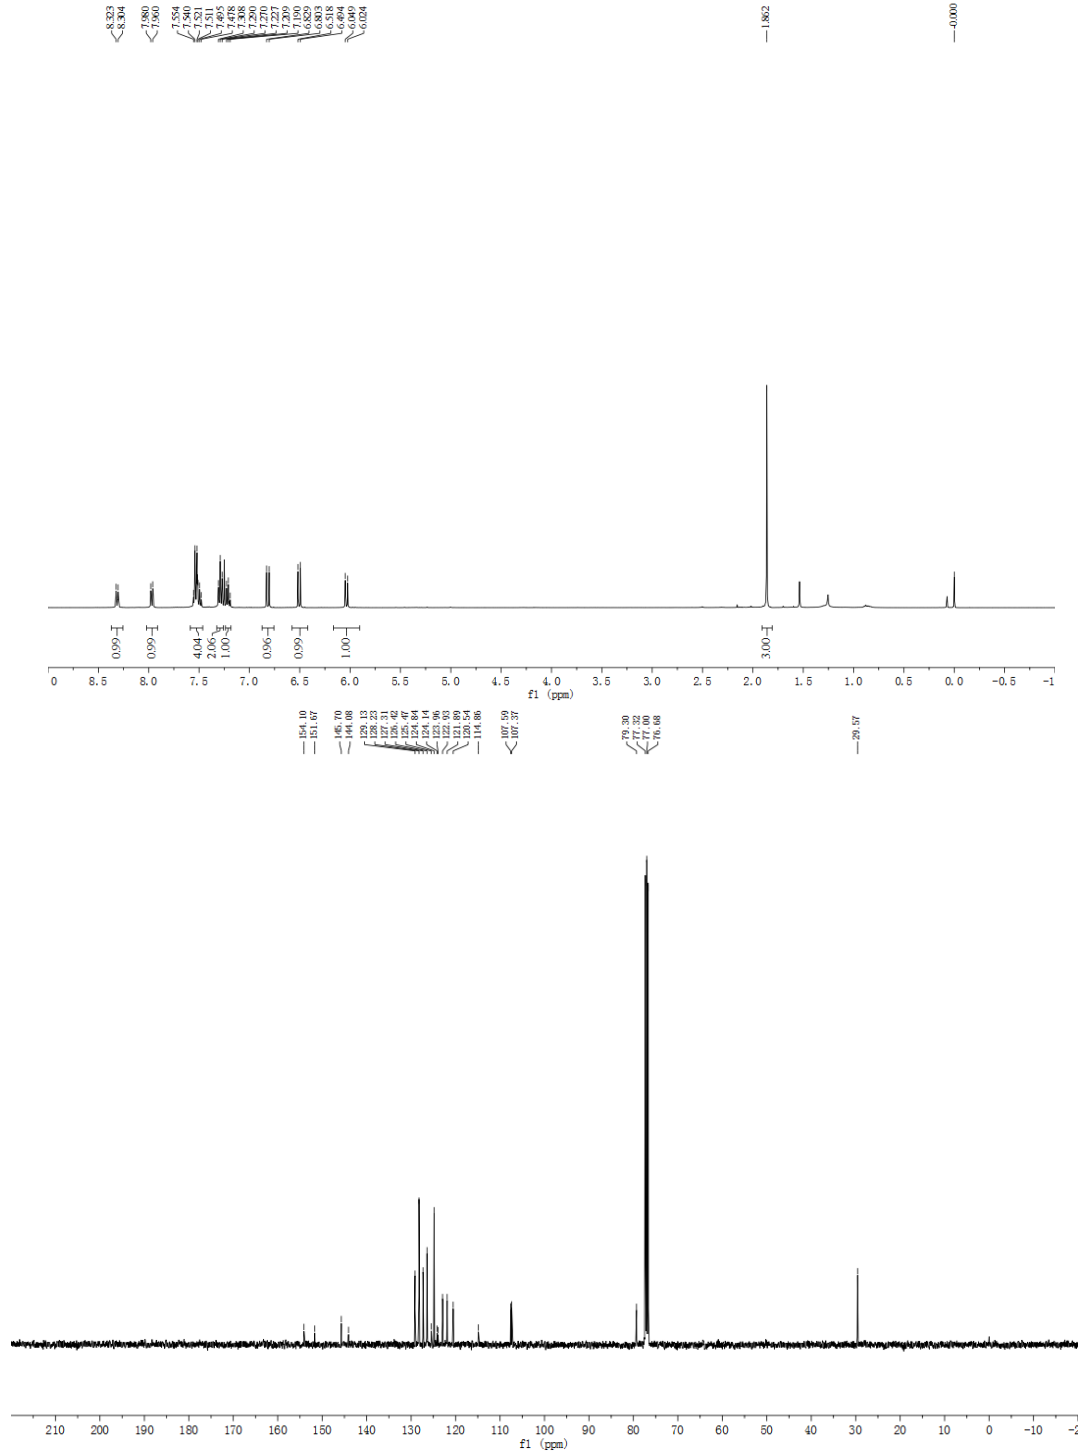

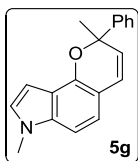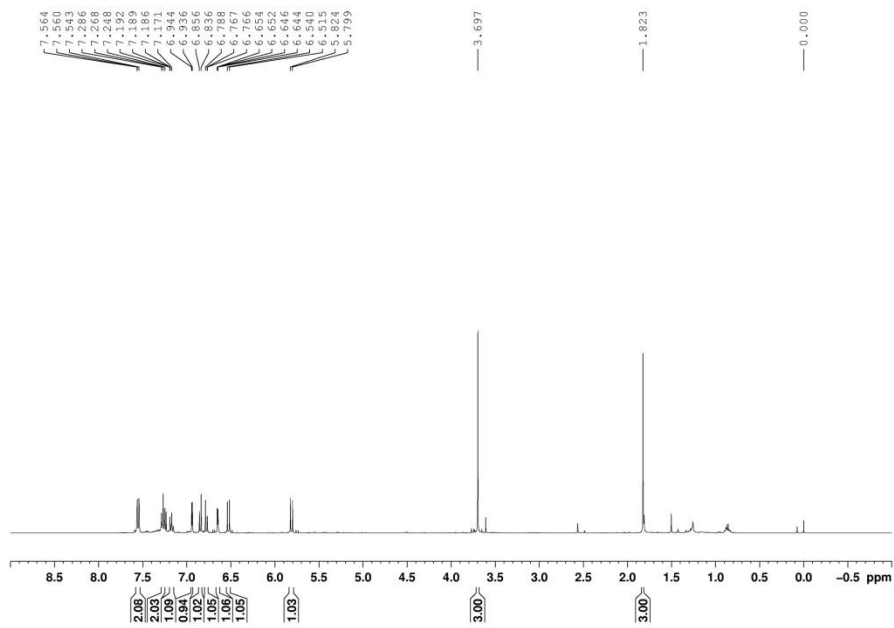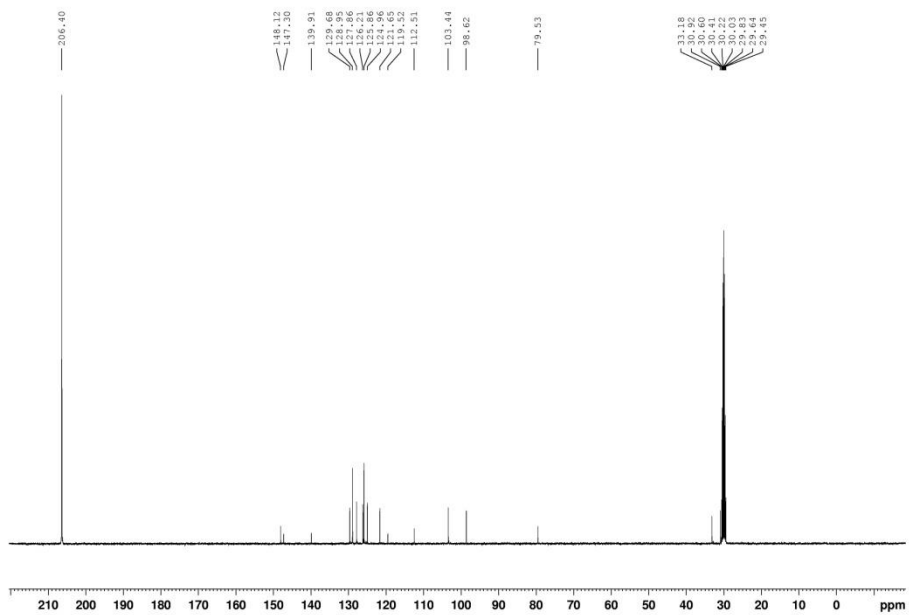

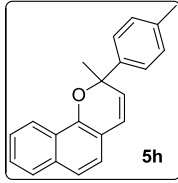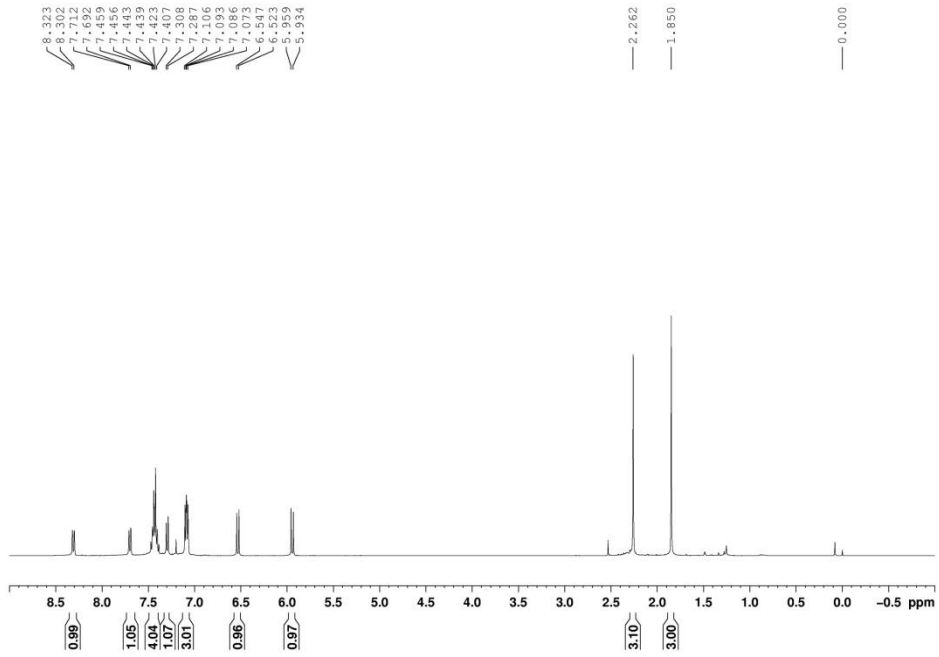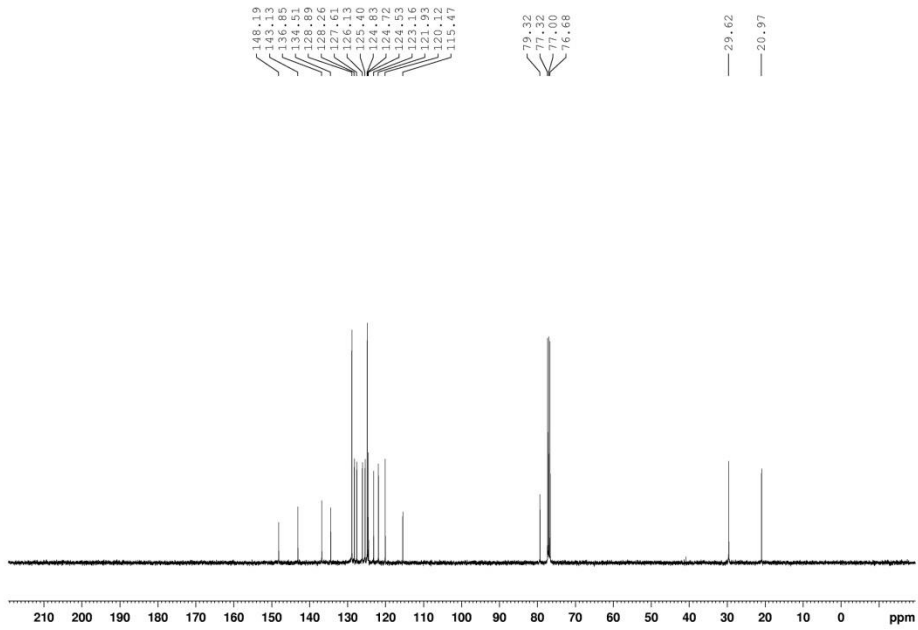

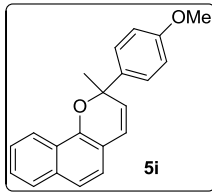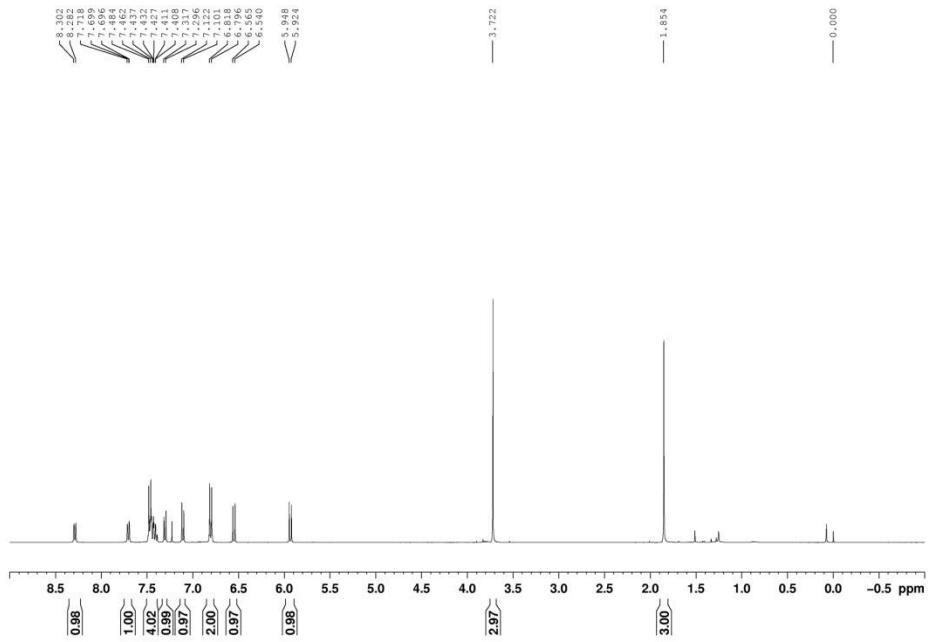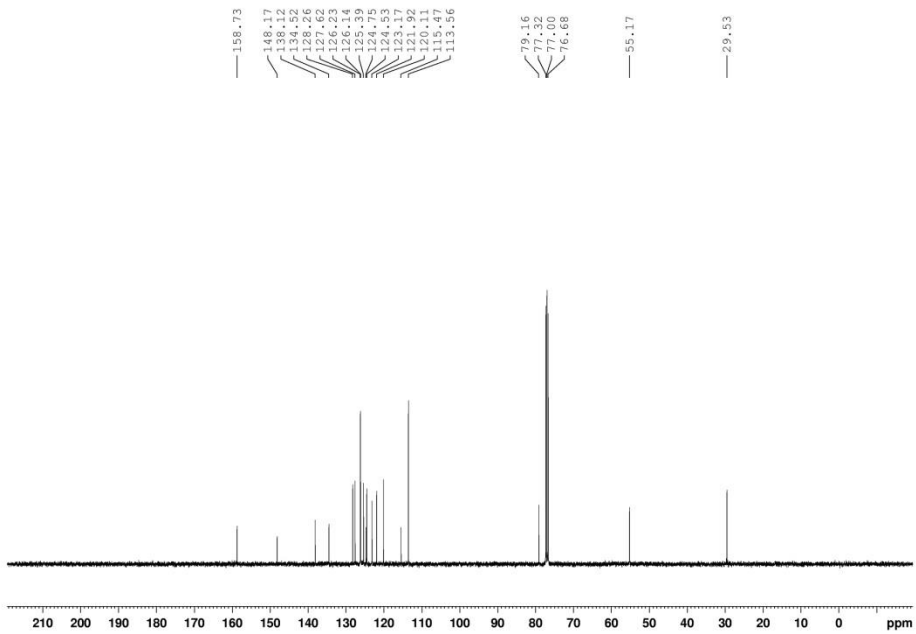

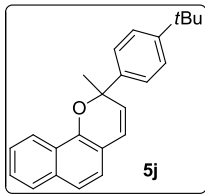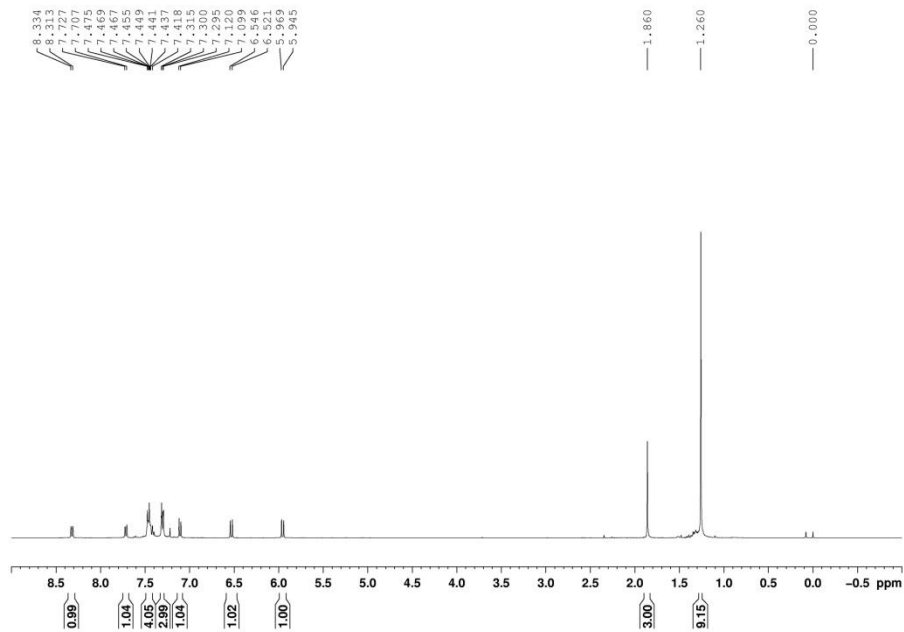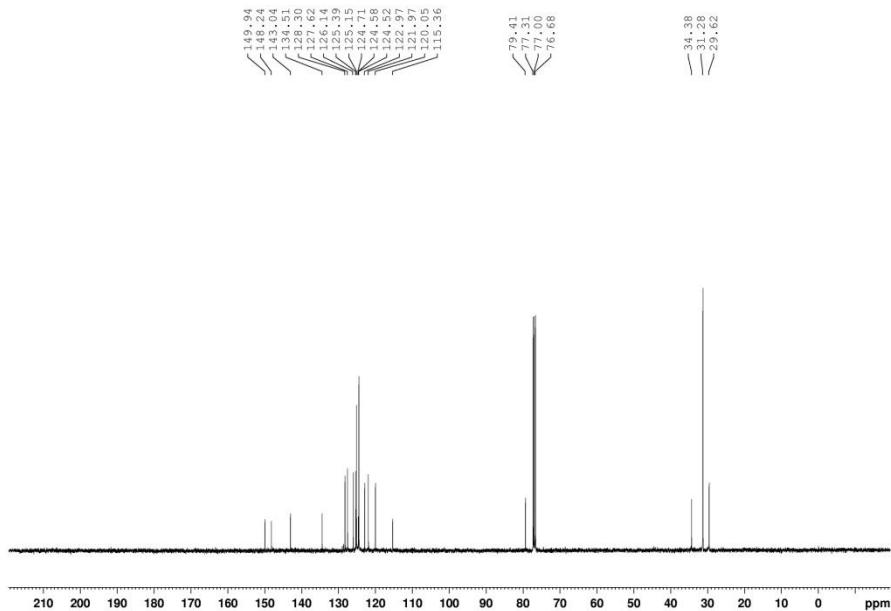

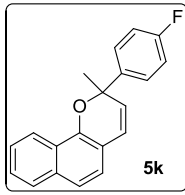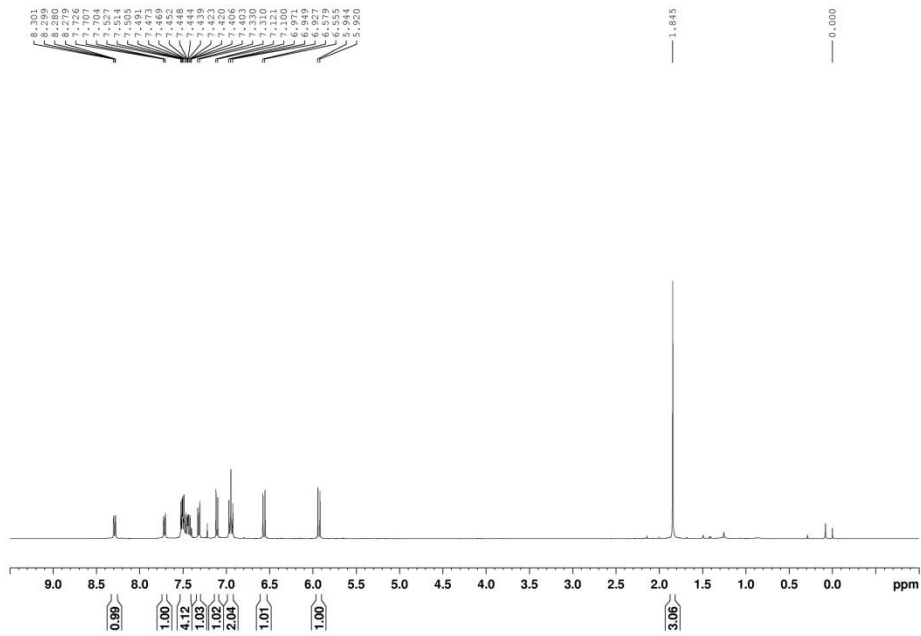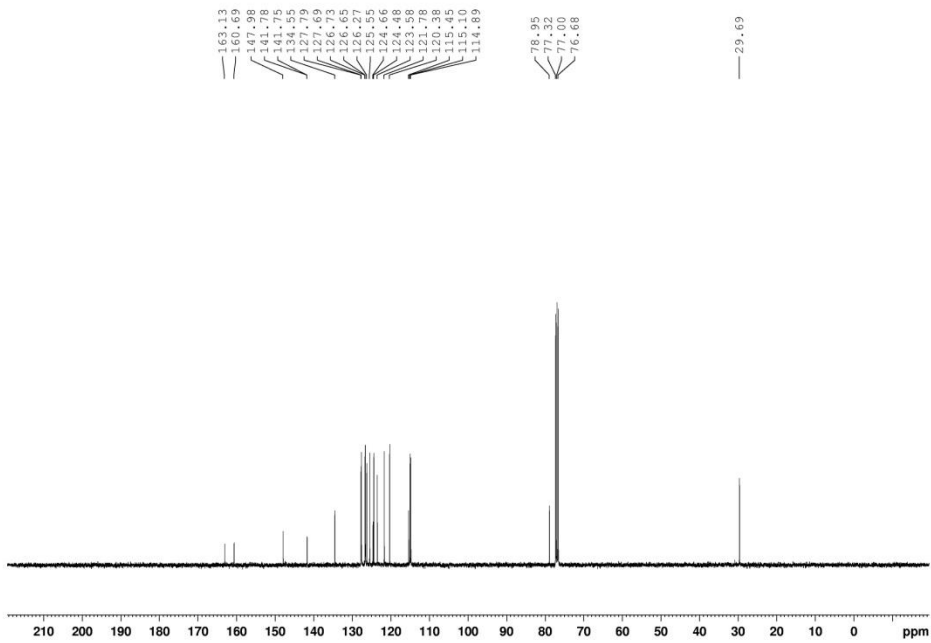



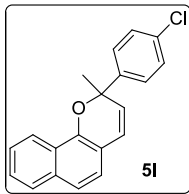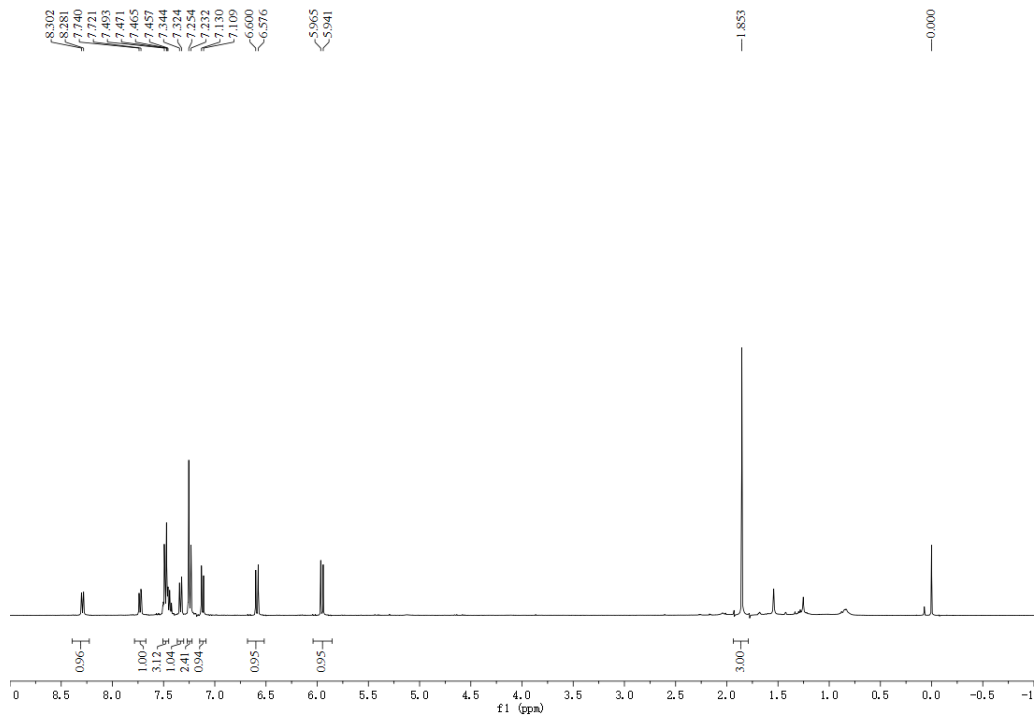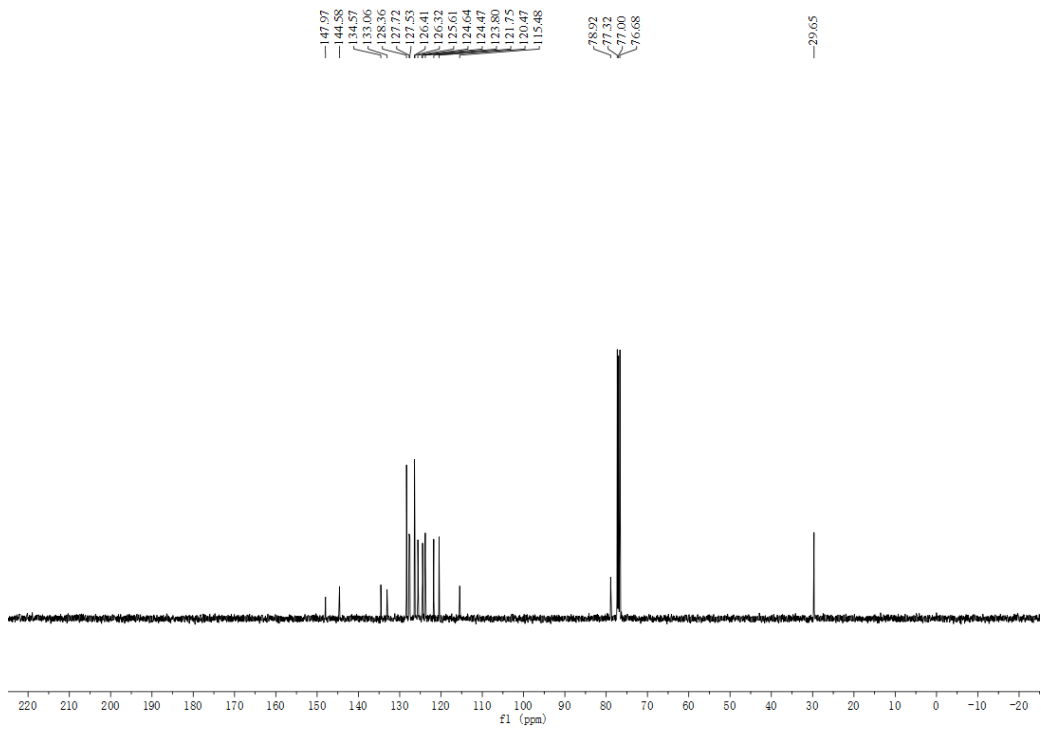

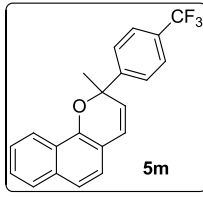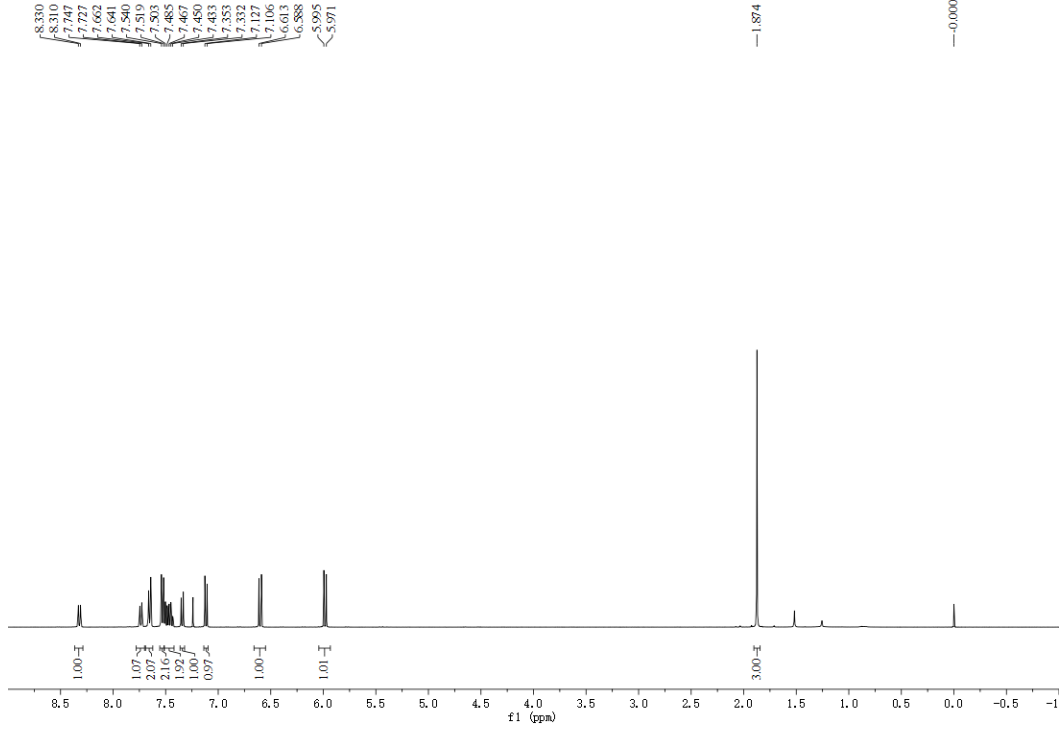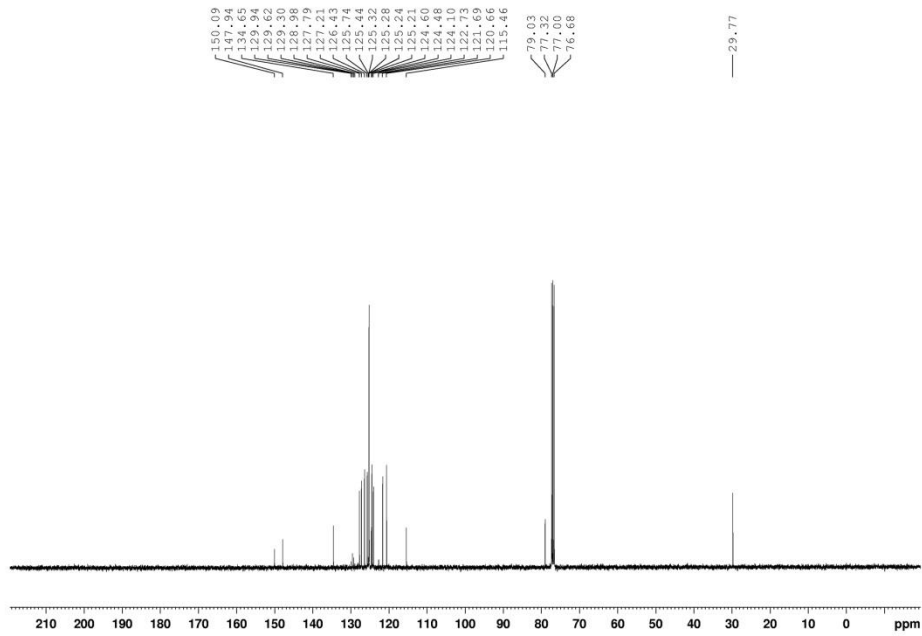

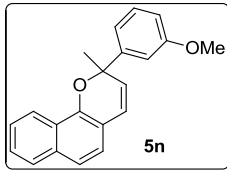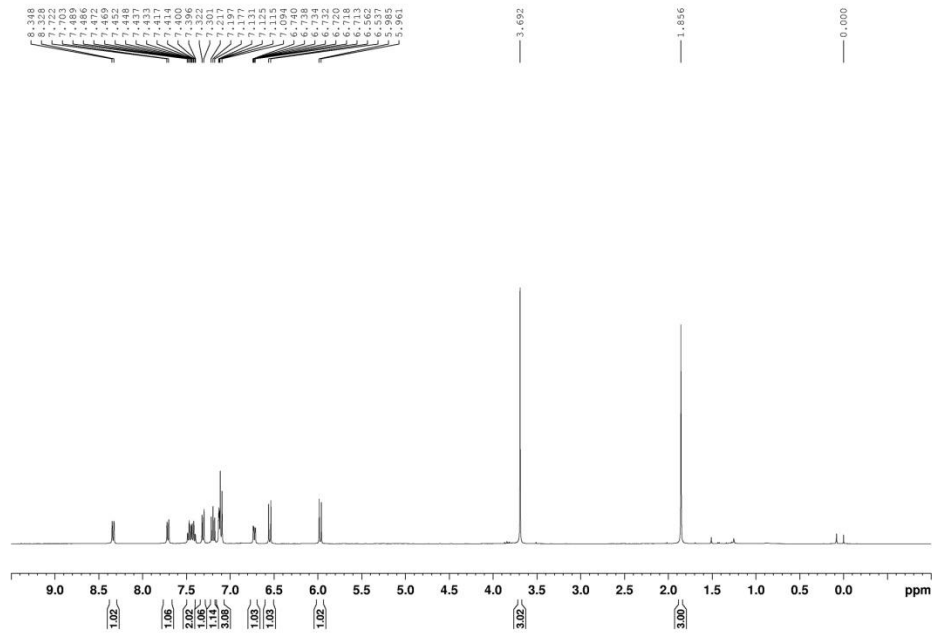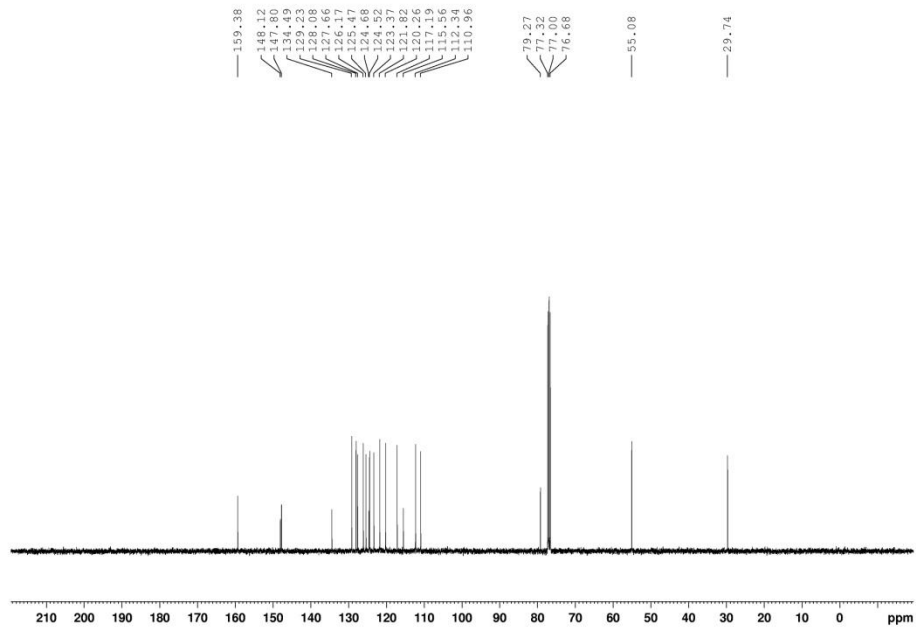



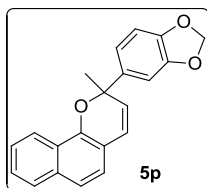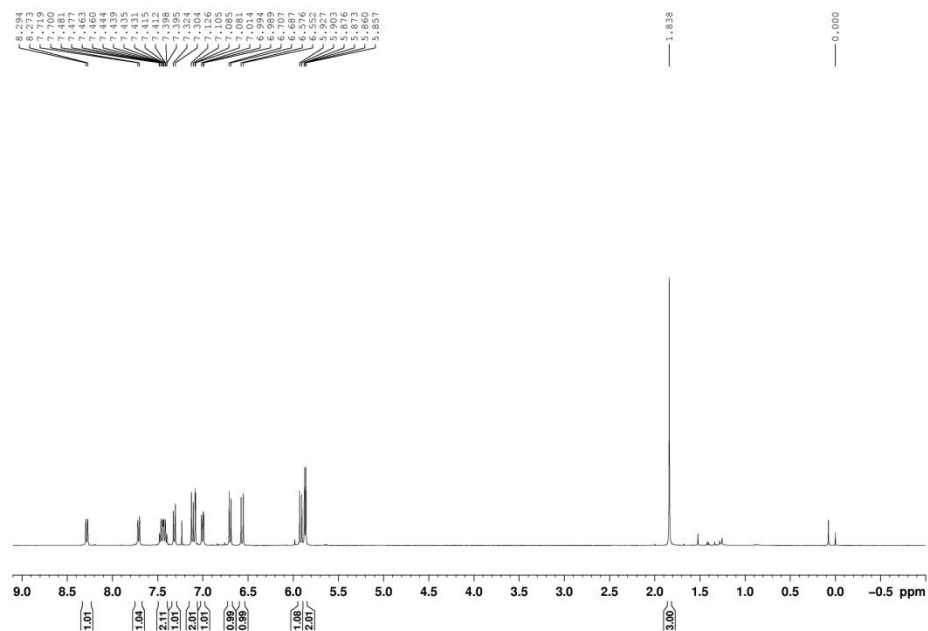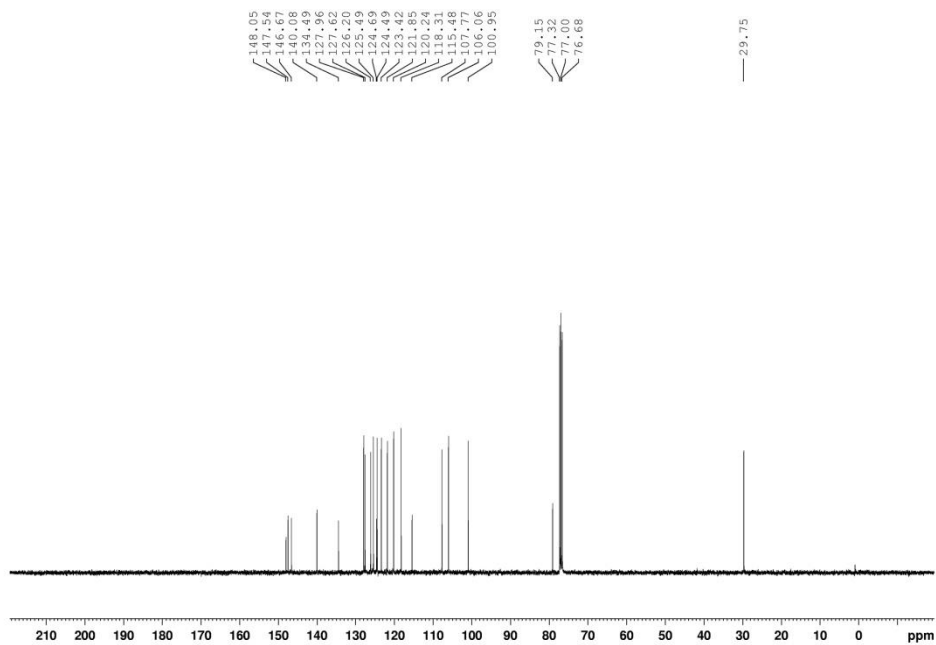

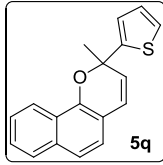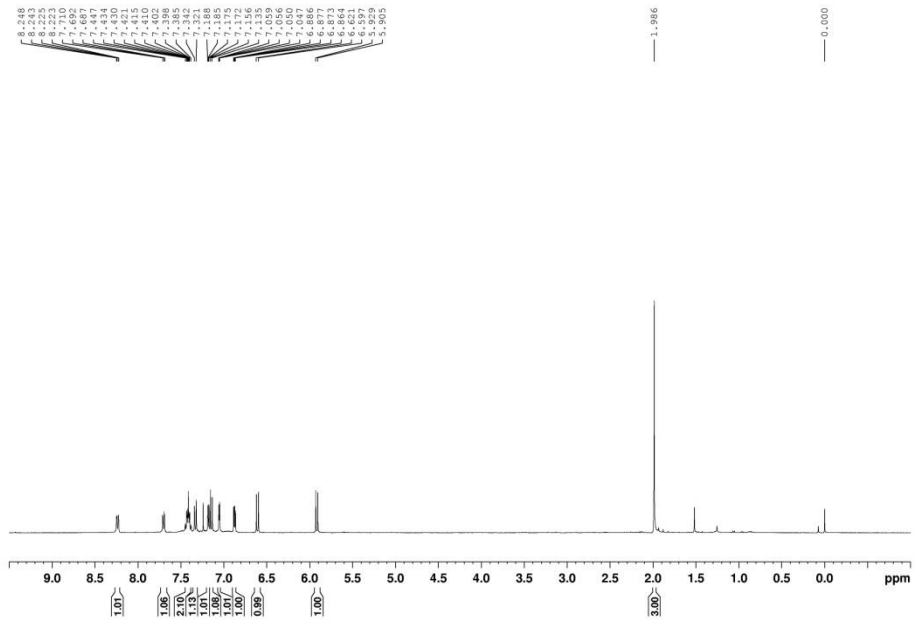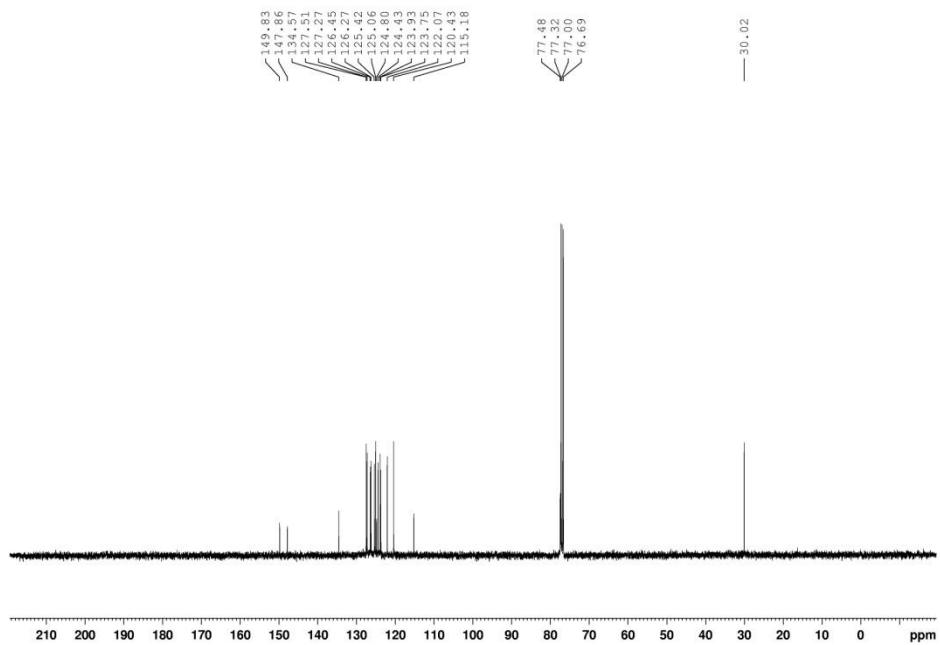

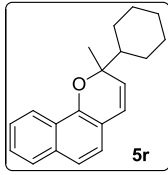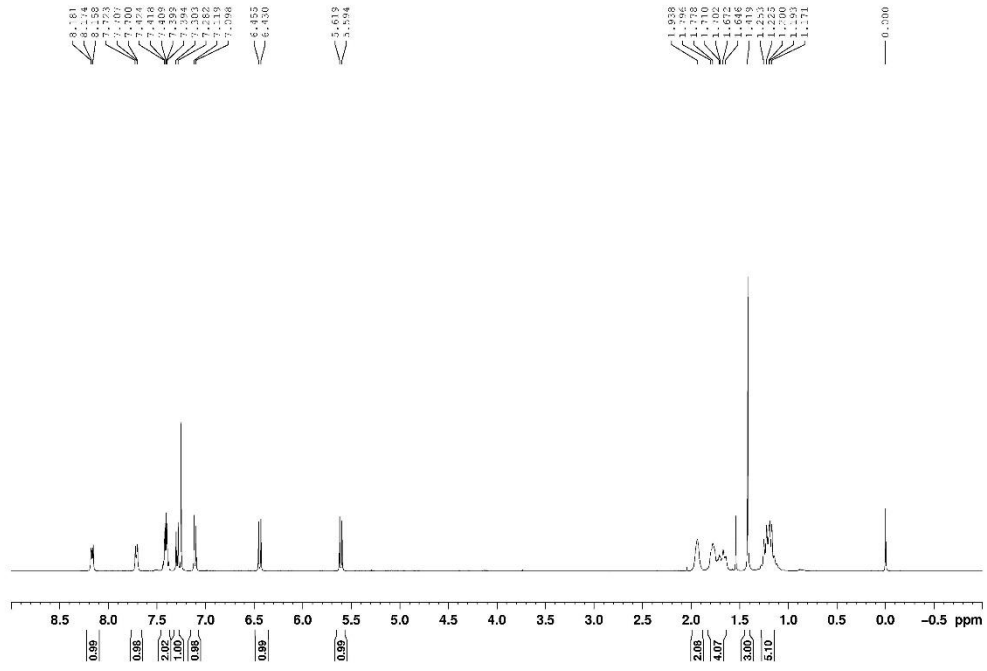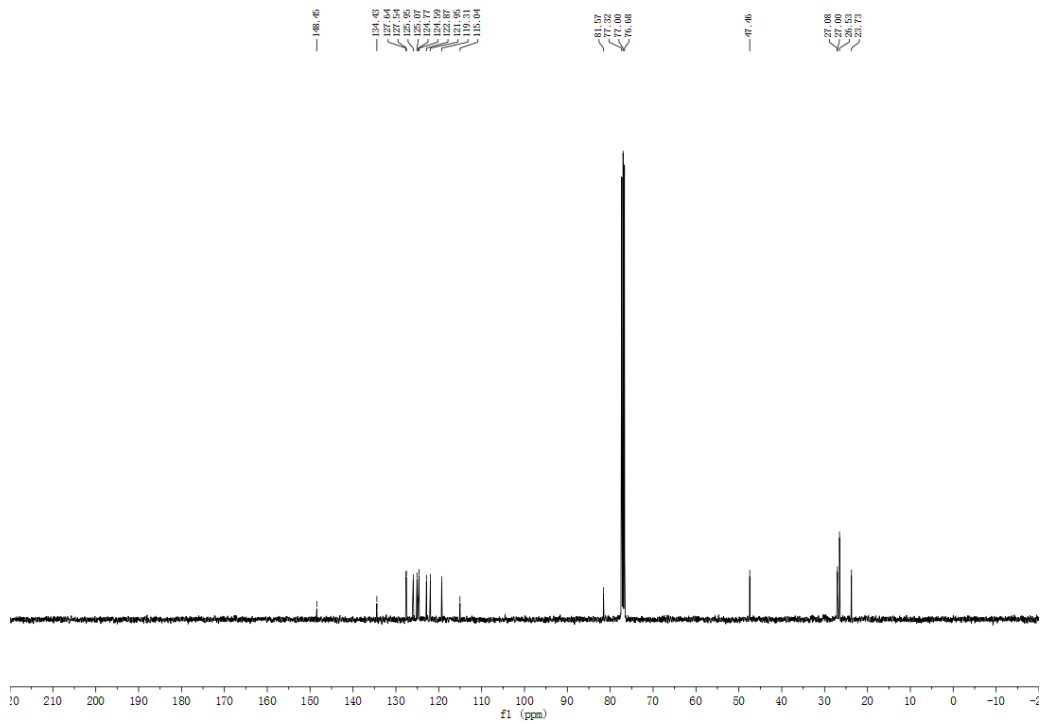

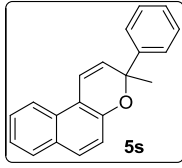

regioselectivity = 2:3

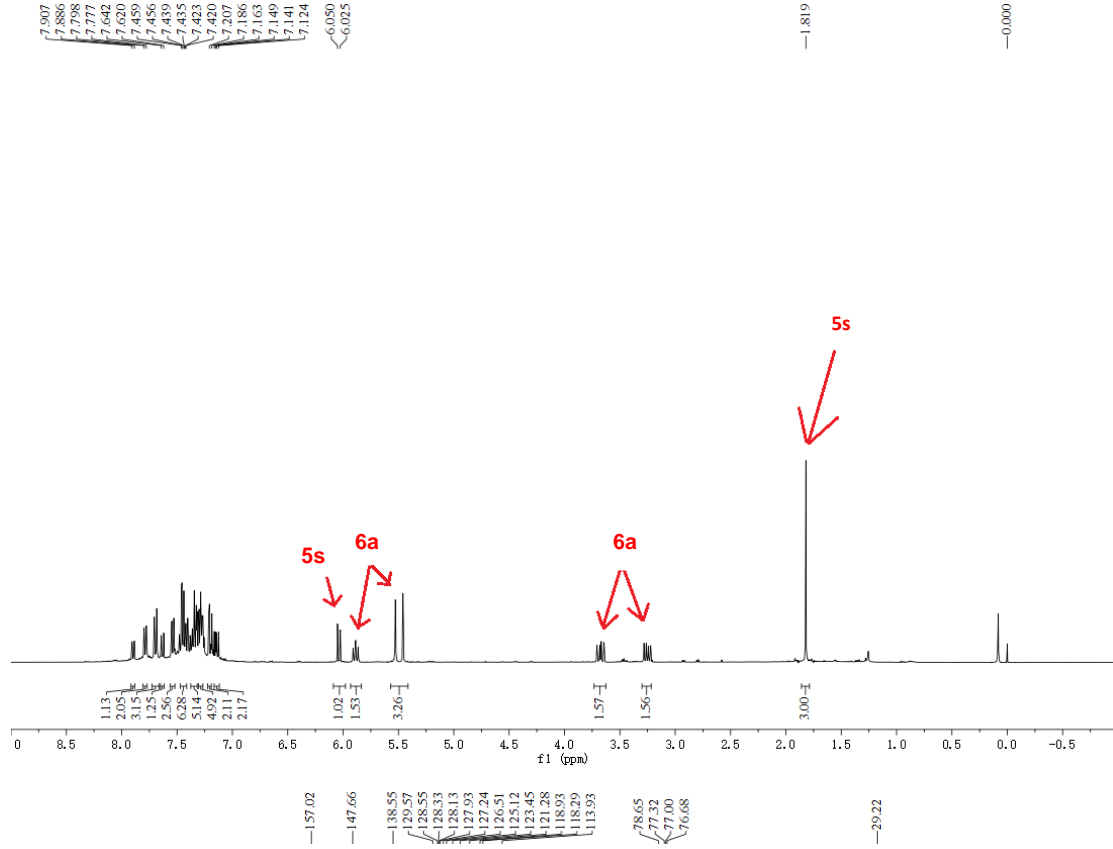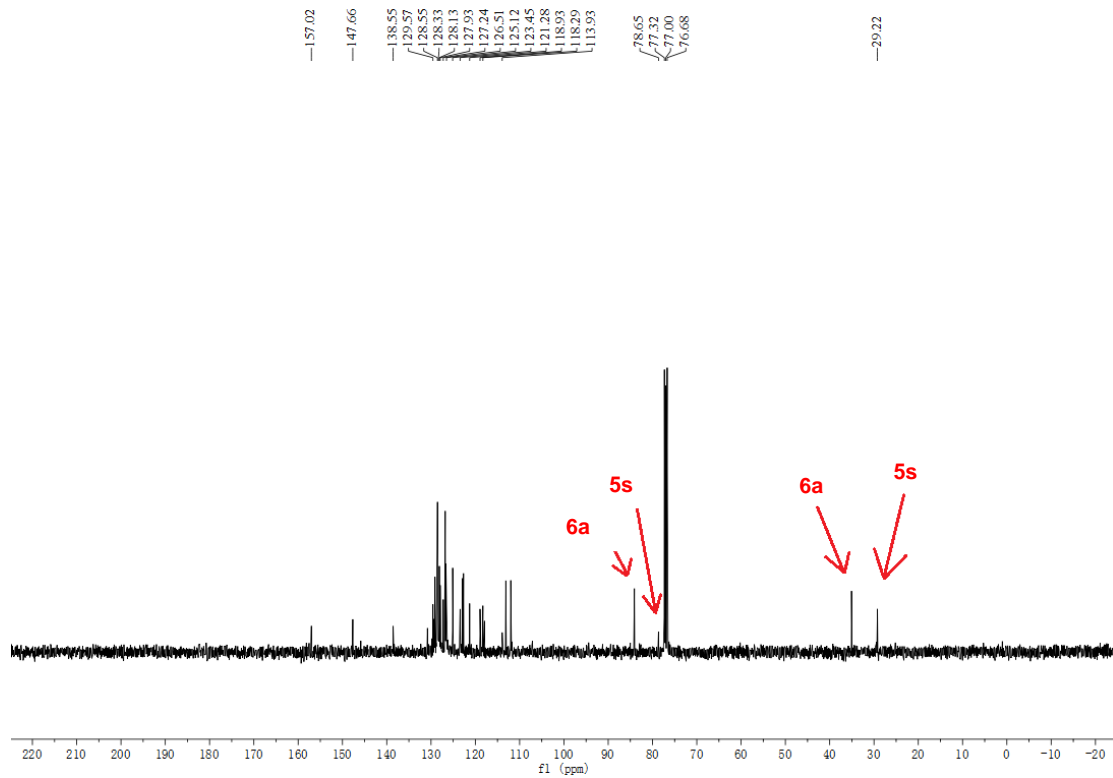



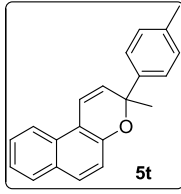

regioselectivity 10:1

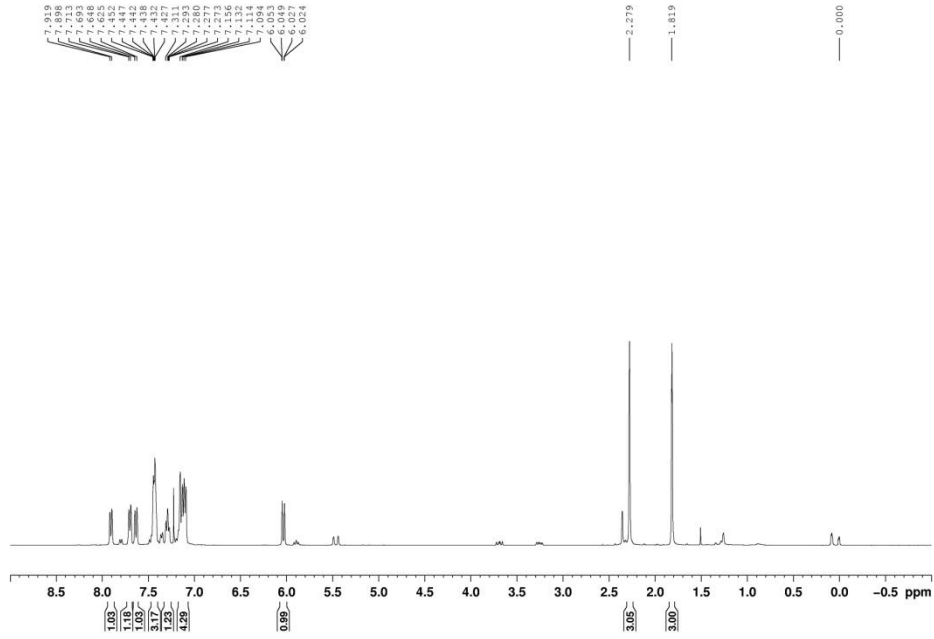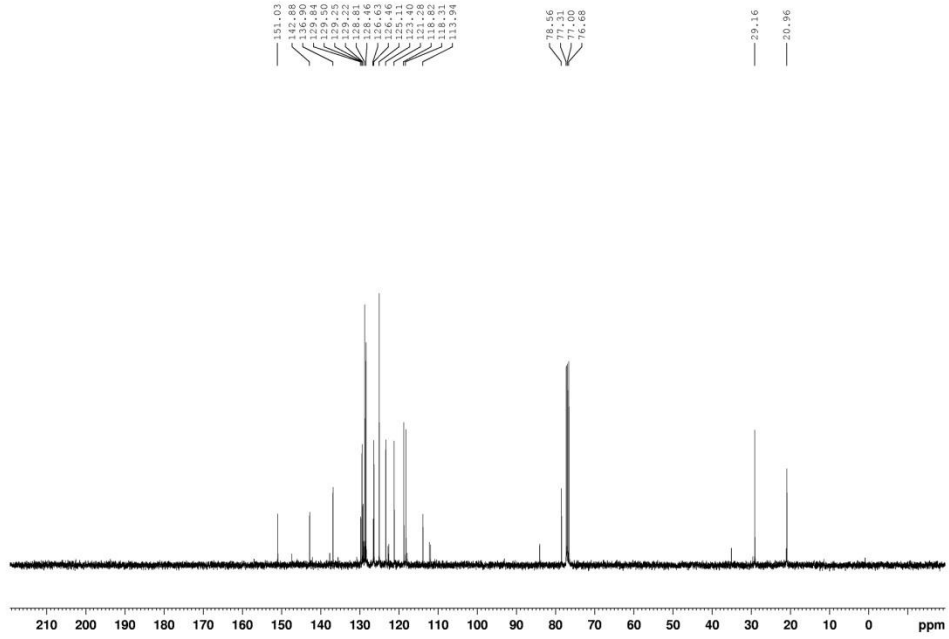

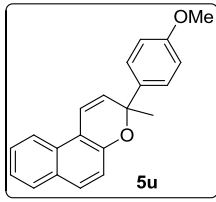

regioselectivity 14:1

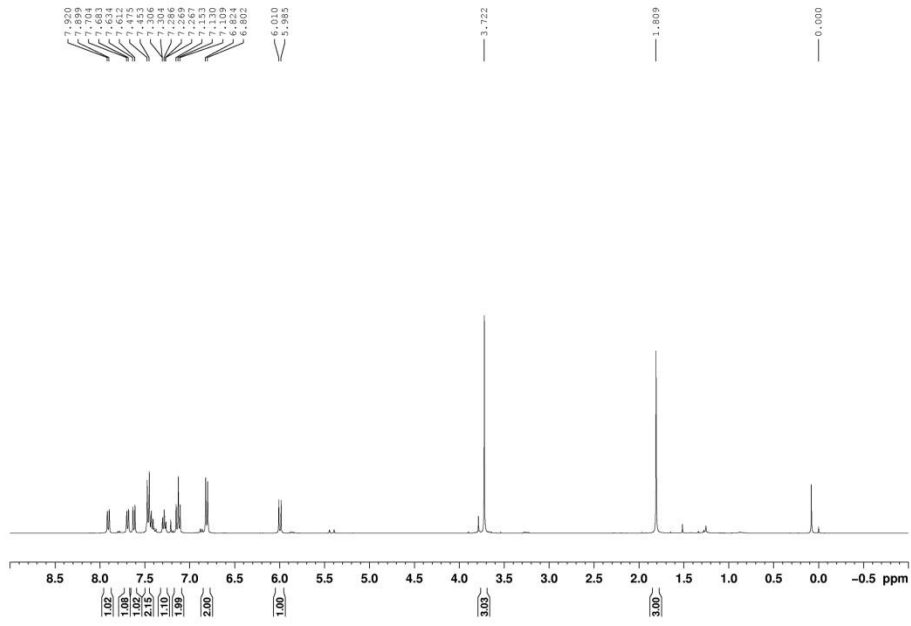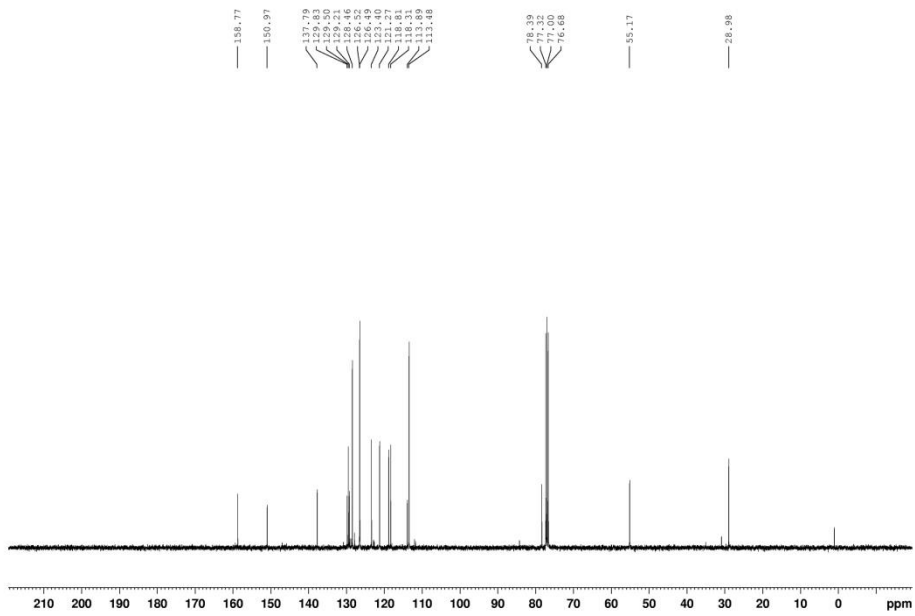

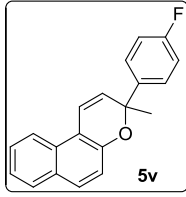

regioselectivity 5:1

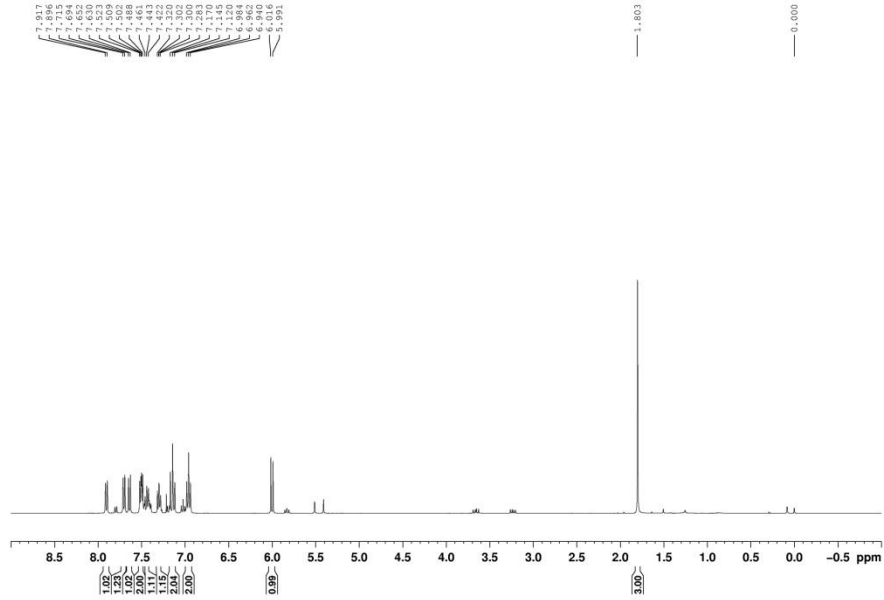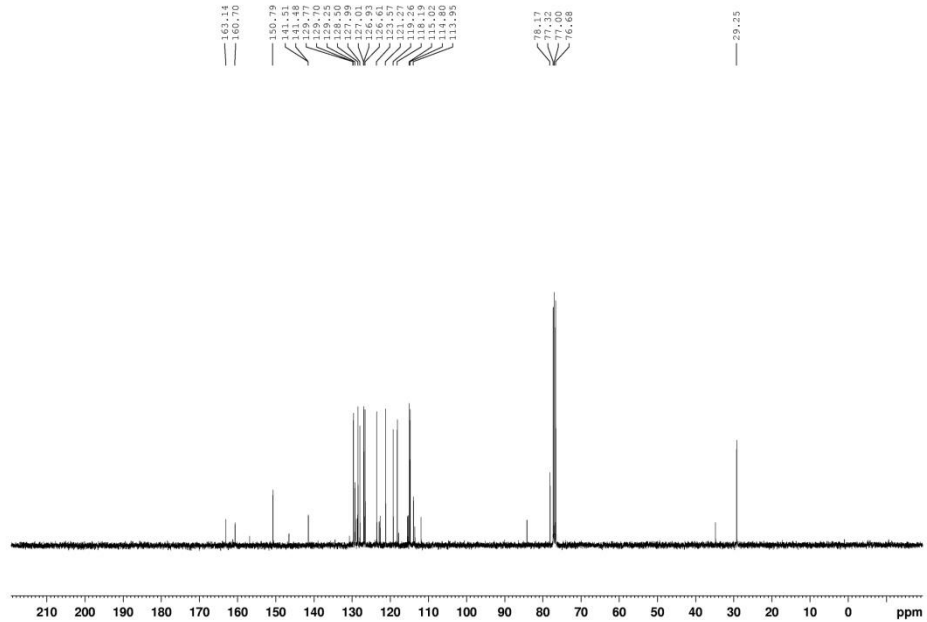



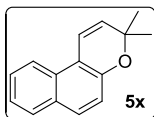

regioselectivity 3:1

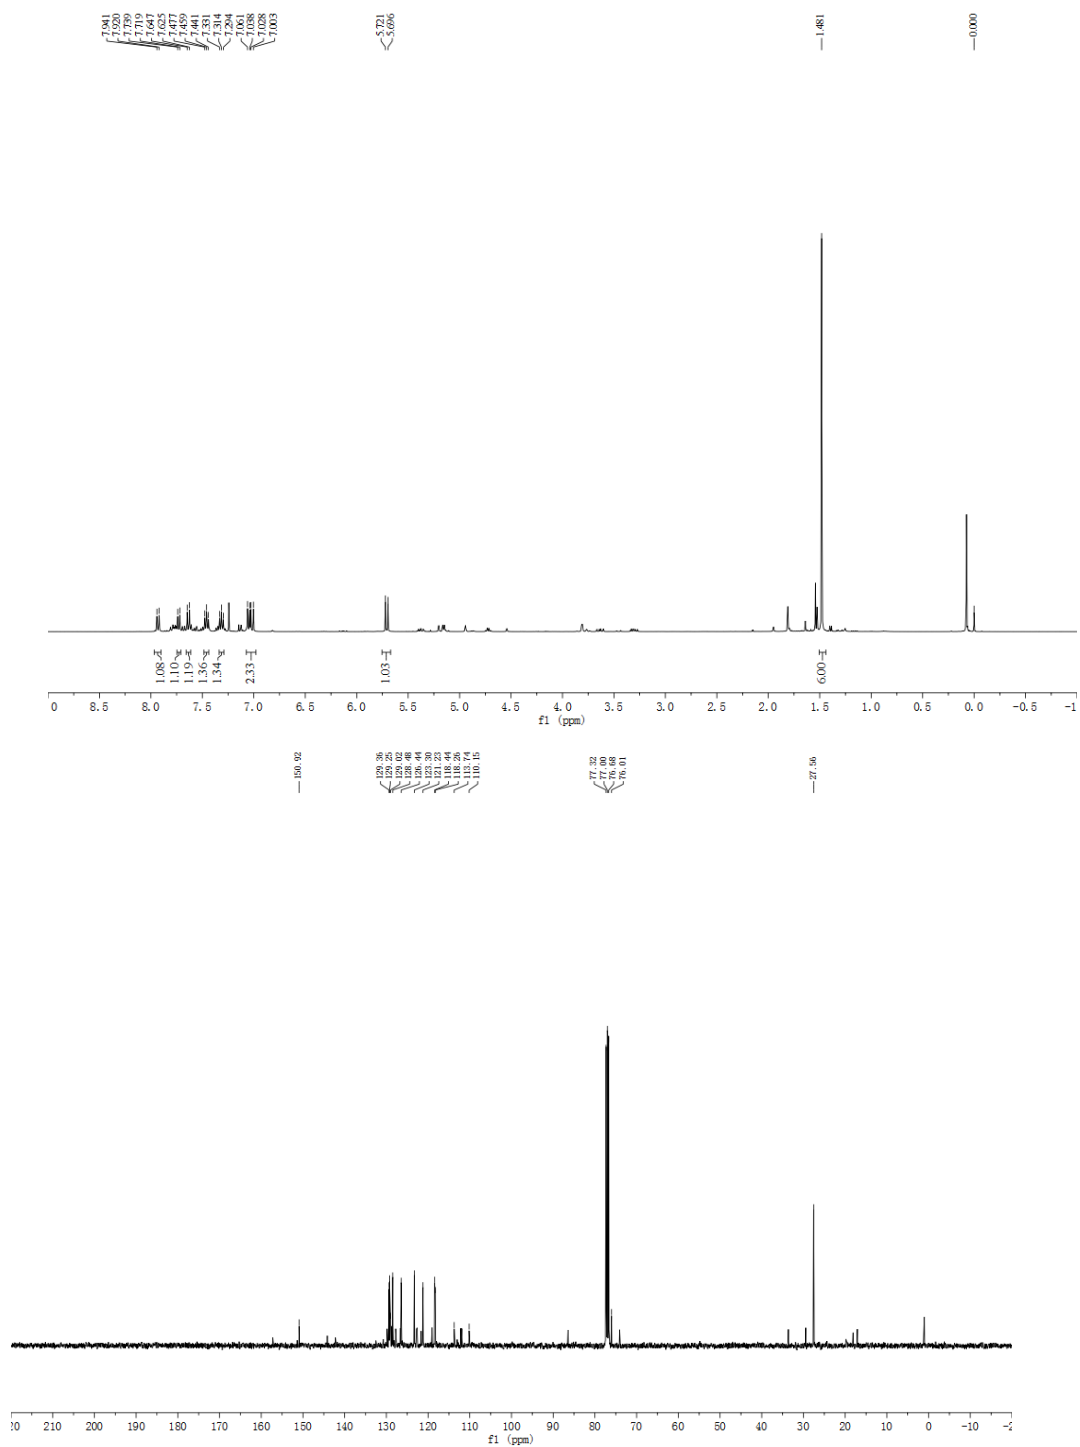

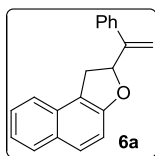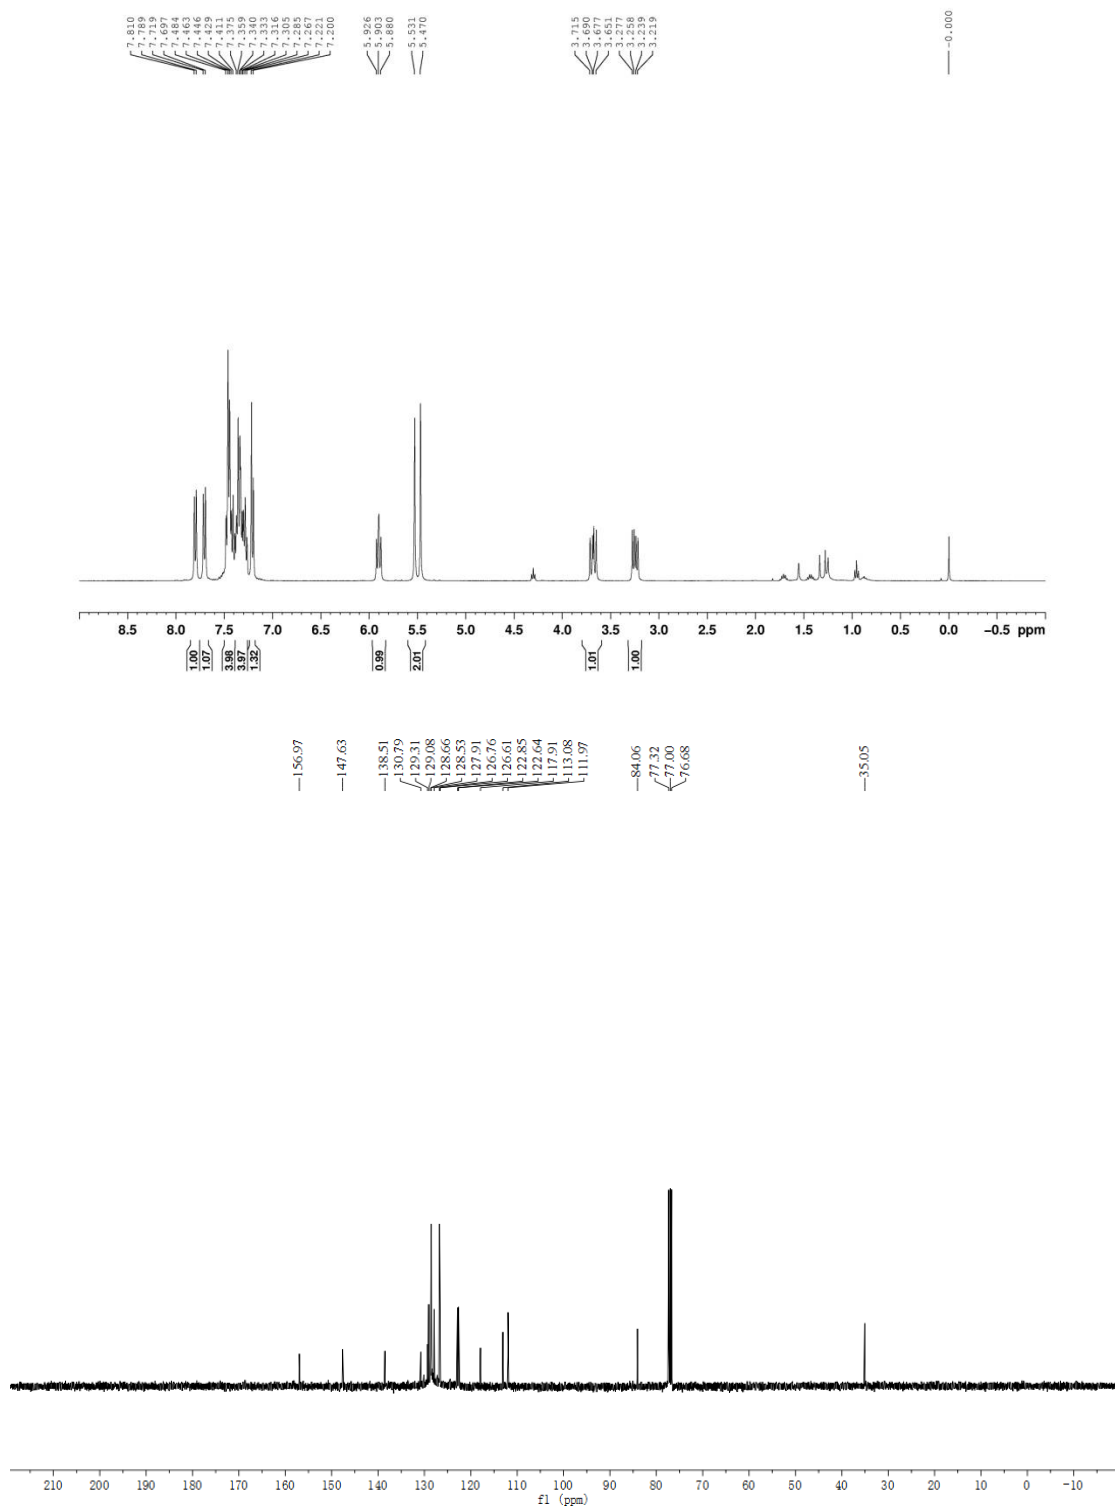

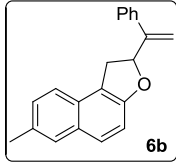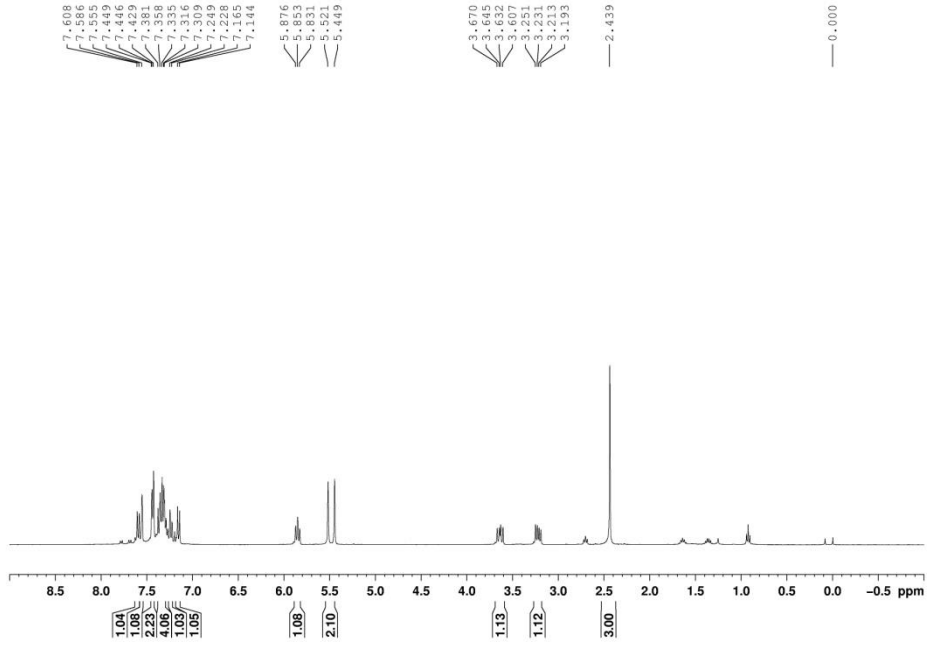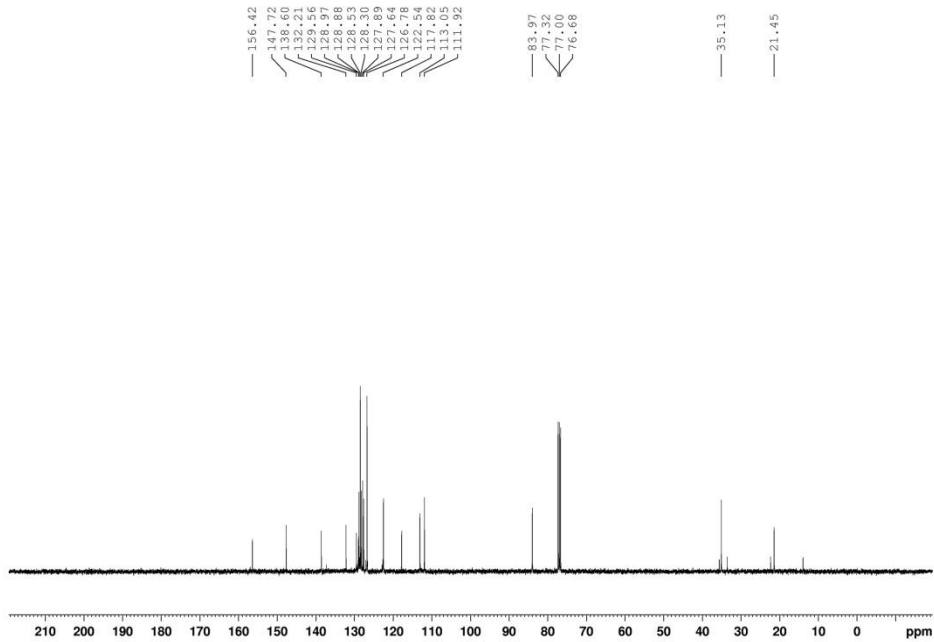

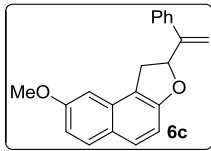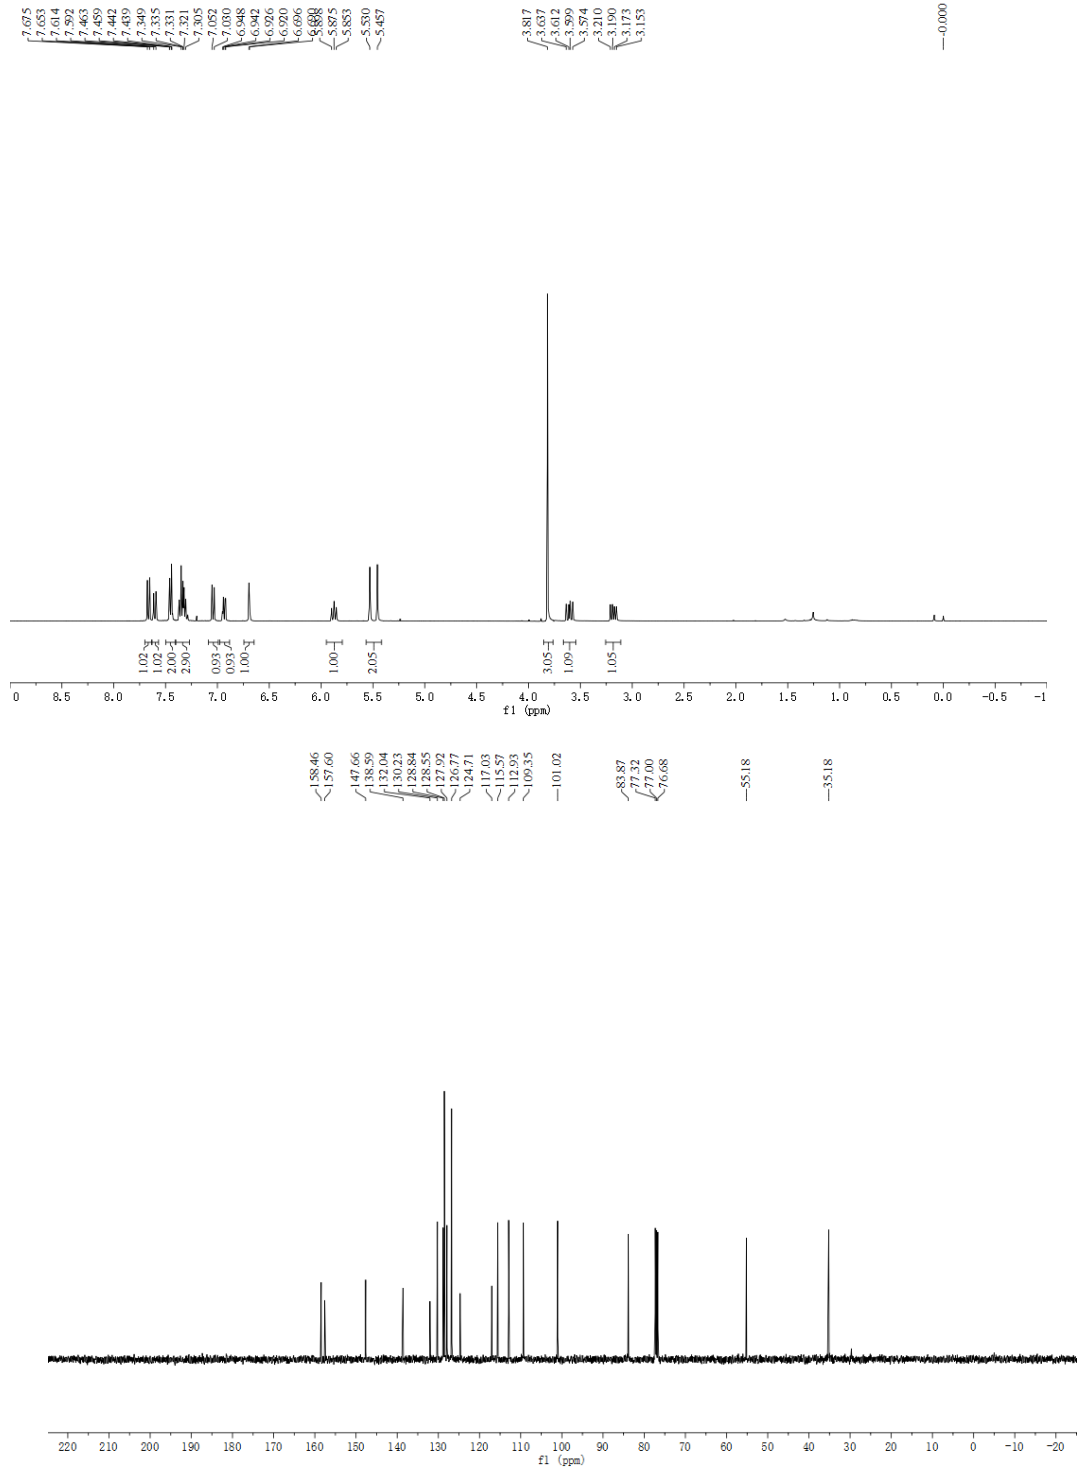



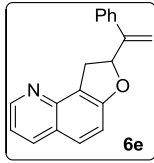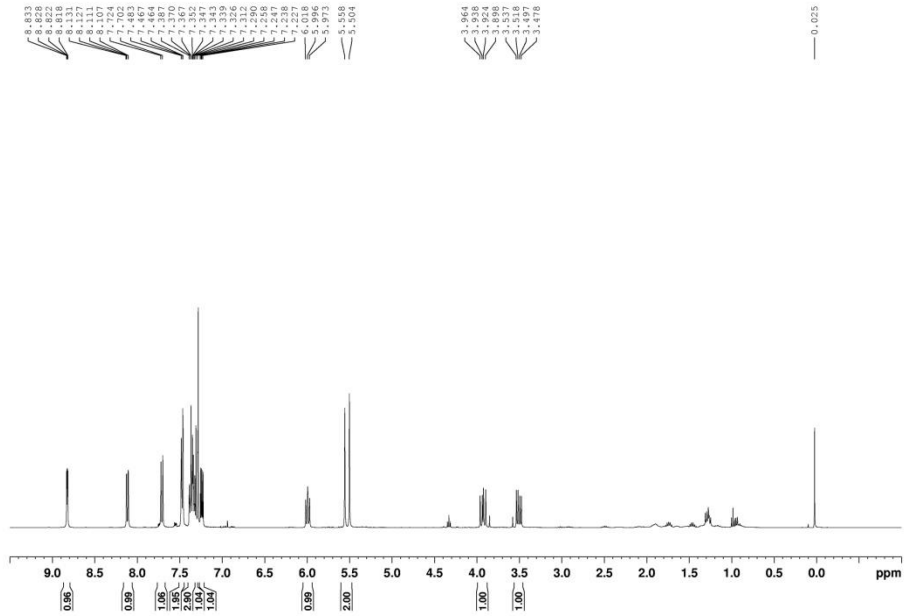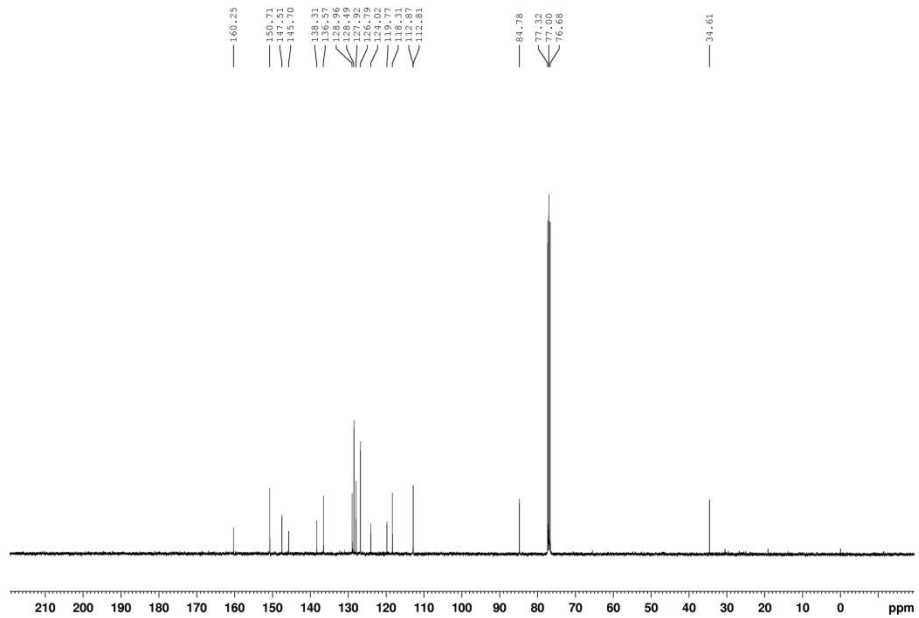

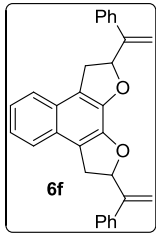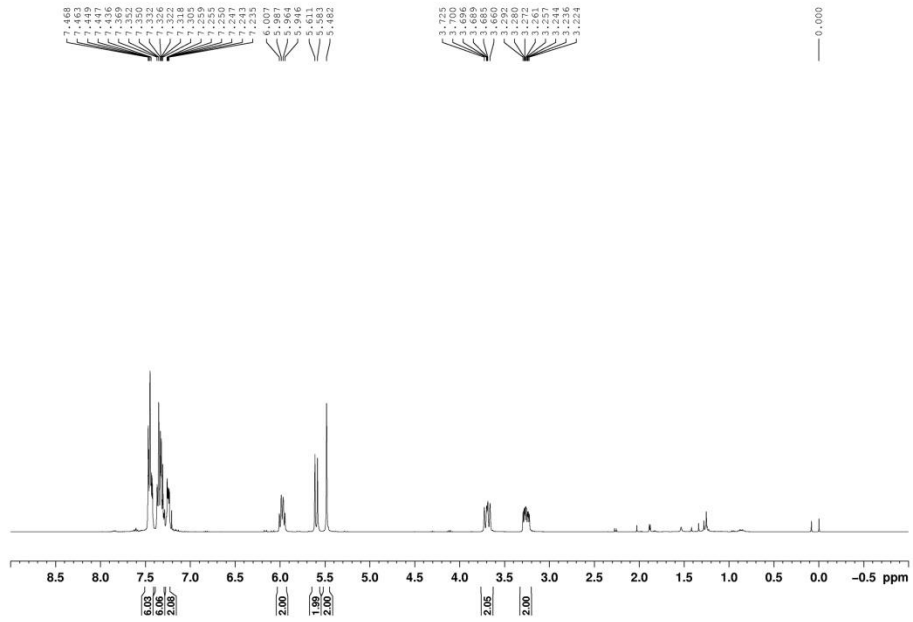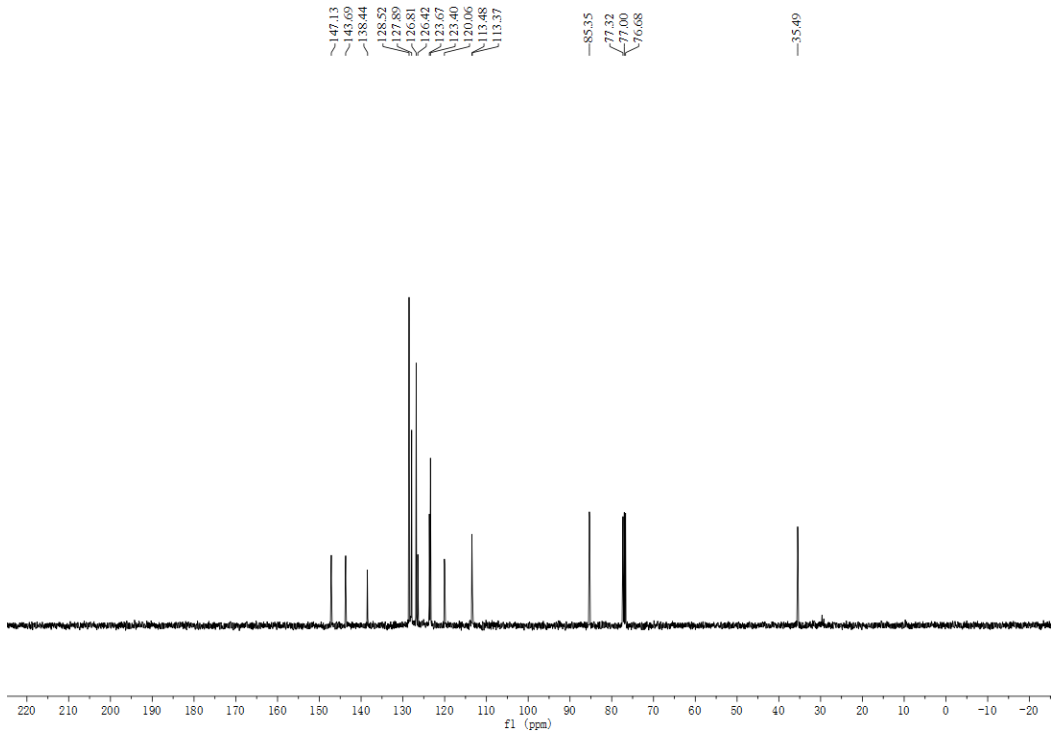

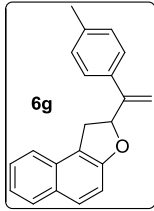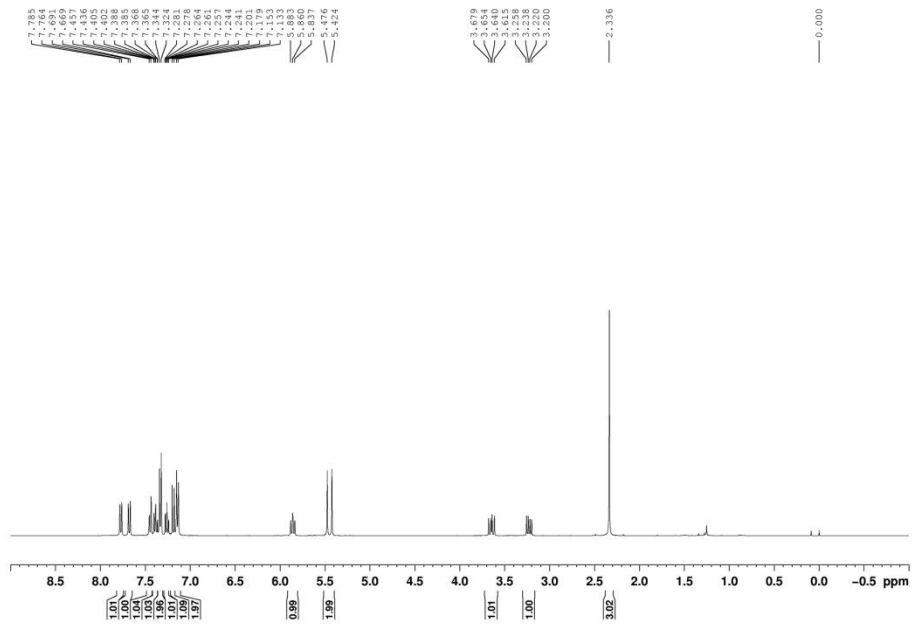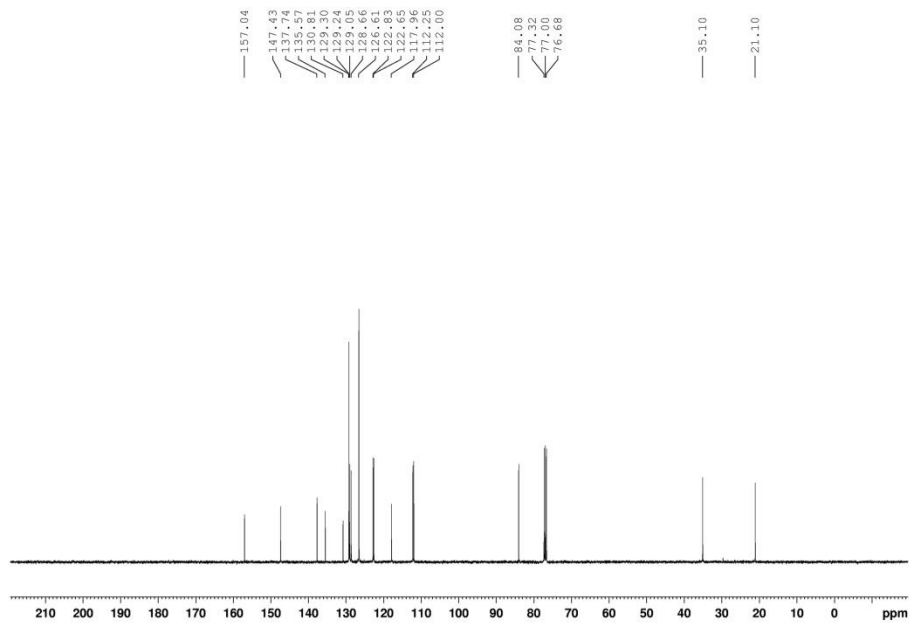

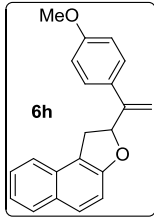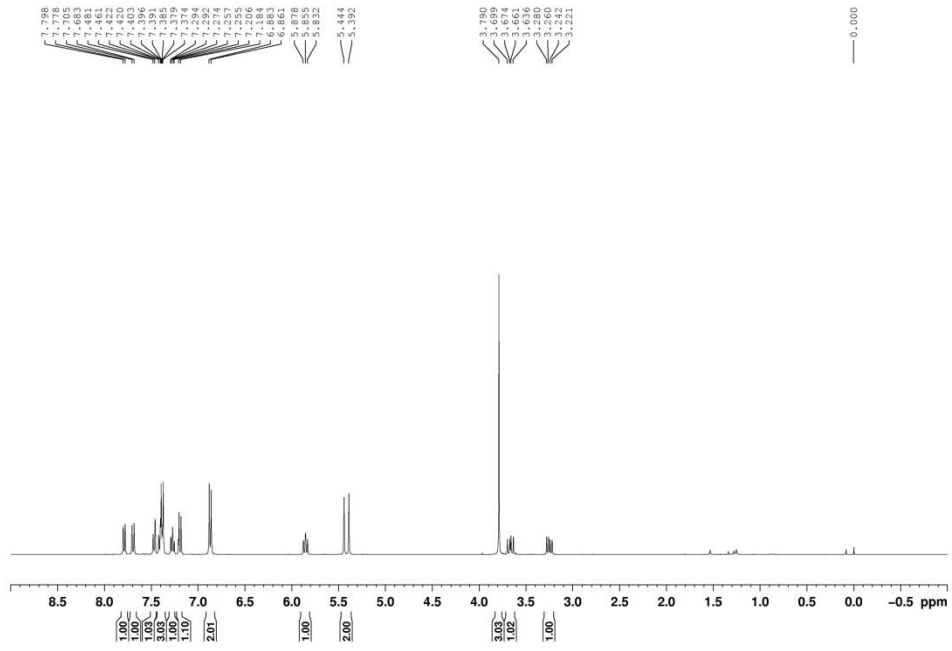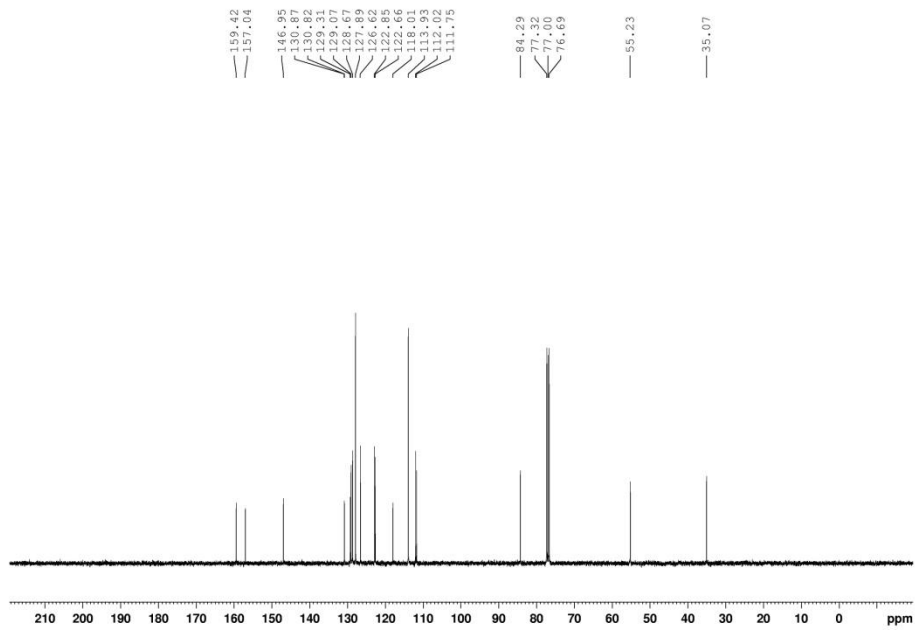

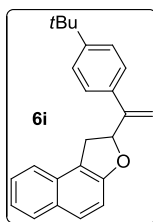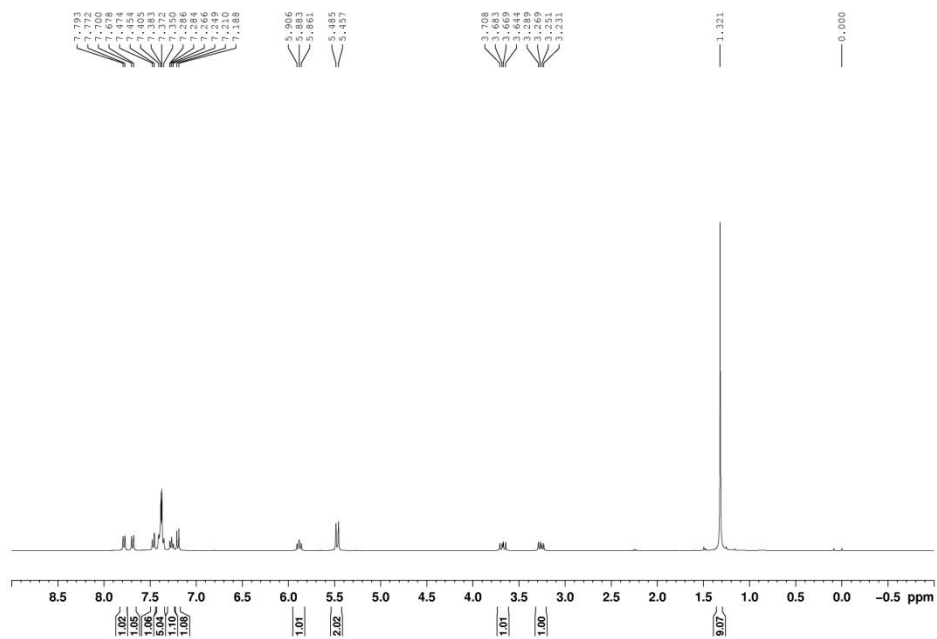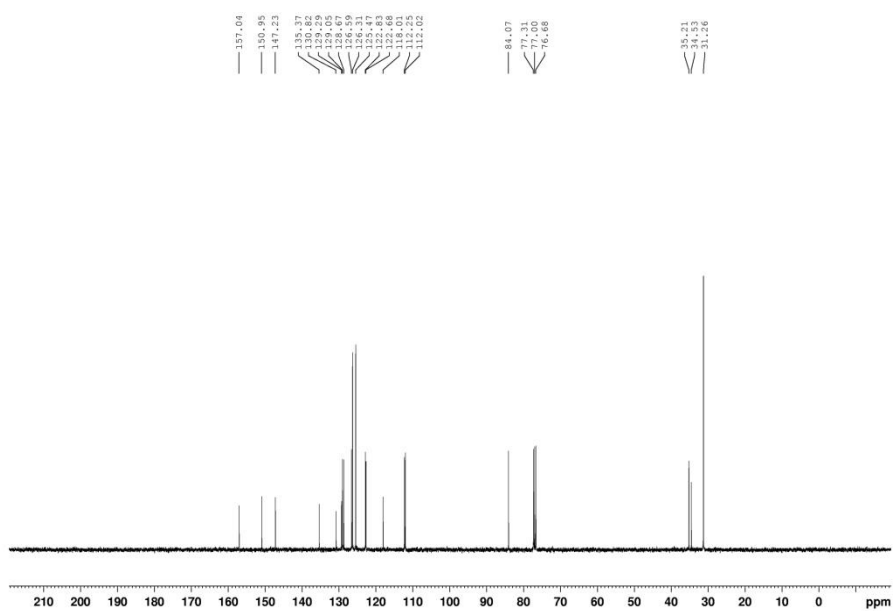

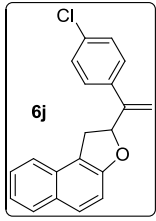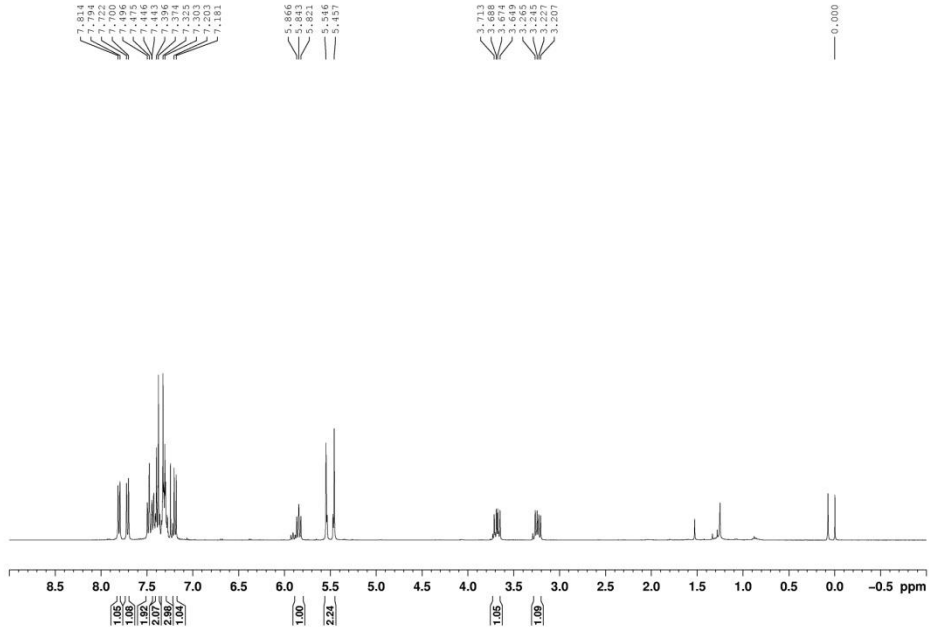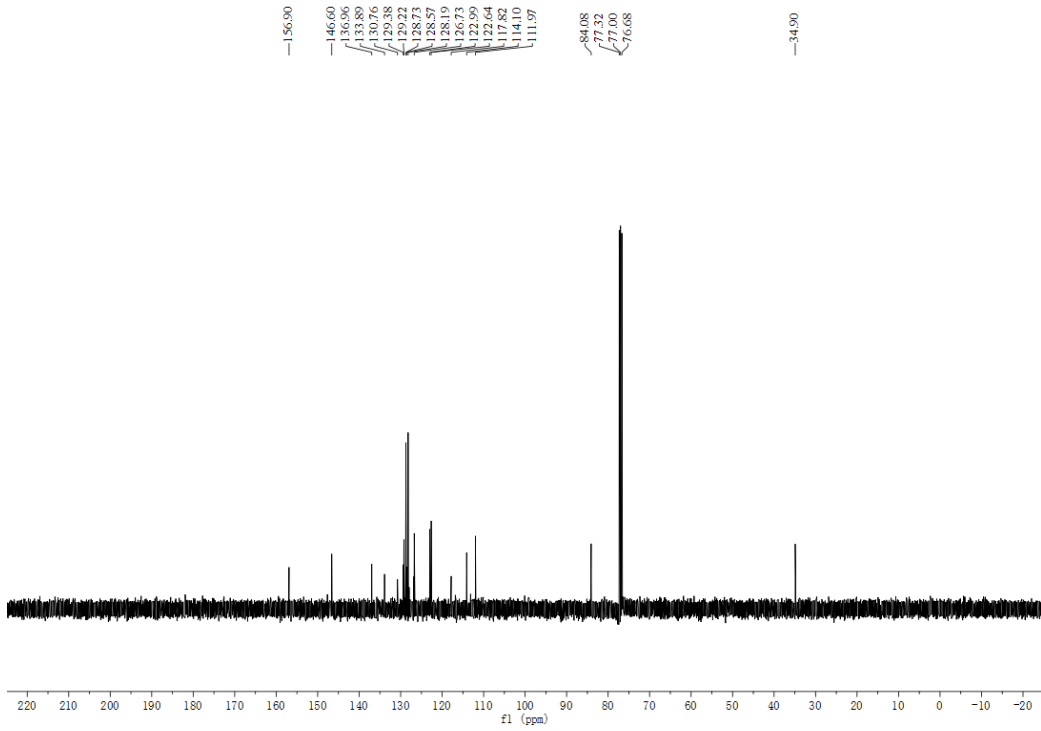

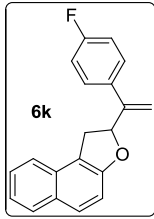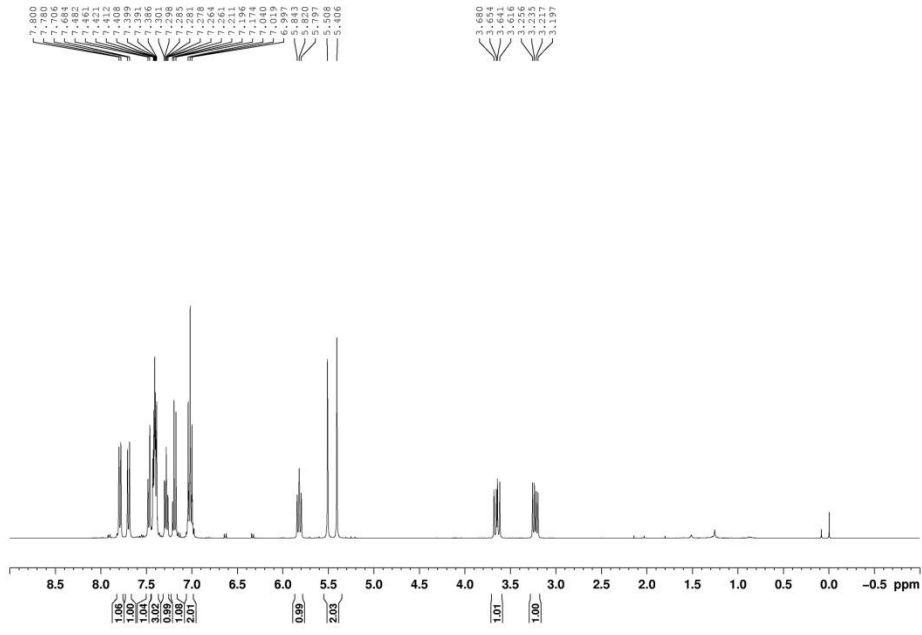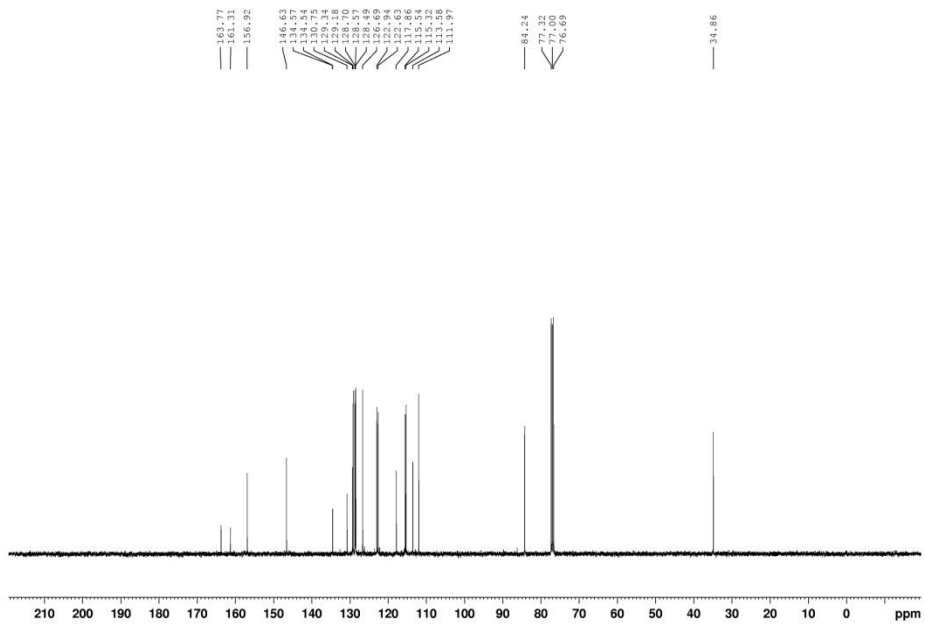

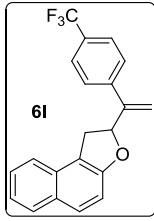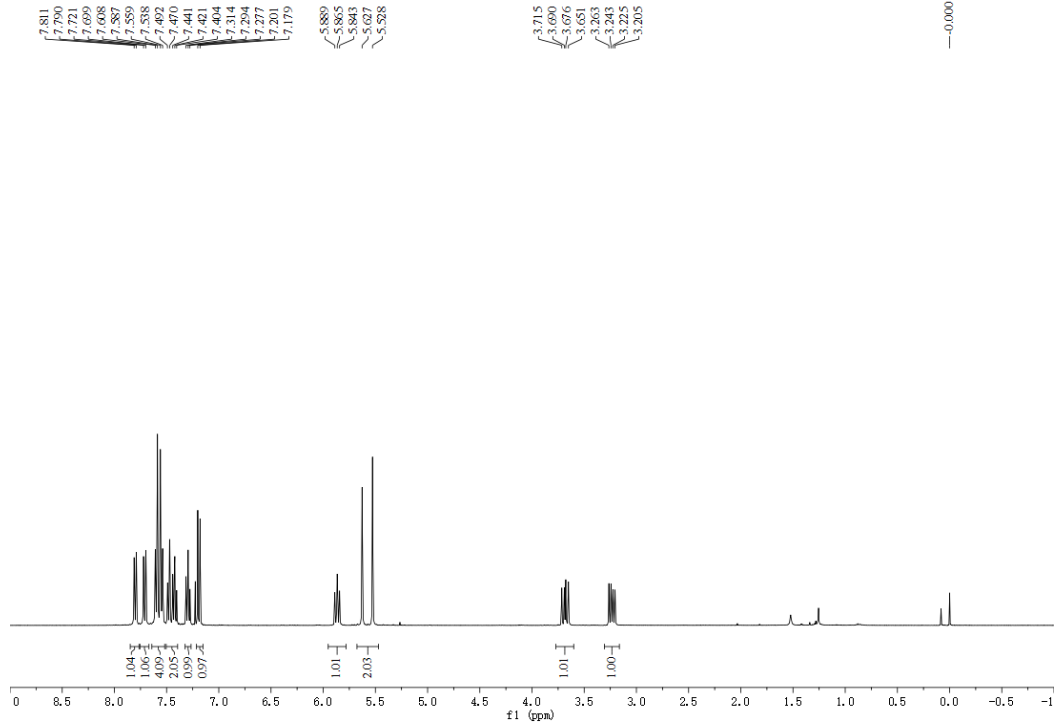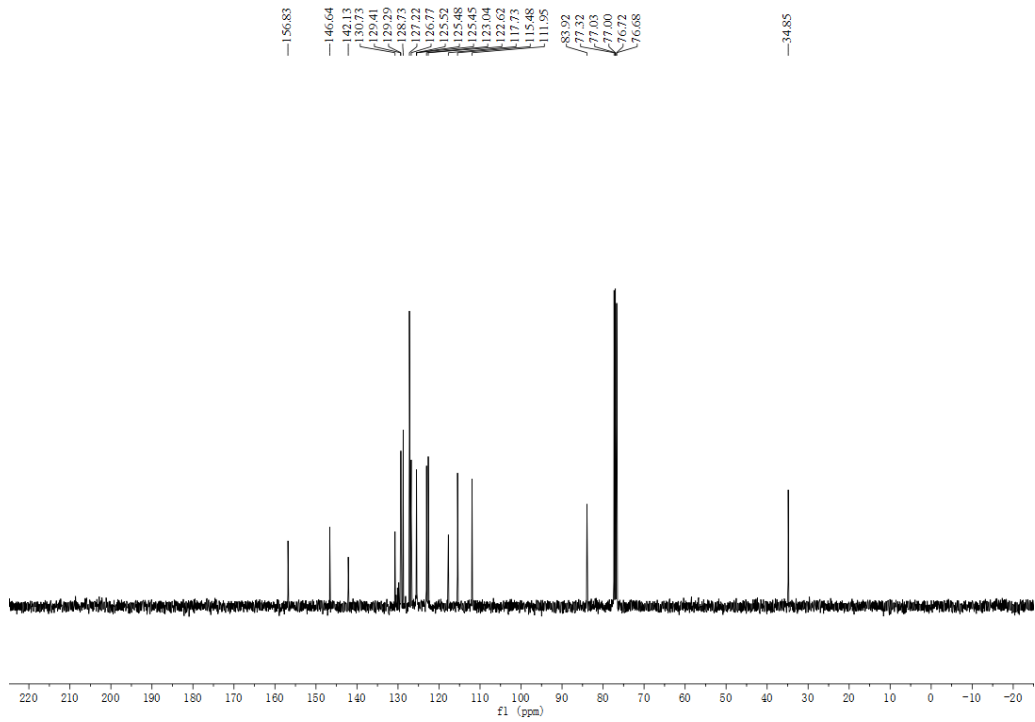



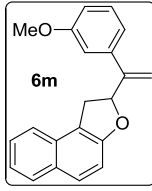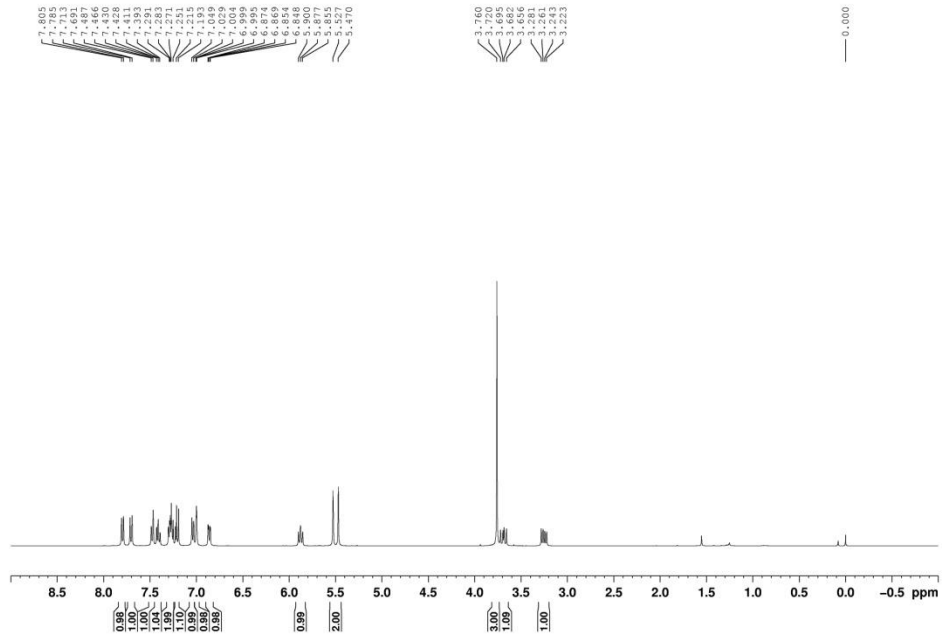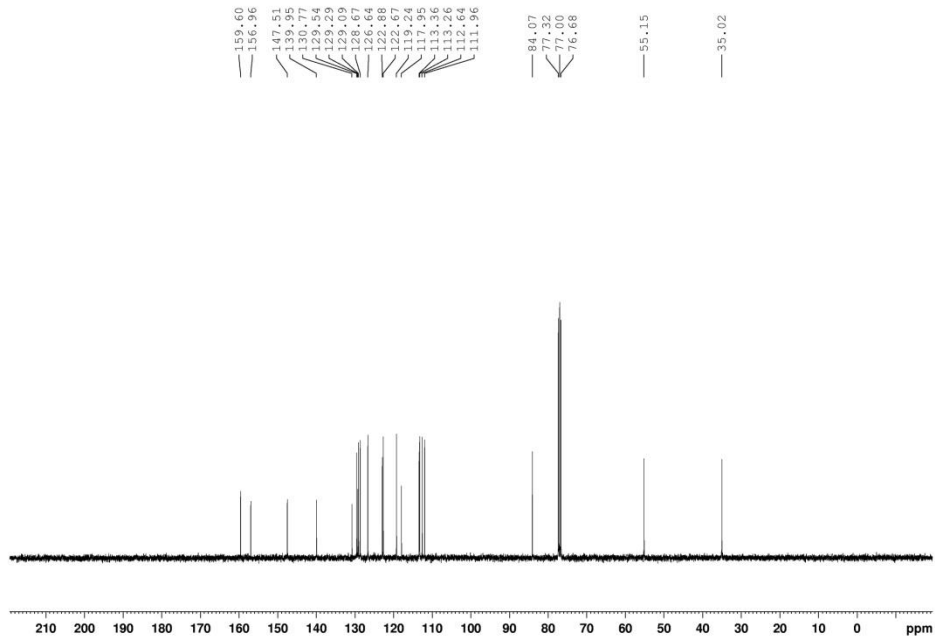

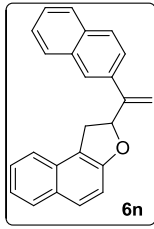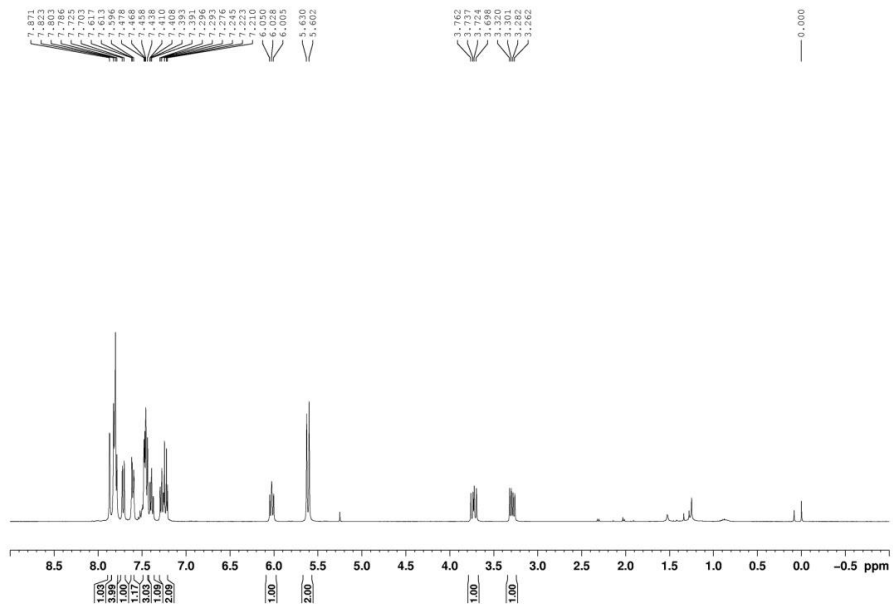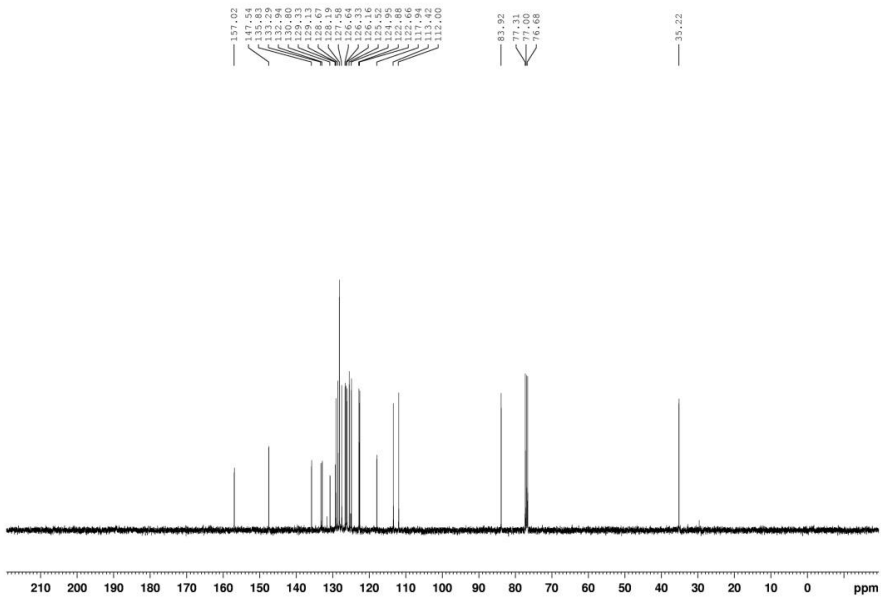

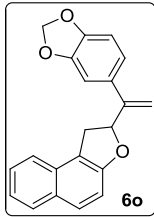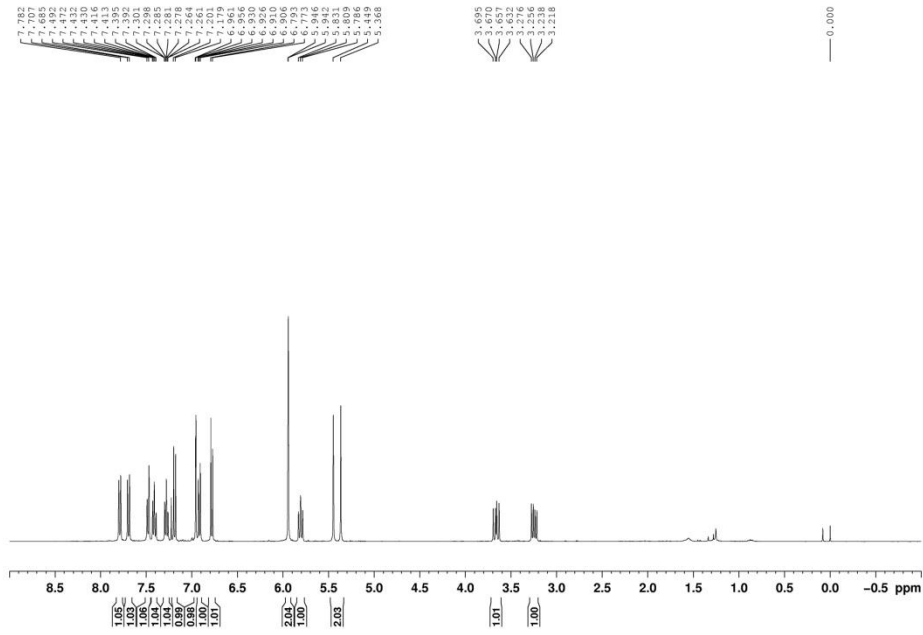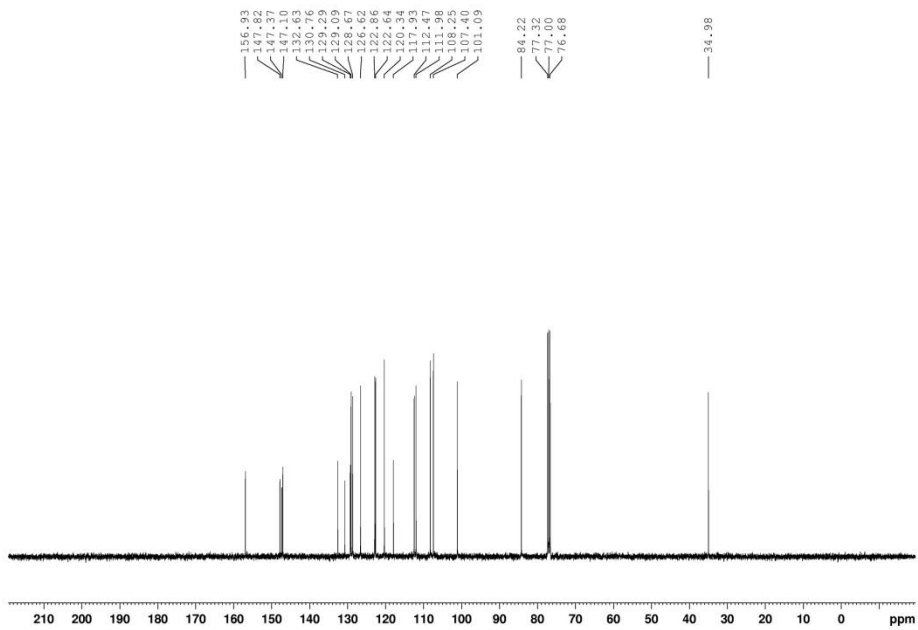

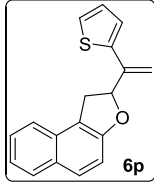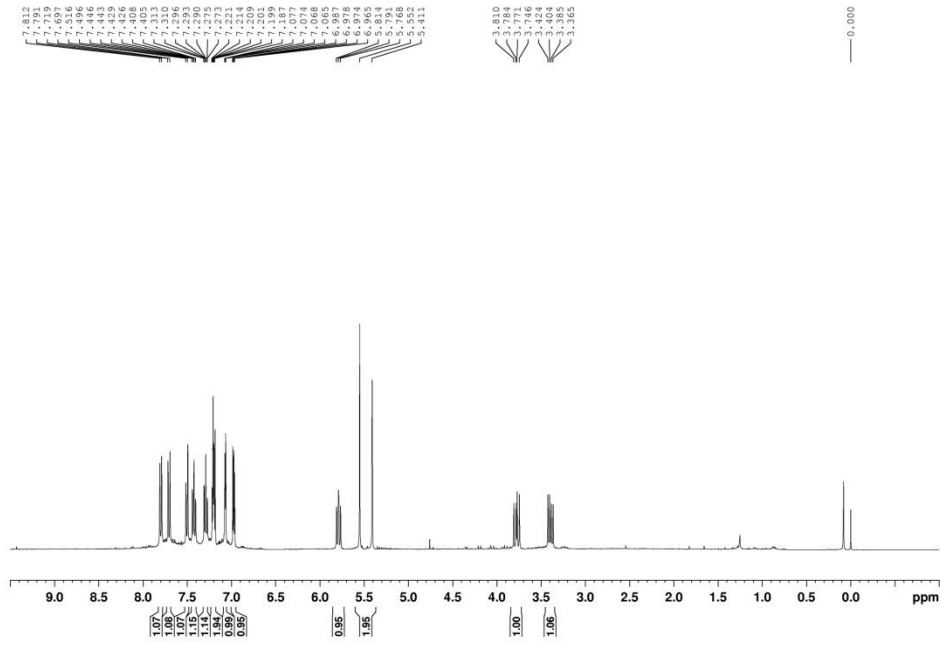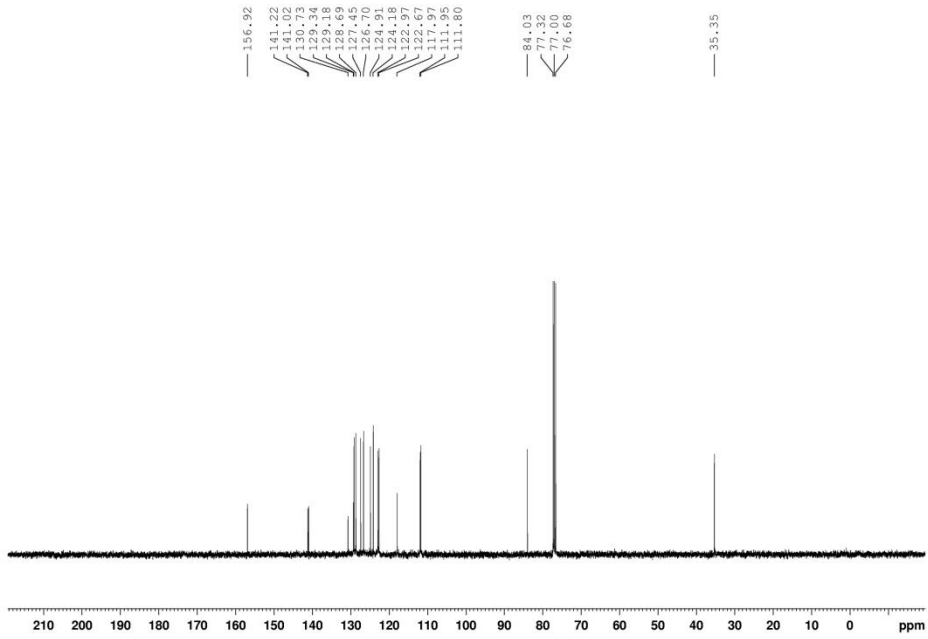

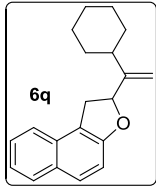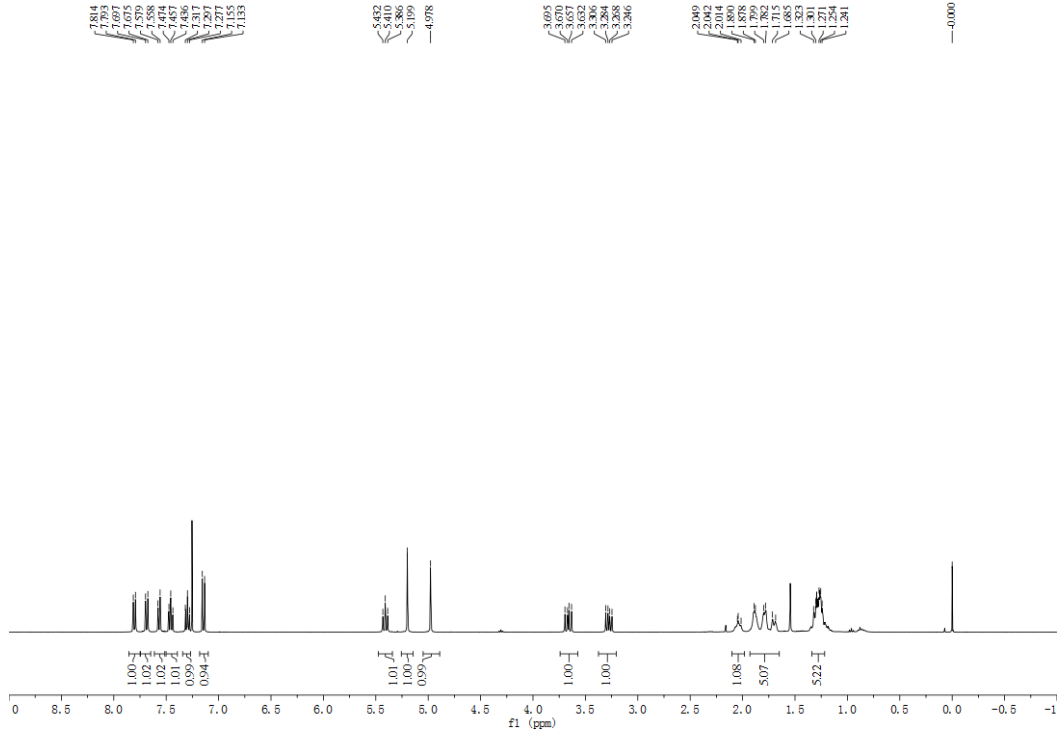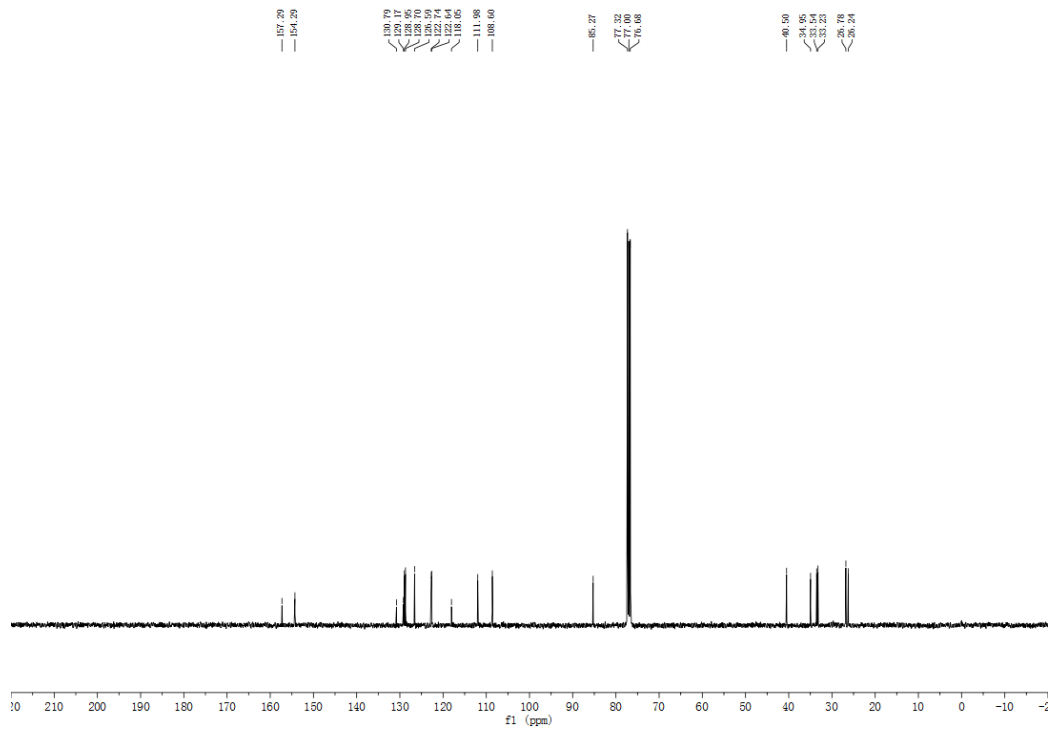

Supplement: c9cc00611g1.pdf [file c9cc00611g1.pdf]
